# Supplementary material
Source: publisher figshare collection journal article supplement (https://gsajournals.figshare.com/articles/dataset/_/22194526)
Supplement: Supplementary file 1 [file 1]

## Sheet: Sheet1
ID	Fem_CA	Fem_Imax	Fem_Imin	Fem_J	Tib_CA	Tib_Imax	Tib_Imin	Tib_J	Hum_CA	Hum_Imax	Hum_Imin	Hum_J	Rad_CA	Rad_Imax	Rad_Imin	Rad_J	Ulna_CA	Ulna_Imax	Ulna_Imin	Ulna_J	Scap_CA	Scap_Imax	Scap_Imin	Scap_J	Mand_CA	Mand_Imax	Mand_Imin	Mand_J	DOB	wean	Sex	Cross	Line	Direction	Generation	Mom	Dad	wk1	wk2	wk3	wk4	wk5	wk6	wk7	wk8	wk9	wk10	wk11	wk12
1419	0.7265	0.1312	0.0801	0.2113	0.5743	0.04563	0.03996	0.08559	0.5612	0.05318	0.03979	0.09297	0.2993	0.009735	0.009492	0.01923	0.2709	0.01366	0.003121	0.01678	0.5303	0.09733	0.02187	0.1192	1.745	1.0066	0.2712	1.2778	7/28/2012	8/21/2012	F	Y	2	GW	2	1082	1080	4.9	8.4	10.5	11.9	13.8	15.7	16.7	18.2	17.5	18.1	18.4	18.7
1422	0.8755	0.1862	0.1223	0.3085	0.6798	0.07596	0.05156	0.1275	0.584	0.05567	0.04013	0.0958	0.2896	0.009427	0.006822	0.01625	0.307	0.01748	0.003923	0.02141	0.5583	0.08492	0.03039	0.1153	1.8154	1.2148	0.2235	1.4383	7/28/2012	8/21/2012	M	Y	2	GW	2	1082	1080	4.6	8.3	10.9	14	16.3	17.2	18	21.3	19.8	20.6	21.7	20.4
1433	0.7358	0.1443	0.09449	0.2388	0.6342	0.06805	0.04743	0.1155	0.5395	0.05317	0.03772	0.09089	0.2546	0.008895	0.005613	0.01451	0.274	0.01531	0.004455	0.01976	0.5197	0.08423	0.0309	0.1151	1.6383	0.8891	0.2432	1.1322	7/30/2012	8/28/2012	M	Y	6	WG	2	736	624	8	9.7	11	13.7	17.3	17.5	17.7	18.4	19.1	19.4	19.3	19.6
1464	0.7807	0.1681	0.1133	0.2814	0.6548	0.06517	0.05906	0.1242	0.5735	0.06288	0.04691	0.1098	0.2786	0.008683	0.007383	0.01607	0.2624	0.0142	0.003174	0.01737	0.6097	0.08403	0.02915	0.1132	1.9087	1.1441	0.2887	1.4328	8/10/2012	9/7/2012	F	Y	2	WG	2	1095	1097	6.2	10.1	13.7	15.8	18.2	18.1	18.4	20	20.5	21.6	20.7	20.2
1471	0.7638	0.154	0.1	0.254	0.6549	0.0732	0.05507	0.1283	0.5575	0.05723	0.0416	0.09884	0.2829	0.01053	0.006024	0.01655	0.2778	0.01406	0.00366	0.01772	0.5162	0.08013	0.03033	0.1105	1.5553	0.92	0.2613	1.1813	8/14/2012	9/5/2012	M	Y	2	WG	2	1062	1059	5.2	9.2	12.2	16.1	21.3	20.8	22	22.4	23.6	23.9	23.6	24.1
1479	0.6137	0.09158	0.0587	0.1503	0.4932	0.03432	0.02903	0.06335	0.4393	0.03158	0.02512	0.0567	0.2153	0.005372	0.004653	0.01003	0.2343	0.01255	0.002578	0.01513	0.4901	0.07519	0.02784	0.103	1.5629	0.7952	0.2244	1.0197	8/15/2012	9/12/2012	M	Y	2	WG	2	1098	1099	4.3	7.6	9.1	10.9	13.3	14.1	15.8	15.3	16.2	17.4	17.3	16.9
1495	0.6874	0.1297	0.08411	0.2138	0.5551	0.04946	0.03505	0.08451	0.5734	0.05756	0.04157	0.09914	0.2774	0.007974	0.00629	0.01426	0.2652	0.01379	0.002821	0.01661	0.5874	0.09451	0.0268	0.1213	1.7401	0.9783	0.3004	1.2786	8/16/2012	9/10/2012	F	Y	2	GW	2	1009	1012	5.7	10.7	13.2	15.7	17.7	19	20.2	19.6	20.8	20.9	20.3	20.4
1503	0.7254	0.1489	0.08164	0.2305	0.5926	0.05216	0.04376	0.09592	0.5386	0.04942	0.03478	0.08421	0.2253	0.00646	0.005581	0.01204	0.2442	0.01289	0.002944	0.01583	0.4894	0.07128	0.02388	0.09517	1.7773	1.1035	0.288	1.3915	8/16/2012	9/9/2012	M	Y	2	WG	2	1016	1013	4.9	9	11.4	14.5	19.5	19.9	20	20.3	21.6	21.7	22.4	22.8
1414	0.6763	0.1191	0.07949	0.1986	0.4984	0.0416	0.03413	0.07573	0.4786	0.04338	0.02681	0.07019	0.2373	0.00639	0.005385	0.01177	0.2226	0.009949	0.002561	0.01251	0.4963	0.06574	0.01871	0.08445	1.7224	0.907	0.292	1.199	7/28/2012	8/16/2012	F	Y	2	WG	2	1016	1013	6.5	10.9	11.9	12.8	15.8	16.1	16.3	16.9	16.9	17.6	17	17.2
1423	0.6253	0.1054	0.06741	0.1728	0.5265	0.04468	0.0351	0.07978	0.4679	0.03758	0.02738	0.06497	0.2441	0.007547	0.005703	0.01325	0.2542	0.01206	0.003017	0.01508	0.4839	0.0623	0.02618	0.08848	1.607	0.9257	0.2513	1.177	7/28/2012	8/21/2012	F	Y	2	GW	2	1082	1080	4.7	8	10.9	13.4	15.4	16.6	17.9	19.2	18.1	19.4	18.9	18.4
1442	0.7087	0.1276	0.0763	0.2039	0.5782	0.04843	0.04264	0.09107	0.5386	0.04881	0.04112	0.08993	0.2225	0.005503	0.004729	0.01023	0.2866	0.01587	0.003297	0.01917	0.2922	0.02889	0.009194	0.03808	1.1757	0.5275	0.1228	0.6503	8/7/2012	8/29/2012	F	Y	2	WG	2	1018	1015	5.5	9.2	11.8	13.5	15.4	17.1	17.4	18	18.7	19.5	19.9	19.3
1450	0.7645	0.1592	0.1016	0.2608	0.6439	0.06848	0.05628	0.1248	0.5605	0.05835	0.03735	0.0957	0.2568	0.007224	0.006228	0.01345	0.2808	0.01673	0.003005	0.01973	0.4787	0.08358	0.02352	0.1071	1.5776	0.9301	0.2225	1.1526	8/8/2012	8/31/2012	M	Y	2	GW	2	1135	1133	5.4	9.9	11.9	15.9	18.3	18.6	19.1	20.1	20.1	20.8	20.5	19.9
1458	0.8631	0.1878	0.1134	0.3012	0.7248	0.08528	0.06597	0.1512	0.6466	0.07032	0.05168	0.122	0.2896	0.01057	0.007828	0.0184	0.2994	0.01807	0.003602	0.02167	0.5675	0.1124	0.02879	0.1412	1.7123	0.935	0.2647	1.1997	8/8/2012	8/31/2012	M	Y	2	GW	2	1132	1131	5.4	9.2	11.7	14.7	17.6	19.1	19.9	20.3	21.2	23.1	22.5	24
1465	0.6094	0.0911	0.05855	0.1496	0.5242	0.04415	0.03159	0.07574	0.4574	0.03384	0.02511	0.05895	0.2227	0.005598	0.004287	0.009885	0.248	0.01441	0.002191	0.0166	0.5127	0.07655	0.0206	0.09714	1.3899	0.7267	0.1961	0.9227	8/10/2012	9/7/2012	M	Y	2	WG	2	1095	1097	5	8.8	11.1	13.4	15.3	15.7	15.7	15.6	16.5	16.5	17.1	16.2
1472	0.6647	0.1067	0.07822	0.1849	0.5595	0.04774	0.0407	0.08844	0.5206	0.05102	0.03694	0.08796	0.2106	0.005467	0.004442	0.00991	0.2635	0.01292	0.003771	0.0167	0.5263	0.08062	0.02147	0.1021	1.6136	0.8974	0.2495	1.1469	8/14/2012	9/5/2012	M	Y	2	WG	2	1062	1059	4.9	8.6	11.1	13	15.4	16.6	17.5	17.5	18.1	18.1	17.7	18.2
1480	0.5769	0.07997	0.04833	0.1283	0.5086	0.03576	0.0287	0.06447	0.5115	0.04764	0.02729	0.07493	0.2222	0.005597	0.004787	0.01038	0.2602	0.01255	0.003559	0.0161	0.499	0.05942	0.02135	0.08077	1.5286	0.7864	0.2245	1.0109	8/15/2012	9/12/2012	F	Y	2	WG	2	1098	1099	4.2	7.5	9.5	11.1	12.9	14	14.5	14.1	14.8	15.5	15.2	14.9
1496	0.7455	0.1602	0.09981	0.26	0.6091	0.05224	0.04172	0.09396	0.5392	0.0507	0.03729	0.088	0.2588	0.007189	0.005974	0.01316	0.274	0.01241	0.004279	0.01669	0.537	0.1003	0.02729	0.1276	1.5763	0.9067	0.1982	1.1048	8/16/2012	9/10/2012	F	Y	2	GW	2	1009	1012	5.4	10.5	13.3	14.7	16.7	17.9	18.3	18.2	19.3	19.6	19.4	19.8
1416	0.7494	0.1408	0.09934	0.2401	0.6031	0.0522	0.04541	0.09761	0.5651	0.05471	0.04176	0.09647	0.2788	0.009495	0.006378	0.01587	0.2733	0.01397	0.003005	0.01697	0.4926	0.07041	0.02147	0.09188	1.5436	0.8346	0.2335	1.0682	7/28/2012	8/21/2012	F	Y	2	GW	2	1082	1080	4.3	7.6	10.1	11.6	13.7	15	16	17	16	16.9	17.4	17.7
1427					0.5563	0.05193	0.04157	0.09349	0.5143	0.04625	0.03134	0.07759	0.2467	0.008004	0.006501	0.01451	0.2442	0.01281	0.002374	0.01518	0.4257	0.06738	0.01883	0.08621	1.8185	0.9178	0.2867	1.2045	7/30/2012	8/28/2012	F	Y	6	WG	2	736	624	7.6	9.3	11.3	12.9	13.6	14.6	15.5	16.7	16.4	17.2	17	17.2
1435	0.7532	0.1462	0.08895	0.2352	0.6582	0.07219	0.0444	0.1166	0.6009	0.06309	0.04461	0.1077	0.2853	0.009705	0.006902	0.01661	0.2673	0.01344	0.003345	0.01678	0.5584	0.1037	0.0278	0.1315	2.0084	1.2088	0.3241	1.5329	7/30/2012	8/28/2012	F	Y	6	WG	2	736	624	9	10.8	14.1	15.9	17.6	18	20.4	21.8	20.7	22.8	20	21.2
1459	0.8123	0.1703	0.1031	0.2735	0.6707	0.07428	0.05546	0.1297	0.5944	0.06354	0.03919	0.1027	0.2823	0.00926	0.007199	0.01646	0.2666	0.01503	0.003078	0.01811	0.535	0.08043	0.02006	0.1005	1.6319	0.8442	0.2355	1.0797	8/8/2012	8/31/2012	M	Y	2	GW	2	1132	1131	4.7	8.1	10.8	13.7	16.6	18	18.9	19.5	20	21.3	21.2	21.7
1497	0.7017	0.1264	0.08933	0.2157	0.5995	0.05524	0.04359	0.09883	0.4907	0.04192	0.03213	0.07405	0.2624	0.007163	0.0054	0.01256	0.2443	0.01098	0.002787	0.01377	0.4813	0.08034	0.02257	0.1029	1.7741	0.8967	0.2993	1.1961	8/16/2012	9/10/2012	F	Y	2	GW	2	1009	1012	5.3	10.3	12.5	14.4	15.9	17.3	17.7	17	18.5	18.9	19.5	20.4
1505	0.7607	0.1641	0.1101	0.2742	0.6151	0.0728	0.04758	0.1204	0.5791	0.06823	0.03995	0.1082	0.2821	0.01083	0.007962	0.01879	0.3021	0.01759	0.005497	0.02309	0.6732	0.1178	0.05005	0.1679	1.8022	1.0517	0.27	1.3217	8/16/2012	9/9/2012	M	Y	2	WG	2	1016	1013	5.5	9.6	13.6	14.8	20.9	21.1	22.6	22.2	24	24.5	25.2	25.6
1417	0.6444	0.1187	0.06576	0.1845	0.5345	0.04924	0.03731	0.08656	0.5323	0.0491	0.03525	0.08436	0.2364	0.007741	0.004885	0.01263	0.2619	0.01497	0.003343	0.01832	0.4917	0.0725	0.02136	0.09386	1.5955	0.8216	0.2234	1.045	7/28/2012	8/21/2012	M	Y	2	GW	2	1082	1080	4.5	8	10.5	13.4	15.7	15.7	16.9	18.3	17.3	18	18.4	18.4
1436	0.6081	0.09895	0.05915	0.1581	0.4898	0.0366	0.03606	0.07265	0.4789	0.04418	0.03044	0.07462	0.2262	0.006926	0.005876	0.0128	0.2202	0.01118	0.002488	0.01367	0.3968	0.05227	0.01771	0.06998	1.3459	0.6552	0.1947	0.8499	8/6/2012	9/3/2012	F	Y	2	GW	2	1010	1012	5.5	9.5	11.7	12.6	14.1	13.9	14.7	14.4	14.7	15.5	15.7	16.8
1452	0.6162	0.123	0.06729	0.1903	0.5627	0.05151	0.04658	0.09809	0.4813	0.04534	0.03345	0.07879	0.2464	0.006837	0.006519	0.01336	0.2641	0.01504	0.003298	0.01834	0.4673	0.07362	0.02146	0.09508	1.4121	0.6962	0.2431	0.9393	8/8/2012	8/31/2012	F	Y	2	GW	2	1135	1133	5.5	9.5	11.5	12.7	14.6	10.5	15.5	16.9	16.9	17.3	16.2	16.3
1474	0.7217	0.147	0.08223	0.2293	0.5897	0.05886	0.04511	0.104	0.5743	0.058	0.03953	0.09752	0.2838	0.00989	0.005982	0.01587	0.2911	0.01735	0.003176	0.02052	0.6319	0.1012	0.02811	0.1293	1.613	0.9273	0.2733	1.2006	8/14/2012	9/5/2012	M	Y	2	WG	2	1062	1059	6	10.2	13.5	16.4	19.7	20.6	22.2	22.2	22.7	22.7	22.7	23.5
1498	0.8138	0.1799	0.099	0.2789	0.7052	0.07801	0.06001	0.138	0.5737	0.05549	0.04321	0.09869	0.2638	0.008939	0.006188	0.01513	0.3297	0.01885	0.005599	0.02444	0.5844	0.1145	0.03274	0.1473	1.4202	0.7816	0.2234	1.005	8/16/2012	9/10/2012	M	Y	2	GW	2	1009	1012	4.7	9.8	12.5	16.4	18.6	18.8	18.9	18.8	20	21.8	22.7	23.2
1506	0.7728	0.138	0.09268	0.2307	0.5966	0.04752	0.04717	0.09469	0.6097	0.063	0.04454	0.1075	0.2852	0.009463	0.006938	0.0164	0.2942	0.0171	0.003714	0.02082	0.5644	0.07833	0.04166	0.12	2.101	1.2317	0.3668	1.5985	8/16/2012	9/9/2012	F	Y	2	WG	2	1016	1013	5.6	9.4	12.1	14.6	17.3	17.6	17.9	18.6	19.7	19.8	20.3	21.1
1418	0.6446	0.09431	0.06119	0.1555	0.5415	0.04348	0.03152	0.075	0.4804	0.03308	0.02777	0.06084									0.4697	0.06078	0.01903	0.07981	1.4329	0.7513	0.2032	0.9545	7/28/2012	8/21/2012	F	Y	2	GW	2	1082	1080	3.8	7	10.9	10.7	12.9	14.4	14.5	16.2	16.9	18.4	17.8	18.7
1429	0.6893	0.1339	0.07878	0.2127	0.6191	0.06951	0.04956	0.1191	0.535	0.04743	0.03554	0.08297	0.2711	0.008128	0.006413	0.01454	0.2567	0.01467	0.002563	0.01724	0.5087	0.08747	0.01975	0.1072	1.5173	0.8136	0.2236	1.0371	7/30/2012	8/28/2012	M	Y	6	WG	2	736	624	7	8.9	11.6	15	16.3	17.2	17.1	18	18.5	19.3	19.6	20
1437	0.8459	0.1625	0.09365	0.2561	0.7678	0.07687	0.05978	0.1366	0.5528	0.05049	0.03874	0.08922	0.3219	0.01173	0.008182	0.01991	0.3209	0.02063	0.003904	0.02454	0.5789	0.09271	0.02482	0.1175	1.4351	0.8317	0.2256	1.0573	8/6/2012	9/3/2012	M	Y	2	GW	2	1010	1012	5.6	9.8	12.8	16.6	17.7	17.6	18.4	18.2	18.7	19.2	19.3	21.8
1453	0.7255	0.1395	0.09474	0.2342	0.6005	0.06101	0.04433	0.1053	0.5733	0.05858	0.03717	0.09575	0.2707	0.008117	0.006512	0.01463	0.281	0.01658	0.002746	0.01932	0.5365	0.0827	0.02196	0.1047	1.413	0.6624	0.2025	0.8648	8/8/2012	8/31/2012	M	Y	2	GW	2	1135	1133	4.7	9	11.3	13.2	15.3	15.5	16.8	17.6	18	19.2	19	20
1460	0.8696	0.1991	0.1226	0.3217	0.6906	0.07968	0.05468	0.1344	0.6119	0.06769	0.04399	0.1117	0.2903	0.01053	0.007782	0.01831	0.2649	0.01628	0.002854	0.01913	0.6312	0.0989	0.02893	0.1278	1.4845	0.8239	0.2304	1.0543	8/8/2012	8/31/2012	M	Y	2	GW	2	1132	1131	5.3	8.5	11.4	14.3	18	20.4	21.1	22.5	22.9	24.7	24.7	26.3
1491	0.5905	0.09464	0.06637	0.161	0.4957	0.03608	0.03501	0.07109	0.4421	0.03736	0.02638	0.06374	0.2326	0.006561	0.006468	0.01303	0.2212	0.01062	0.003068	0.01369	0.4584	0.07236	0.02201	0.09436	1.3162	0.7049	0.1944	0.8993	8/15/2012	9/8/2012	F	Y	2	WG	2	1146	1144	5.9	9.9	10.5	12.4	12.7	14.3	14.8	14.5	16.1	16.4	13.8	16.1
1499	0.7549	0.143	0.08561	0.2286	0.5671	0.04086	0.0367	0.07756	0.55	0.0479	0.03391	0.08181	0.2963	0.008162	0.007318	0.01548	0.249	0.01101	0.002473	0.01349	0.5304	0.07701	0.02227	0.09928	1.701	0.8545	0.2645	1.119	8/16/2012	9/10/2012	F	Y	2	GW	2	1009	1012	5.4	10.4	13.1	13.6	16.1	18.4	18.2	17.4	18.5	19.2	19	18.7
1507	0.5568	0.07538	0.05574	0.1311	0.4443	0.03207	0.02264	0.05471	0.3802	0.02622	0.01879	0.04501	0.1988	0.004723	0.003658	0.008381	0.2095	0.009317	0.002238	0.01156	0.4189	0.05417	0.01985	0.07402	1.5012	0.768922	0.204968	0.9614	8/16/2012	9/10/2012	F	Y	2	WG	2	1149	1151	4.4	7.6	9.5	11.2	12.9	13.4	14.1	14.3	15	15.2	15.3	15.7
1413	0.6747	0.1298	0.07624	0.206	0.5829	0.05439	0.04499	0.09938	0.5723	0.05906	0.03863	0.09769	0.2591	0.007003	0.006739	0.01374	0.2606	0.01271	0.003385	0.01609	0.5806	0.08038	0.02233	0.1027	1.7295	0.9264	0.2963	1.2226	7/28/2012	8/16/2012	F	Y	2	WG	2	1016	1013	6.4	10.7	12.6	14.4	15.9	16.1	16.9	18.3	17.9	18.2	18.1	17.7
1438	0.6927	0.1331	0.08727	0.2204	0.5999	0.05745	0.04564	0.1031	0.5003	0.05031	0.03299	0.0833	0.2457	0.008878	0.004368	0.01325	0.2306	0.01092	0.002947	0.01386	0.4496	0.07008	0.02132	0.0914	1.5076	0.8513	0.2218	1.0731	8/6/2012	9/3/2012	M	Y	2	GW	2	1010	1012	5.2	9.3	12.1	14.7	16.8	17	17.6	17.4	18.3	19.1	18.9	20.5
1454	0.7455	0.1513	0.08125	0.2326	0.6497	0.07312	0.04927	0.1224	0.5671	0.05666	0.04126	0.09792	0.2613	0.008118	0.006326	0.01444	0.2688	0.01618	0.003116	0.01929	0.524	0.07236	0.02474	0.09709	1.488	0.8695	0.2257	1.0952	8/8/2012	8/31/2012	M	Y	2	GW	2	1135	1133	4.9	8.8	11.4	13.7	16.8	17.4	17.3	18.2	17.9	18.6	19	18.2
1476	0.6436	0.1127	0.07386	0.1865	0.5839	0.04736	0.04391	0.09127	0.5123	0.04222	0.03191	0.07413	0.2577	0.007229	0.005523	0.01275	0.2434	0.0122	0.002444	0.01465	0.4891	0.08016	0.0182	0.09836	1.4549	0.7874	0.2227	1.01	8/15/2012	9/12/2012	M	Y	2	WG	2	1098	1099	4.6	7.9	10	12.7	14	14.2	15.1	14.9	16.3	17.6	17.9	18.5
1484	0.6786	0.1009	0.0649	0.1658	0.5051	0.03616	0.03099	0.06715	0.514	0.04739	0.02904	0.07643	0.2469	0.007393	0.005979	0.01337	0.2679	0.01255	0.003438	0.01599	0.4966	0.06585	0.02814	0.09399	1.4755	0.7031	0.2389	0.942	8/15/2012	9/8/2012	F	Y	2	WG	2	1145	1150	6.2	9.8	11.9	14.2	14.9	14.6	14.8	15.4	16.8	17	15.9	17.1
1492	0.7257	0.1423	0.08876	0.231	0.5716	0.0576	0.04032	0.09792	0.5424	0.0547	0.03814	0.09285	0.2638	0.007974	0.006896	0.01487	0.2626	0.01508	0.003383	0.01846	0.4846	0.08462	0.01612	0.1007	1.4941	0.7746	0.2319	1.0065	8/15/2012	9/8/2012	M	Y	2	WG	2	1146	1144	4.9	8.9	10.5	12.3	16.6	17	17.2	16.6	18	17.5	19.7	19.2
1500	0.6325	0.09869	0.05918	0.1579	0.5016	0.03299	0.02809	0.06108	0.4869	0.03706	0.02467	0.06173	0.2246	0.005563	0.004798	0.01036	0.2166	0.007812	0.002527	0.01034	0.4264	0.06002	0.02605	0.08607	1.8695	1.0277	0.2849	1.3125	8/16/2012	9/9/2012	F	Y	2	WG	2	1016	1013	5.7	9.6	11.2	13.5	15.2	15.6	15.7	15.4	17.1	18.5	19.3	19.9
1420	0.7793	0.1571	0.1011	0.2582	0.6875	0.08914	0.06071	0.1498	0.5475	0.05343	0.04208	0.09551	0.2804	0.009768	0.007996	0.01776	0.3066	0.02173	0.003441	0.02517	0.556	0.09408	0.0238	0.1179	1.6114	0.9615	0.2323	1.1938	7/28/2012	8/21/2012	M	Y	2	GW	2	1082	1080	5.2	8.6	11.5	14.6	16.9	16.6	17.7	19.7	18.8	19.9	19.9	20
1439	0.5841	0.08629	0.05645	0.1427	0.5424	0.04064	0.03788	0.07853	0.4648	0.03526	0.02584	0.0611	0.2249	0.00589	0.005272	0.01116	0.2409	0.0125	0.002673	0.01517	0.4466	0.05815	0.02032	0.07847	1.5778	0.8129	0.2331	1.046	8/6/2012	9/3/2012	F	Y	2	GW	2	1010	1012	4.5	8.8	11	12.6	14.6	14.7	15.8	14.5	15.8	15.9	15.6	14.6
1455	0.7862	0.1698	0.1213	0.2911	0.693	0.08503	0.06689	0.1519	0.6243	0.07311	0.05104	0.1241	0.2783	0.009265	0.007464	0.01673	0.295	0.01829	0.003911	0.0222	0.5505	0.09097	0.02393	0.1149	1.585	0.846	0.2565	1.1025	8/8/2012	8/31/2012	M	Y	2	GW	2	1132	1131	5.4	8.9	11.9	14.5	17.5	19.7	21.4	23.1	21.8	23.9	23.1	24.4
1462	0.7176	0.1358	0.07782	0.2136	0.6428	0.05356	0.04691	0.1005	0.5008	0.03606	0.02514	0.0612	0.251	0.006856	0.004675	0.01153	0.2109	0.009466	0.001572	0.01104	0.4395	0.06624	0.01458	0.08082	1.6898	0.8766	0.2522	1.1288	8/10/2012	8/29/2012	F	Y	2	WG	2	1096	1097	5	8.6	10.7	12.3	15.2	15.2	15.5	15.2	15	17.1	17.1	17.7
1477	0.5982	0.08354	0.058	0.1415	0.5054	0.03582	0.03121	0.06703	0.4648	0.03541	0.02625	0.06166	0.2112	0.004804	0.003684	0.008489	0.2459	0.01126	0.002469	0.01373	0.4142	0.05423	0.0181	0.07233	1.5021	0.7261	0.2245	0.9507	8/15/2012	9/12/2012	F	Y	2	WG	2	1098	1099	4.4	7.4	9.8	10.6	12.8	13.2	13.8	13.4	13.7	14.2	14.4	14.4
1485	0.7846	0.1661	0.09613	0.2622	0.6321	0.06901	0.04598	0.115	0.5891	0.06219	0.04035	0.1025	0.2661	0.008815	0.00683	0.01564	0.301	0.02107	0.00365	0.02472	0.5584	0.08452	0.028	0.1125	1.849	1.0822	0.2681	1.3503	8/15/2012	9/8/2012	M	Y	2	WG	2	1145	1150	5.5	8.9	12	14.7	18.3	18.7	18.9	19.2	19.8	21.2	21.5	22.5
1501	0.7936	0.185	0.1179	0.3029	0.6464	0.07311	0.05286	0.126	0.5909	0.07375	0.04454	0.1183	0.2491	0.008073	0.006055	0.01413	0.2906	0.0168	0.004718	0.02152	0.5664	0.09924	0.03096	0.1302	1.6501	0.9749	0.2546	1.2295	8/16/2012	9/9/2012	M	Y	2	WG	2	1016	1013	5.5	9.8	12.4	15.8	21.4	21.7	23.1	23	24	24.1	23.9	24.8
1432	0.684	0.1035	0.07287	0.1763	0.5542	0.04213	0.03119	0.07332	0.4778	0.03595	0.02268	0.05863	0.2299	0.006243	0.004514	0.01076	0.2179	0.01071	0.00204	0.01275	0.4232	0.0698	0.01419	0.08399	1.6213	0.7808	0.2589	1.0397	7/30/2012	8/28/2012	F	Y	6	WG	2	736	624	6.8	8.9	10.9	12.7	13.6	14.6	15.5	16.3	16.2	17.1	16.7	16.9
1448	0.6868	0.1458	0.0777	0.2235	0.5758	0.06774	0.04645	0.1142	0.5048	0.04926	0.0348	0.08406	0.2496	0.00855	0.005779	0.01433	0.2551	0.01289	0.003186	0.01608	0.5629	0.08039	0.02261	0.103	1.3066	0.6398	0.1889	0.8288	8/8/2012	8/31/2012	M	Y	2	GW	2	1135	1133	5.4	9.8	12.4	14.2	16.2	16.6	16.9	17.5	17.2	18.2	18.1	19.2
1456	0.6976	0.1303	0.07399	0.2043	0.5966	0.05528	0.04769	0.103					0.2665	0.007862	0.00683	0.01469	0.2715	0.01422	0.003372	0.01759	0.4445	0.07161	0.0223	0.09391	1.602	0.8368	0.2304	1.0672	8/8/2012	8/31/2012	F	Y	2	GW	2	1132	1131	5.1	8.5	11.8	14.1	17.2	17.1	16.6	17.1	17.6	18.3	17.3	17.6
1470	0.7605	0.1502	0.08973	0.2399	0.6544	0.06532	0.05082	0.1161	0.6051	0.06267	0.03639	0.09906	0.2881	0.01106	0.005966	0.01702	0.2632	0.01377	0.003282	0.01705	0.5704	0.09011	0.02508	0.1152	1.5707	0.805	0.247	1.0519	8/14/2012	9/5/2012	M	Y	2	WG	2	1062	1059	4.8	8.6	11.1	15.5	19.4	18	19.4	20	21.3	21.6	21.8	22.9
1478	0.7066	0.1203	0.07949	0.1998	0.568	0.04645	0.03536	0.08181	0.539	0.05169	0.03454	0.08623	0.2416	0.0065	0.00555	0.01205	0.2185	0.009023	0.002014	0.01104	0.4648	0.06552	0.02392	0.08945	1.5934	0.8974	0.2326	1.1301	8/15/2012	9/12/2012	F	Y	2	WG	2	1098	1099	4.7	8	10.2	12.4	15.3	16.3	16.7	16.5	17.3	17.7	18	18.3
1494	0.5706	0.08925	0.05984	0.1491	0.4763	0.03059	0.02872	0.05931	0.4766	0.04067	0.02754	0.0682	0.2345	0.006398	0.005752	0.01215	0.2384	0.01219	0.003017	0.01521	0.4808	0.06708	0.01554	0.08262	1.883	0.8395	0.2607	1.1002	8/15/2012	9/8/2012	F	Y	2	WG	2	1146	1144	5.4	9.2	10.3	12.6	13.4	14.3	14.5	14.2	15.8	16.7	14.9	15.7
1502	0.609	0.0992	0.06137	0.1606	0.4722	0.02979	0.0267	0.0565	0.4553	0.03745	0.02578	0.06322	0.2216	0.004978	0.004769	0.009746	0.2355	0.01095	0.002641	0.01359	0.5526	0.08855	0.03566	0.1242	1.7391	0.9123	0.2691	1.1814	8/16/2012	9/9/2012	F	Y	2	WG	2	1016	1013	5.1	9	11.1	12.5	13.8	14.3	14.4	14.1	15.1	14.9	15.4	15
1513	0.6216	0.1099	0.07258	0.1825	0.4694	0.03149	0.02438	0.05587	0.4984	0.04486	0.02789	0.07275	0.2564	0.007084	0.005901	0.01299	0.2584	0.01206	0.002885	0.01495	0.5528	0.07974	0.02283	0.1026	1.3582	0.6315	0.2106	0.8421	8/17/2012	9/12/2012	F	Y	2	WG	2	1147	1148	4.1	8.3	10.3	12	13.6	14.9	14.6	14.2	15.1	15.4	15.2	15.6
1518	0.7345	0.1391	0.08228	0.2214	0.6186	0.06706	0.03971	0.1068	0.5145	0.04432	0.03635	0.08068	0.2487	0.007196	0.005381	0.01258	0.2727	0.01679	0.002928	0.01971	0.4566	0.07466	0.02638	0.101	1.5351	0.8458	0.217	1.0628	8/17/2012	9/8/2012	M	Y	2	GW	2	1084	1081	4.9	9.4	10.7	15	20.4	19.6	19.5	20	20.5	21.1	20.6	21.1
1527	0.7015	0.1267	0.07737	0.2041	0.4962	0.04097	0.03094	0.07191	0.5042	0.04504	0.03131	0.07635	0.2402	0.006348	0.005535	0.01188	0.2402	0.01171	0.002814	0.01452	0.5135	0.08924	0.02966	0.1189	1.4042	0.6527	0.1948	0.8475	8/21/2012	9/14/2012	M	Y	2	WG	2	1061	1063	5.2	8.2	10.8	12.4	15.6	17	16.6	17.4	16.7	16.9	17.1	17.8
1535	0.6371	0.09759	0.0694	0.167	0.479	0.03576	0.02394	0.0597	0.5029	0.04125	0.02914	0.07039	0.2549	0.005923	0.005775	0.0117	0.2589	0.0114	0.002746	0.01415	0.4903	0.0744	0.01772	0.09213	1.5854	0.8769	0.2368	1.1138	8/21/2012	9/15/2012	F	Y	2	GW	2	1082	1080	4.9	8.7	10.1	12.3	14.3	15.3	15.4	15.7	15.8	15.8	15.6	16.5
1543	0.7726	0.1695	0.09884	0.2684	0.6152	0.06919	0.04954	0.1187	0.5611	0.05808	0.04304	0.1011	0.2776	0.009038	0.007303	0.01634	0.2812	0.01595	0.00302	0.01897	0.5212	0.1033	0.02621	0.1295	1.6816	0.9361	0.2769	1.2129	8/31/2012	9/26/2012	M	Y	2	GW	2	1135	1133	5.6	9.6	12.6	16.4	21.1	20.3	21.3	21.7	21.8	22.2	22.1	22.6
1551	0.8731	0.1963	0.1159	0.3123	0.6813	0.07514	0.06424	0.1394	0.5692	0.06268	0.04041	0.1031	0.2821	0.00849	0.006489	0.01498	0.2754	0.01431	0.002946	0.01725	0.5472	0.08539	0.03411	0.1195	1.6269	0.8172	0.2367	1.0539	9/1/2012	9/25/2012	M	Y	2	GW	2	1132	1131	5.7	10.4	13	15.5	18.4	20.1	20.5	20.7	21	21	21.4	21.2
1559	0.7214	0.1391	0.08513	0.2242	0.6025	0.05932	0.04755	0.1069	0.5526	0.05251	0.03943	0.09194	0.2448	0.007762	0.005929	0.01369	0.2874	0.01834	0.003182	0.02152	0.4627	0.07255	0.0301	0.1027	1.5327	0.8909	0.2322	1.1231	8/29/2012	9/21/2012	M	Y	2	WG	2	1018	1015		6.6	9.1	13.1	16.9	17	19.3	19.9	20.9	22.3	20.9	22.4
1566	0.7804	0.1374	0.1067	0.2441	0.5445	0.04735	0.03965	0.08699	0.6574	0.07558	0.04896	0.1245	0.3084	0.009987	0.008973	0.01896	0.2928	0.01579	0.003798	0.01959	0.6095	0.08752	0.02902	0.1165	2.0421	1.279	0.344	1.623	8/29/2012	9/21/2012	F	Y	2	WG	2	1096	1097		8.5	9.6	11.4	13	14.6	14.9	15.7	15.2	16.6	14.4	15.5
1578	0.6288	0.09849	0.06148	0.16	0.5233	0.03708	0.03162	0.06869	0.463	0.04094	0.02311	0.06405	0.2612	0.006833	0.006078	0.01291	0.2392	0.008648	0.002522	0.01117	0.4131	0.05863	0.01592	0.07455	1.3886	0.649	0.1943	0.8433	9/7/2012	10/3/2012	F	Y	2	WG	2	1145	1150	4.3	8.2	9.5	11	13.2	14.2	14	14.2	14.9	14.5	14.8	14.2
1586	0.6147	0.1026	0.06278	0.1654	0.5072	0.03755	0.03206	0.0696	0.4481	0.03502	0.02895	0.06397	0.2111	0.005247	0.004091	0.009338	0.2308	0.0107	0.00202	0.01272	0.3947	0.05394	0.01517	0.06911	1.4429	0.7176	0.225	0.9426	9/7/2012	10/3/2012	F	Y	2	WG	2	1146	1144	4.3	7.5	9.6	10.8	12.7	12.9	14.9	14.2	14.3	15.5	15.5	15
1511	0.8304	0.1803	0.1211	0.3014	0.7023	0.0803	0.06848	0.1488	0.5891	0.06634	0.0421	0.1084	0.2672	0.009286	0.006367	0.01565	0.3177	0.01834	0.005944	0.02428	0.5685	0.08606	0.02612	0.1122	1.6008	0.9121	0.2284	1.1405	8/16/2012	9/10/2012	M	Y	2	WG	2	1149	1151	4.4	7.8	10	14.7	17.9	18.2	19.7	20.8	22.9	23.7	23.6	24.2
1519	0.7792	0.1609	0.1089	0.2698	0.641	0.06594	0.05224	0.1182	0.619	0.0675	0.04506	0.1126	0.3002	0.008696	0.007982	0.01668	0.2882	0.01563	0.003919	0.01955	0.5921	0.08505	0.02808	0.1131	1.8324	1.0835	0.2971	1.3806	8/17/2012	9/8/2012	F	Y	2	GW	2	1084	1081	6.2	11.2	12.6	15.1	17.5	18	18.7	18.6	20.6	21.5	20.6	21.8
1528	0.7897	0.18	0.1075	0.2874	0.6889	0.0862	0.05901	0.1452	0.5885	0.06394	0.04045	0.1044	0.2788	0.01019	0.005715	0.0159	0.3184	0.02302	0.003978	0.02699	0.5545	0.08044	0.02477	0.1052	1.6709	0.9401	0.2582	1.1983	8/21/2012	9/14/2012	M	Y	2	WG	2	1061	1063	5.1	8	10.9	14.8	17.2	18.4	19.3	20.6	20.7	21.2	21.6	23.3
1536	0.7277	0.1449	0.07702	0.222	0.5928	0.06218	0.04005	0.1022	0.5139	0.04668	0.03821	0.08489	0.2695	0.008438	0.006393	0.01483	0.2808	0.0152	0.003941	0.01914	0.5489	0.09208	0.0317	0.1238	1.4587	0.7585	0.2335	0.992	8/21/2012	9/15/2012	M	Y	2	GW	2	1082	1080	5.8	9.5	11.2	15.5	19	18.4	17.6	18.9	19.3	19.9	20.3	20.7
1544	0.6186	0.09412	0.06996	0.1641	0.4778	0.03209	0.0251	0.05719	0.4476	0.03151	0.02412	0.05564	0.2324	0.005983	0.004881	0.01086	0.2303	0.009971	0.002442	0.01241	0.5058	0.07602	0.02712	0.1031	1.5214	0.6728	0.2373	0.9101	8/31/2012	9/26/2012	F	Y	2	GW	2	1135	1133	4.5	8.2	10	11.3	14.2	15	16.2	15.5	15.4	15.4	16.3	16.2
1552	0.8366	0.1606	0.1112	0.2718	0.7167	0.09169	0.05536	0.1471	0.56	0.05437	0.04297	0.09735	0.2461	0.007756	0.006027	0.01378	0.2821	0.0172	0.003643	0.02084	0.5936	0.08626	0.03205	0.1183	1.6394	0.9028	0.2368	1.1396	9/1/2012	9/25/2012	M	Y	2	GW	2	1132	1131	5.9	10.7	12.2	14	17	18.1	18	18.9	18.9	20.5	20.8	21
1560	0.8718	0.1731	0.1061	0.2792	0.5973	0.04637	0.03674	0.08311	0.6493	0.06023	0.04778	0.108	0.329	0.01124	0.00855	0.01979	0.2714	0.01526	0.002642	0.0179	0.5328	0.0824	0.02637	0.1088	1.6753	0.9728	0.2582	1.231	8/29/2012	9/21/2012	F	Y	2	WG	2	1018	1015		7	8.2	9.7	11.5	12.6	13.1	13	13.4	14.7	14.5	14.8
1567	0.6983	0.1361	0.07593	0.2121	0.6119	0.05843	0.04678	0.1052	0.4902	0.0436	0.02852	0.07212	0.2388	0.006852	0.004944	0.0118	0.2463	0.01277	0.002291	0.01506	0.4325	0.06955	0.02316	0.09271	1.4042	0.7107	0.2155	0.9262	8/29/2012	9/21/2012	M	Y	2	WG	2	1096	1097		8.9	10.7	13.8	19.2	19.3	20.1	20.2	20.7	22.4	21.6	22.8
1512	0.6127	0.09038	0.05359	0.144	0.5069	0.03627	0.03022	0.06649	0.4466	0.0371	0.0239	0.061	0.2529	0.006767	0.005655	0.01242	0.2468	0.01116	0.003299	0.01446	0.4786	0.06264	0.01918	0.08182	1.8875	0.9314	0.2582	1.1896	8/16/2012	9/10/2012	F	Y	2	WG	2	1149	1151	4.7	8.3	10	11.7	13.4	14.2	13.6	14.1	15.1	13.7	14.1	14.8
1520	0.7136	0.1229	0.06643	0.1893	0.5688	0.04393	0.03884	0.08278	0.5218	0.04243	0.02784	0.07027	0.2615	0.008266	0.004749	0.01301	0.2662	0.01196	0.002887	0.01485	0.5192	0.07443	0.02563	0.1001	1.801	0.8986	0.2369	1.1355	8/17/2012	9/8/2012	F	Y	2	GW	2	1084	1081	5	9.4	11	13.1	14.9	15.8	16.3	16.4	16.8	17.2	17.6	18.5
1529	0.5601	0.1065	0.05089	0.1573	0.4603	0.03204	0.02925	0.06129	0.4643	0.03611	0.02496	0.06107	0.2319	0.006284	0.003967	0.01025	0.2545	0.01323	0.002993	0.01623	0.4511	0.0639	0.01942	0.08332	1.563	0.7851	0.2229	1.008	8/21/2012	9/14/2012	F	Y	2	WG	2	1061	1063	5.4	8	11.4	13.7	15.1	15.3	16.2	15.8	16	16.3	15.9	16.7
1537	0.8526	0.1857	0.1219	0.3077	0.722	0.08114	0.06844	0.1496	0.6245	0.07009	0.04527	0.1154	0.2812	0.009163	0.007187	0.01635	0.2874	0.01647	0.002968	0.01944	0.5536	0.09031	0.02955	0.1199	1.756	1.0692	0.2816	1.3509	8/21/2012	9/15/2012	M	Y	2	GW	2	1082	1080	5.7	9.6	11.5	14.9	17.6	17.7	18	19.1	19.8	20.7	20.9	22.1
1553	0.7311	0.1301	0.07858	0.2087	0.653	0.06146	0.04822	0.1097	0.5503	0.05418	0.03206	0.08624	0.244	0.006362	0.00569	0.01205	0.2573	0.01431	0.00264	0.01695	0.5128	0.07533	0.02085	0.09618	1.6178	0.911	0.2505	1.1615	9/1/2012	9/25/2012	M	Y	2	GW	2	1132	1131	5	9.8	11.3	13.7	16.8	18.1	18.8	19.3	19.4	20.5	20.5	21.2
1568	0.7314	0.1437	0.09554	0.2393	0.5675	0.06001	0.03704	0.09705					0.2742	0.01023	0.006214	0.01645	0.3018	0.01758	0.004254	0.02184					1.7868	1.0998	0.2963	1.3961	8/29/2012	9/21/2012	F	Y	2	WG	2	1096	1097		9	10.5	12.8	14.7	16	16.6	17.4	17.2	18.3	16.5	18.1
1572	0.6359	0.1044	0.06158	0.166	0.5122	0.03781	0.03268	0.07049	0.4728	0.03867	0.02549	0.06416	0.2262	0.005509	0.003982	0.009492	0.2179	0.009367	0.001998	0.01136	0.3956	0.05904	0.0157	0.07474	1.5017	0.8165	0.2188	1.0354	9/7/2012	9/29/2012	F	Y	2	GW	2	1011	1083	5.3	9.2	10.6	12.2	13.4	14.1	14.6	15	15.4	15.6	15.3	14.9
1580	0.5594	0.0858	0.05337	0.1392	0.4585	0.03412	0.02566	0.05978	0.4368	0.03688	0.02369	0.06057	0.2106	0.005894	0.004774	0.01067	0.2503	0.01378	0.003044	0.01682	0.5072	0.06848	0.01958	0.08806	1.6236	0.7832	0.2378	1.021	9/7/2012	10/3/2012	F	Y	2	WG	2	1145	1150	5.3	9.2	11.4	12.2	13.7	14.7	14.9	14.8	14.4	14.3	14.1	14.6
1510	0.7403	0.1338	0.07453	0.2083	0.5792	0.05506	0.04352	0.09858	0.5267	0.05108	0.03084	0.08191	0.2448	0.007073	0.005613	0.01269	0.2658	0.01414	0.003017	0.01716	0.4369	0.0704	0.02114	0.09154	1.6534	0.9911	0.2817	1.2728	8/16/2012	9/10/2012	M	Y	2	WG	2	1149	1151	4.6	8	9.5	12.1	16.4	16.8	17.2	17.6	17.8	18.2	18.6	19.4
1521	0.786	0.1679	0.1156	0.2835	0.6394	0.07011	0.04963	0.1197	0.5576	0.06118	0.03925	0.1004	0.2712	0.008253	0.006457	0.01471	0.2613	0.01422	0.002606	0.01682	0.4508	0.08154	0.02555	0.1071	1.4444	0.794	0.1922	0.9862	8/17/2012	9/8/2012	M	Y	2	GW	2	1084	1081	5.1	9.1	9.6	14.7	19.4	18.4	19.1	19.5	20.2	21.4	21.4	21.7
1530	0.5672	0.08534	0.05515	0.1405	0.4948	0.03992	0.02666	0.06659	0.437	0.03336	0.02181	0.05517	0.2414	0.006404	0.005183	0.01159	0.2644	0.01191	0.002809	0.01472	0.5165	0.06588	0.02712	0.09301	1.5917	0.8498	0.2231	1.0729	8/21/2012	9/14/2012	M	Y	2	WG	2	1061	1063	5.6	8.2	11.5	14.2	16.9	17.8	17.9	18.9	18.6	19.6	20.1	20.8
1538	0.7197	0.1443	0.07968	0.224	0.6032	0.06155	0.04818	0.1097	0.5249	0.04643	0.03289	0.07932	0.2856	0.009098	0.006571	0.01567	0.2762	0.0145	0.003461	0.01796	0.5497	0.09306	0.03196	0.125	1.6091	0.8436	0.2256	1.0692	8/21/2012	9/15/2012	M	Y	2	GW	2	1082	1080	5.4	8.9	10.4	12.7	14.8	16.2	16.3	17.8	18.8	18.7	18.6	19.6
1546	0.6544	0.1073	0.07766	0.1849	0.4688	0.03608	0.02757	0.06364	0.5385	0.05338	0.03585	0.08923	0.2353	0.007188	0.005117	0.0123	0.2448	0.01332	0.002918	0.01624	0.4864	0.07803	0.02169	0.09972	1.5729	0.8097	0.2441	1.0537	8/31/2012	9/26/2012	F	Y	2	GW	2	1135	1133	5	8.8	10.5	11.8	15.5	16.6	17.3	16.4	16.9	17	16.5	16.8
1554	0.7745	0.1643	0.1027	0.267	0.6657	0.07531	0.06411	0.1394	0.5573	0.06469	0.04497	0.1097	0.2787	0.01093	0.007666	0.0186	0.2917	0.01681	0.004178	0.02099	0.6296	0.1005	0.0413	0.1418	1.9328	1.293	0.2915	1.5845	8/29/2012	9/21/2012	M	Y	2	WG	2	1018	1015		8.4	10.1	12.7	16.6	17.2	19.4	19.8	20.1	21.1	19.9	21.5
1561	0.6276	0.1126	0.06736	0.1799	0.5395	0.05344	0.03901	0.09244	0.5289	0.04292	0.03921	0.08212	0.24	0.007199	0.005532	0.01273	0.2355	0.01257	0.002142	0.01471	0.5007	0.08015	0.02279	0.1029	1.5075	0.9289	0.2385	1.1673	8/29/2012	9/21/2012	M	Y	2	WG	2	1018	1015		7.2	8.9	10.9	13.9	14.9	16.3	16.9	17.3	18.4	17.5	18.6
1573	0.6319	0.1074	0.06309	0.1705	0.5221	0.03821	0.03367	0.07188	0.4802	0.03992	0.02803	0.06795	0.2459	0.005858	0.005069	0.01093	0.2327	0.009389	0.002715	0.0121	0.5074	0.07068	0.01982	0.0905	1.5424	0.8929	0.2161	1.109	9/7/2012	9/29/2012	F	Y	2	GW	2	1011	1083	5.6	9.5	10.7	12.1	13.8	14.7	14.9	14.8	16.2	15.6	15.2	14.9
1581	0.5411	0.08814	0.04816	0.1363	0.4221	0.03014	0.02307	0.05322	0.4631	0.04027	0.02878	0.06905	0.2576	0.009044	0.006453	0.0155	0.2748	0.01458	0.005085	0.01966	0.498	0.07117	0.01763	0.0888	1.4356	0.727	0.2227	0.9497	9/7/2012	10/3/2012	F	Y	2	WG	2	1145	1150	5	8.8	9.9	11.1	12.5	13.3	14.1	14.3	14.5	14.8	15.6	14.8
1514	0.8004	0.1412	0.09158	0.2328	0.6145	0.0492	0.03994	0.08913	0.5329	0.04444	0.03515	0.07959	0.2594	0.007926	0.005716	0.01364	0.2691	0.01278	0.002818	0.0156	0.5875	0.09213	0.03442	0.1266	1.8038	0.8973	0.2751	1.1723	8/17/2012	9/12/2012	F	Y	2	WG	2	1147	1148	5.2	9.4	10.6	12.4	15.2	16.6	15.7	16.7	17.1	19.5	19.3	21
1522	0.7733	0.1632	0.1026	0.2658	0.6081	0.06218	0.04902	0.1112	0.5608	0.06053	0.03999	0.1005	0.2618	0.007589	0.005772	0.01336	0.2791	0.016	0.003594	0.0196	0.465	0.08116	0.02181	0.103	1.7585	0.8786	0.2887	1.1673	8/17/2012	9/8/2012	M	Y	2	GW	2	1084	1081	6.2	10.1	10.5	13.4	18.4	19.1	19	19.8	21	21.8	21	21.5
1531	0.7015	0.1366	0.0876	0.2242	0.5627	0.06468	0.04022	0.1049	0.5177	0.05399	0.03529	0.08928	0.251	0.00768	0.006497	0.01418	0.2962	0.01829	0.004237	0.02253	0.4858	0.07157	0.02575	0.09733	1.6972	0.9704	0.2638	1.2343	8/21/2012	9/14/2012	M	Y	2	WG	2	1061	1063	5.3	8.4	12	15.9	18.2	17.8	18.2	19.1	18.2	18.4	19.2	20.3
1539	0.6135	0.09781	0.06061	0.1584	0.5251	0.04009	0.03673	0.07682	0.4863	0.04327	0.02968	0.07295	0.2368	0.006387	0.005095	0.01148	0.2426	0.01375	0.002695	0.01644	0.4612	0.07291	0.02153	0.09444	1.5006	0.8292	0.2307	1.0598	8/21/2012	9/15/2012	F	Y	2	GW	2	1082	1080	5.4	9.1	9.9	10.5	12.1	13.4	13.9	14.4	14.8	14.7	15.3	16.2
1547	0.6663	0.1075	0.07733	0.1848	0.5249	0.04034	0.03077	0.07111	0.5315	0.04908	0.03353	0.08262	0.2043	0.005113	0.004296	0.009409	0.2406	0.01031	0.003657	0.01397	0.5057	0.07667	0.02608	0.1028	1.6422	0.8263	0.2428	1.0691	8/31/2012	9/26/2012	F	Y	2	GW	2	1135	1133	4.9	8.7	10.7	12	13.9	14.2	15.7	15	14.9	14.7	14.7	15.4
1555	0.6824	0.1232	0.07046	0.1936	0.5617	0.05013	0.03992	0.09005	0.5262	0.04739	0.03148	0.07886	0.2517	0.007547	0.005549	0.0131	0.2677	0.01351	0.003215	0.01673	0.4716	0.06517	0.02341	0.08857	1.4641	0.8013	0.2216	1.0229	8/29/2012	9/21/2012	M	Y	2	WG	2	1018	1015		7.5	9.4	13.8	17.6	17.4	18.7	18.7	18.7	20.5	19.8	20.9
1562	0.611	0.09941	0.07659	0.176	0.5941	0.05986	0.0479	0.1078	0.4954	0.04522	0.03327	0.07849	0.2635	0.00835	0.006713	0.01506	0.2789	0.01547	0.003367	0.01884	0.5289	0.07499	0.02482	0.09981	1.4783	0.6913	0.2235	0.9148	8/29/2012	9/21/2012	M	Y	2	WG	2	1018	1015		7.1	8.5	11.8	14.7	14.5	15.1	15	15.4	16.4	15.6	16.6
1570	0.6777	0.1149	0.07861	0.1936	0.5583	0.05249	0.03646	0.08895	0.5095	0.04891	0.03496	0.08386	0.2508	0.0072	0.006241	0.01344	0.2784	0.0149	0.004048	0.01895	0.5827	0.08494	0.02705	0.112	1.5611	0.8678	0.2403	1.1081	8/29/2012	9/21/2012	M	Y	2	WG	2	1096	1097		8.6	10.8	12.6	17.2	17.3	17.6	18.5	18.7	19.5	18.7	19.7
1574	0.7857	0.1721	0.09846	0.2705	0.6894	0.07184	0.06062	0.1325	0.5697	0.0646	0.03813	0.1027	0.2995	0.01128	0.006272	0.01755	0.2943	0.01886	0.002974	0.02183	0.46	0.08968	0.02092	0.1106	1.5093	0.914	0.2305	1.1445	9/7/2012	9/29/2012	M	Y	2	GW	2	1011	1083	4.7	8.2	10.6	15.3	18.7	20.3	21.1	21.6	23.2	24.3	25.8	25.1
1515	0.6357	0.1024	0.06758	0.17	0.4919	0.03624	0.02924	0.06549	0.5284	0.04915	0.0343	0.08345	0.2432	0.006984	0.005836	0.01282	0.2629	0.01302	0.003327	0.01634	0.4789	0.07296	0.01828	0.09125	1.6597	0.9336	0.2839	1.2175	8/17/2012	9/12/2012	F	Y	2	WG	2	1147	1148	5.5	9.2	10.8	12.7	14.8	15.6	14.9	15.5	16.5	16.9	15.8	16
1523	0.7392	0.1634	0.09187	0.2552	0.6133	0.07172	0.04523	0.1169	0.5497	0.06025	0.03996	0.1002	0.2467	0.007747	0.006001	0.01375	0.2823	0.0172	0.003706	0.02091	0.5292	0.09295	0.02045	0.1134	1.5452	0.9225	0.2377	1.1602	8/17/2012	9/8/2012	M	Y	2	GW	2	1084	1081	5.8	9.6	10.3	13.4	18.4	18.6	18.6	19.6	20.3	20.7	20.3	21.1
1532	0.7462	0.1561	0.09044	0.2465	0.6467	0.06637	0.05799	0.1244	0.5651	0.05325	0.04276	0.09601	0.3017	0.01129	0.0087	0.01999	0.3698	0.02738	0.006089	0.03347	0.4551	0.07632	0.0243	0.1006	1.5307	0.8711	0.255	1.1261	8/21/2012	9/14/2012	M	Y	2	WG	2	1061	1063	4.4	8.3	11.3	15.3	17	18.7	19.3	20.8	21	21	22.6	23.8
1540	0.5991	0.08768	0.05435	0.142	0.4976	0.03984	0.02994	0.06978	0.4451	0.03579	0.02398	0.05976	0.2138	0.005377	0.004286	0.009663	0.2192	0.01045	0.001766	0.01221	0.4489	0.06323	0.02037	0.0836	1.5948	0.8169	0.2329	1.0498	8/21/2012	9/15/2012	F	Y	2	GW	2	1082	1080	4.7	8.2	9.8	11.1	13	14.3	15.2	14.7	15.5	15.1	15.4	16
1548	0.7346	0.1365	0.08624	0.2227	0.5911	0.0557	0.0432	0.0989	0.5438	0.05522	0.03614	0.09136	0.2154	0.005323	0.00495	0.01027	0.2847	0.01912	0.003406	0.02253	0.4768	0.08111	0.02731	0.1084	1.3815	0.7346	0.1874	0.922	8/31/2012	9/26/2012	M	Y	2	GW	2	1135	1133	4.4	7.9	9.6	12.4	16.3	15.8	16	16.7	16.6	17	17.6	17.8
1556	0.761	0.1673	0.0976	0.2649	0.7136	0.08342	0.07082	0.1542	0.5408	0.05302	0.03846	0.09148	0.277	0.009683	0.008445	0.01813	0.2419	0.01184	0.0031	0.01494	0.5148	0.08705	0.02194	0.109	1.7152	1.0717	0.2561	1.3277	8/29/2012	9/21/2012	M	Y	2	WG	2	1018	1015		7.2	9.2	13.2	17.4	17.5	18.8	19.5	19.9	21.7	20.9	22.1
1563	0.6735	0.1143	0.07238	0.1866	0.5751	0.0534	0.04261	0.09601	0.509	0.05027	0.03348	0.08374	0.2391	0.007216	0.005956	0.01317	0.2463	0.01295	0.00363	0.01658	0.4392	0.07456	0.02424	0.0988	1.5083	0.8734	0.2318	1.1052	8/29/2012	9/21/2012	M	Y	2	WG	2	1018	1015		7.8	10.2	13.4	17.4	16.7	18.3	18.3	18.3	20	17.3	18.5
1516	0.5676	0.08498	0.05533	0.1403	0.4883	0.0396	0.02605	0.06565	0.4333	0.03407	0.0217	0.05577	0.2422	0.006276	0.005284	0.01156	0.2497	0.01093	0.002497	0.01343	0.5351	0.07194	0.02859	0.1005	1.5973	0.8043	0.2405	1.0448	8/17/2012	9/12/2012	F	Y	2	WG	2	1147	1148	5.1	9	11.4	12.6	15	15.6	15.1	15.6	16.5	16.3	18.2	17.1
1524	0.7754	0.1468	0.09247	0.2393	0.568	0.04064	0.037	0.07764	0.6084	0.05626	0.04231	0.09857	0.2522	0.007389	0.005935	0.01332	0.2648	0.01237	0.003805	0.01617	0.5296	0.08039	0.02466	0.105	1.7996	0.9587	0.265	1.2237	8/17/2012	9/8/2012	F	Y	2	GW	2	1084	1081	6	10.2	11	13.4	15.2	16.3	16.3	16.1	19	18.3	19.1	19.4
1533	0.6181	0.1165	0.0659	0.1824	0.7309	0.07961	0.05721	0.1368	0.4705	0.03858	0.03114	0.06972	0.2388	0.006971	0.006027	0.013	0.2475	0.01385	0.002836	0.01669	0.5108	0.07725	0.02365	0.1009	1.4315	0.7206	0.212	0.9326	8/21/2012	9/14/2012	F	Y	2	WG	2	1061	1063	5.1	7.8	10.9	12.3	13.4	14.7	15.3	15.5	15.6	16	16.1	16.9
1541	0.6433	0.1075	0.072	0.1795	0.4784	0.02973	0.02818	0.0579	0.4999	0.04235	0.02768	0.07004	0.2295	0.005529	0.004924	0.01045	0.2499	0.01274	0.002568	0.01531	0.5309	0.06981	0.02127	0.09108	1.5666	0.7592	0.2179	0.9771	8/21/2012	9/15/2012	F	Y	2	GW	2	1082	1080	4.5	8.8	10.1	11.7	13.6	14.6	15.2	15.6	15.5	14.9	15.6	16.3
1549	0.7236	0.1393	0.09105	0.2303	0.6546	0.07982	0.05551	0.1353	0.5561	0.05738	0.03717	0.09455	0.2457	0.006615	0.005912	0.01253	0.2938	0.01778	0.003385	0.02117	0.5456	0.09682	0.03218	0.129	1.56	0.8676	0.2431	1.1107	8/31/2012	9/26/2012	M	Y	2	GW	2	1135	1133	5.4	9.3	11.8	15.7	19.7	18.5	19.6	20.2	19.7	20.4	20.5	21.2
1557	0.7106	0.1378	0.07986	0.2177	0.6325	0.07498	0.05484	0.1298	0.5499	0.04815	0.04169	0.08984	0.2574	0.008677	0.00738	0.01606	0.2441	0.01523	0.002581	0.01781	0.4697	0.0772	0.02758	0.1048	1.5289	0.8388	0.2332	1.0721	8/29/2012	9/21/2012	M	Y	2	WG	2	1018	1015		7.1	9.1	12.9	17	17	18.6	19.3	19.7	21.1	20.3	22
1564	0.7129	0.1003	0.07395	0.1742	0.5299	0.03811	0.0294	0.06751	0.5868	0.05213	0.04107	0.0932	0.296	0.009392	0.006674	0.01607	0.2421	0.01403	0.001802	0.01583	0.4632	0.0737	0.01867	0.09237	1.7864	1.1424	0.2936	1.436	8/29/2012	9/21/2012	F	Y	2	WG	2	1018	1015		7	8.1	8.7	10.4	11.6	11.8	12	12.1	12.4	12.6	12.4
1576	0.9387	0.2299	0.1454	0.3753	0.8027	0.1064	0.07981	0.1862	0.6485	0.08354	0.05655	0.1401	0.3326	0.01242	0.009925	0.02234	0.2932	0.01789	0.003882	0.02177	0.5235	0.09075	0.02983	0.1206	1.5913	0.8616	0.2735	1.135	9/7/2012	9/29/2012	M	Y	2	GW	2	1011	1083	6.4	10	12.2	17.6	21.6	23.1	23.1	23.5	24.9	24	24.4	25.5
1584	0.5627	0.08664	0.05684	0.1435	0.4849	0.03385	0.03034	0.06419	0.4688	0.04103	0.02678	0.0678	0.2598	0.007479	0.006618	0.0141	0.2227	0.008656	0.002354	0.01101	0.412	0.05994	0.01822	0.07816	1.461	0.6801	0.2252	0.9053	9/7/2012	10/3/2012	F	Y	2	WG	2	1145	1150	4	7.8	10	11.4	12.9	14.4	14.7	14	14.8	14.4	14.7	14.5
1517	0.6338	0.1211	0.06669	0.1877	0.7257	0.07935	0.05583	0.1352	0.4652	0.03897	0.02969	0.06866	0.2332	0.006881	0.005807	0.01269	0.2452	0.01392	0.00275	0.01667	0.4628	0.06853	0.0216	0.09013	1.417	0.6771	0.2112	0.8883	8/17/2012	9/12/2012	M	Y	2	WG	2	1147	1148	4.9	8.9	11		13.7		16.4	16.9	17.7	18.7	18.2	19
1526	0.6024	0.09352	0.05606	0.1496	0.4946	0.0399	0.03514	0.07504	0.4715	0.03742	0.02787	0.06529	0.2382	0.007439	0.004804	0.01224	0.2504	0.01211	0.004107	0.01621	0.4049	0.05433	0.02066	0.07499	1.7542	0.8516	0.2515	1.1031	8/21/2012	9/14/2012	F	Y	2	WG	2	1061	1063	4.8	7.7	10.2	11.2	13	13.9	15	15	15.5	15.1	15.4	15.4
1534	0.6723	0.1244	0.07576	0.2001	0.5565	0.05892	0.03697	0.09589	0.4807	0.04428	0.03037	0.07465	0.2479	0.007478	0.005499	0.01298	0.2456	0.01408	0.002596	0.01668	0.3827	0.05508	0.01844	0.07352	1.4994	0.751	0.2201	0.971	8/21/2012	9/14/2012	M	Y	2	WG	2	1061	1063	4.8	8.2	11.1	12.3	15.1	17.3	17.7	18.6	18.3	18.9	18.5	19.8
1542	0.6861	0.1429	0.07917	0.222	0.5916	0.05161	0.04503	0.09664	0.5178	0.05017	0.03728	0.08744	0.2825	0.00972	0.00707	0.01679	0.2978	0.0193	0.003651	0.02295	0.6511	0.1107	0.03594	0.1466	1.4619	0.8004	0.2177	1.0181	8/31/2012	9/26/2012	M	Y	2	GW	2	1135	1133	5.1	9	11.6	17.1	21.5	20.1	20.8	21.3	21	21.5	21.4	21.8
1550	0.8917	0.1987	0.1359	0.3346	0.7642	0.0978	0.0667	0.1645	0.6229	0.06752	0.04722	0.1147	0.3235	0.01367	0.007949	0.02162	0.2805	0.01589	0.003721	0.01961	0.6394	0.1112	0.03289	0.1441	1.8737	1.0491	0.2942	1.3433	9/1/2012	9/25/2012	M	Y	2	GW	2	1132	1131	5.7	10.7	13	16.5	20.4	21.7	23.2	24.4	25.5	26.5	27.5	28
1558	0.7849	0.1588	0.09106	0.2499	0.6408	0.07039	0.0503	0.1207	0.5064	0.04587	0.03559	0.08146	0.2579	0.007946	0.006411	0.01436	0.2676	0.01373	0.003399	0.01713	0.4656	0.06895	0.02239	0.09134	1.5154	0.8029	0.231	1.0339	8/29/2012	9/21/2012	M	Y	2	WG	2	1018	1015		7.4	9.4	12.6	15.8	15.7	17.7	17.6	17.9	18.7	17.1	18.8
1565	0.7004	0.1037	0.06851	0.1723	0.5806	0.04119	0.03871	0.0799	0.4864	0.03741	0.02808	0.06549	0.244	0.006894	0.0046	0.01149	0.2311	0.01106	0.002111	0.01317	0.4757	0.07961	0.01614	0.09574	1.51	0.8647	0.2229	1.0876	8/29/2012	9/21/2012	F	Y	2	WG	2	1096	1097		6.9	8.3	9.6	11.1	12.2	12.6	13.6	13.8	14.3	14.1	15
1637	0.7887	0.1652	0.09393	0.2591	0.6637	0.08212	0.04871	0.1308	0.5368	0.05115	0.0339	0.08505	0.2636	0.008757	0.006716	0.01547	0.2639	0.0167	0.002597	0.01929	0.4746	0.08044	0.02003	0.1005	1.5337	0.8177	0.2482	1.0659	9/14/2012	10/10/2012	M	Y	2	WG	2	1061	1063	5.6	9.3	12.3	13.7	17.1	18.2	18.2	19.6	19.7	20.6	20.8	22.7
1661	0.8111	0.1789	0.1045	0.2834	0.7496	0.09973	0.06348	0.1632	0.553	0.0612	0.04239	0.1036	0.2927	0.0118	0.007798	0.0196	0.2853	0.01942	0.0036	0.02302	0.5202	0.08512	0.02859	0.1137	1.4373	0.7811	0.2438	1.0249	9/21/2012	10/13/2012	M	Y	2	WG	2	1018	1015	4.8	8.3	10.5	14.5	18.2	18	19.6	19.4	17.8	21.8	21.4	23.2
1685	0.5604	0.07494	0.04494	0.1199	0.4891	0.03602	0.02987	0.0659	0.4321	0.03168	0.02487	0.05655	0.2063	0.004782	0.00402	0.008801	0.2232	0.01049	0.002177	0.01267	0.4148	0.05802	0.016	0.07402	1.3299	0.6365	0.1879	0.8244	9/25/2012	10/17/2012	F	Y	2	GW	2	1135	1133	5.5	8.4	9.6	11.5	12.2	12.3	13	13.7	14.3	15.2	14	13.8
1638	0.6812	0.1387	0.08537	0.224	0.5704	0.05245	0.04545	0.0979	0.5342	0.05195	0.03608	0.08803	0.2557	0.008559	0.006431	0.01499	0.2664	0.01314	0.003784	0.01693	0.5798	0.09476	0.02567	0.1204	1.471	0.6781	0.2392	0.9172	9/14/2012	10/10/2012	F	Y	2	WG	2	1061	1063	5	8.7	11.3	13.2	16.3	16.9	18.1	18.1	14.5	19	17.7	19.4
1679	0.5403	0.0743	0.05123	0.1255	0.4621	0.03584	0.02741	0.06325	0.4054	0.03138	0.02363	0.05501	0.2091	0.005919	0.004328	0.01025	0.2243	0.009566	0.00248	0.01205	0.4354	0.0683	0.01798	0.08628	1.3767	0.7136	0.2059	0.9195	9/25/2012	10/17/2012	F	Y	2	GW	2	1135	1133	6.1	9.4	11.7	13.5	13.4	13	14	14.9	14.3	14.5	14	15.2
1664	0.8449	0.2273	0.1364	0.3637	0.7143	0.1135	0.07124	0.1847	0.5778	0.07143	0.05655	0.128	0.2792	0.01013	0.006759	0.01689	0.3143	0.01984	0.005445	0.02529	0.5251	0.0964	0.03148	0.1279	1.4353	0.8366	0.2251	1.0616	9/21/2012	10/13/2012	M	Y	2	WG	2	1018	1015	5.2	8.8	11	12.5	16.6	18.4	21.4	22.2	16.3	24.7	25.9	26.7
1672	0.8707	0.1531	0.1131	0.2661	0.6091	0.04489	0.03361	0.0785	0.6214	0.06446	0.03441	0.09887	0.291	0.008762	0.005615	0.01438	0.2641	0.01256	0.002976	0.01553	0.5021	0.06877	0.02212	0.09088	1.4901	0.7852	0.2361	1.0213	9/22/2012	10/18/2012	F	Y	2	GW	2	1132	1131	4.4	8.4	10.9	14.2	16.7	16.4	17	17.9	17.5	17.4	16.4	17.8
1688	0.5742	0.08463	0.0602	0.1448	0.4513	0.02985	0.02318	0.05303	0.4504	0.03723	0.02441	0.06164	0.221	0.005433	0.003989	0.009422	0.2244	0.009761	0.002189	0.01195	0.3794	0.05144	0.01263	0.06408	1.3274	0.6626	0.191	0.8537	9/26/2012	10/17/2012	F	Y	2	WG	2	1062	1059	4.7	7.2	9.6	11.1	12.9	13.6	13.2	14.3	14	14.8	13.6	15.1
1603	0.5944	0.09725	0.05416	0.1514	0.538	0.04773	0.03418	0.08191	0.4429	0.0365	0.02547	0.06197	0.2519	0.007741	0.005586	0.01333	0.2459	0.01186	0.003035	0.0149	0.4577	0.07794	0.02013	0.09807	1.4155	0.7598	0.2176	0.9774	9/8/2012	10/4/2012	F	Y	2	GW	2	1084	1081	5	8.3	11	12.3	13.4	14.3	14.5	14.4	15.3	15.4	15	16
1628	0.5922	0.09109	0.06551	0.1566	0.4661	0.03263	0.02648	0.05911	0.4344	0.03607	0.02359	0.05966	0.2069	0.005463	0.004303	0.009767	0.1939	0.007691	0.001538	0.009229	0.3397	0.0501	0.01488	0.06498	1.4144	0.8157	0.1923	1.008	9/10/2012	10/6/2012	F	Y	2	WG	2	1149	1151	4.1	6.9	9.4	12.1	14.8	14.4	15.4	15.2	15.8	16.4	16.2	17.1
1650	0.5139	0.07082	0.04895	0.1198	0.4251	0.03045	0.02188	0.05233	0.407	0.03036	0.02128	0.05164	0.2326	0.005391	0.005194	0.01058	0.1977	0.0089	0.001496	0.0104	0.3969	0.05748	0.01498	0.07246					9/14/2012	10/8/2012	F	Y	2	GW	2	1082	1080	4.7	8.6	10	11.4	13	13.4	13	13.4	13.4	14.2	13.7	13.9
1682	0.572	0.08374	0.05476	0.1385	0.4734	0.03274	0.02628	0.05902	0.468	0.03605	0.027	0.06305	0.2282	0.006495	0.004635	0.01113	0.2316	0.01002	0.002396	0.01241	0.3663	0.05234	0.01363	0.06597	1.1913	0.5569	0.1732	0.7301	9/25/2012	10/17/2012	F	Y	2	GW	2	1135	1133	5.8	9.1	9.8	11.1	11.6	11.6	12.7	14.5	14	14.3	13.6	13.9
1605	0.5941	0.09698	0.06079	0.1578	0.4731	0.03399	0.03092	0.0649	0.4932	0.04496	0.03028	0.07524	0.249	0.007133	0.006089	0.01322	0.2675	0.01319	0.003128	0.01632	0.3745	0.05407	0.01288	0.06695	1.4405	0.7044	0.2089	0.9133	9/8/2012	10/4/2012	F	Y	2	GW	2	1084	1081	4.4	6.9	8.9	10.7	12.2	13.8	14.4	14.3	14.5	14.3	14.7	15.1
1691	0.5249	0.07717	0.04685	0.124	0.4035	0.02372	0.02084	0.04456	0.4215	0.03434	0.02619	0.06053	0.2339	0.005867	0.005708	0.01157	0.2215	0.01015	0.002048	0.0122	0.4033	0.06078	0.01672	0.0775	1.5552	0.8761	0.2432	1.1193	9/26/2012	10/17/2012	F	Y	2	WG	2	1062	1059	5.2	7.7	10.2	10.4	12.7	13.4	12.9	14.4	14.2	13.8	13.2	14.5
1676	0.7349	0.1658	0.09449	0.2603	0.6186	0.06214	0.04925	0.1114	0.4908	0.0427	0.03076	0.07346	0.275	0.008956	0.006887	0.01584	0.2871	0.01822	0.002799	0.02102	0.4949	0.07803	0.02077	0.0988	1.5081	0.8525	0.2451	1.0976	9/24/2012	10/22/2012	M	Y	2	GW	2	1010	1130	5.1	9.8	13.4	18.7	20	21.6	21.7	23.5	24.3	25	24.7	24.8
1702	0.6792	0.1213	0.07655	0.1978	0.582	0.05427	0.04336	0.09763	0.5062	0.04959	0.03351	0.08309	0.2572	0.007018	0.006059	0.01308	0.2902	0.01478	0.004152	0.01893	0.5322	0.08015	0.02673	0.1069	1.5801	0.822	0.2528	1.0748	10/2/2012	10/30/2012	M	Y	2	WG	2	1016	1013	5.7	9.7	11.4	13.3	16.5	18.1	17.5	18.8	19	19.8	19.5	20.1
1700	0.8587	0.2045	0.1341	0.3386	0.6503	0.08465	0.05161	0.1363	0.6114	0.06968	0.04669	0.1164	0.2795	0.009267	0.0073	0.01657	0.2868	0.02043	0.003632	0.02406	0.5736	0.09598	0.02822	0.1242	1.592	0.9316	0.2659	1.1975	9/29/2012	10/24/2012	M	Y	2	GW	2	1011	1083	6	10.2	13.1	17.9	21.8	23.3	23.7	24.7	26.2	26.5	26.9	26.8
1707	0.645	0.0955	0.05758	0.1531	0.487	0.03382	0.0318	0.06561	0.4568	0.03414	0.02432	0.05846	0.24	0.007034	0.004755	0.01179	0.2112	0.007648	0.001915	0.009563	0.4442	0.0648	0.02144	0.08624	1.4829	0.729	0.2023	0.9314	10/2/2012	10/28/2012	F	Y	2	WG	2	1098	1099	3.2	6.7	8.7	10.3	12.4	13.5	14.8	14.5	14.1	14.7	15.5	15
1715	0.6568	0.1158	0.06572	0.1815	0.493	0.0382	0.02401	0.06221	0.5053	0.0368	0.03295	0.06976	0.2312	0.007649	0.004859	0.01251	0.2215	0.009667	0.00209	0.01176	0.4516	0.07043	0.01735	0.08778	1.3893	0.6435	0.1982	0.8418	10/2/2012	10/30/2012	F	Y	2	WG	2	1145	1150	4.3	8	10	10.4	13.3	13.6	14.1	15.3	16.3	17.3	19.3	19.2
1723	0.6752	0.1234	0.07507	0.1985	0.531	0.03989	0.03823	0.07812	0.5261	0.0487	0.03897	0.08767	0.2376	0.006962	0.005341	0.0123	0.2873	0.01473	0.003697	0.01843	0.4693	0.07418	0.02651	0.1007	1.5934	0.891	0.235	1.126	10/2/2012	10/27/2012	F	Y	2	WG	2	1146	1144	5.1	8.7	10.6	13	16.7	15.4	14.9	17.3	19	17.9	17.6	18.3
1731	0.8601	0.2107	0.1168	0.3275	0.7431	0.09537	0.07848	0.1739	0.6285	0.07627	0.05522	0.1315	0.3056	0.01064	0.008679	0.01932	0.3283	0.02076	0.004639	0.0254	0.5791	0.09654	0.02915	0.1257	1.6462	0.9545	0.2714	1.2259	10/2/2012	10/30/2012	M	Y	2	GW	2	1222	1129	5	8.9	11.7	14.7	19.3	18.2	19.6	20.6	22.1	21.8	22.5	22
1738	0.5977	0.08992	0.06145	0.1514	0.4379	0.03223	0.023	0.05523	0.4769	0.04176	0.03125	0.07301	0.2406	0.006432	0.005789	0.01222	0.2121	0.009668	0.002086	0.01175	0.4358	0.0629	0.0183	0.08119	1.5505	0.7955	0.2465	1.042	10/3/2012	10/30/2012	F	Y	2	GW	2	1223	1130	4.6	7.6	9.2	10.9	13.4	13.5	14.9	15	15.2	15.6	15.4	15.7
1746	0.7139	0.1273	0.07548	0.2028	0.5329	0.04274	0.03589	0.07863	0.5615	0.0547	0.03879	0.09348	0.2776	0.009384	0.005618	0.015	0.2485	0.01133	0.002592	0.01392	0.5361	0.09414	0.03081	0.1249	1.6998	0.9562	0.2803	1.2365	10/3/2012	10/26/2012	F	Y	2	GW	2	1084	1081	5.6	9.2	11.5	13.3	14	13.9	15.3	17.6	16.5	17	17.3	17.3
1754	0.767	0.1584	0.09492	0.2533	0.6337	0.06772	0.05144	0.1192	0.5637	0.05459	0.04543	0.1	0.2894	0.0106	0.008216	0.01882	0.3034	0.01722	0.004014	0.02123	0.4984	0.07615	0.02402	0.1002	1.5458	0.8686	0.259	1.1277	10/5/2012	10/30/2012	M	Y	2	GW	2	1224	1225	5.4	8.6	10.6	11.6	14.9	16.8	18.1	19.3	19.7	20	20	21.6
1762	0.7144	0.144	0.08769	0.2317	0.6546	0.07508	0.05499	0.1301	0.5331	0.04984	0.03607	0.08591	0.2672	0.009787	0.005015	0.0148	0.2644	0.01327	0.003312	0.01659	0.4513	0.07265	0.02623	0.09888	1.3574	0.6833	0.2015	0.8848	10/5/2012	11/2/2012	M	Y	2	WG	2	1149	1151	4.3	7.3	10.1	13.3	16.6	17.1	17.7	17.1	18.8	19.5	19.2	20
1770	0.929	0.1926	0.1329	0.3255	0.6886	0.07373	0.05915	0.1329	0.5876	0.06154	0.04439	0.1059	0.2799	0.008924	0.006643	0.01557	0.2732	0.01515	0.002836	0.01798	0.5822	0.111	0.02997	0.141	1.6754	0.9791	0.2787	1.2578	10/6/2012	11/3/2012	M	Y	2	GW	2	1009	1012	4.7	8.7	11.8	14.8	17	17.6	18	18.5	18.9	21	22.1	23.6
1778	0.6932	0.1204	0.08554	0.2059	0.5838	0.05538	0.0353	0.09068	0.5519	0.05282	0.04059	0.09341	0.2478	0.008278	0.005988	0.01427	0.2456	0.0124	0.002842	0.01524	0.5861	0.09324	0.03564	0.1289	1.4686	0.7416	0.2003	0.9419	10/7/2012	10/31/2012	M	Y	2	GW	2	1082	1080	5.4	9.1	11.2	15.4	16.6	17	16.8	17.5	17.3	17.6	17.8	18.6
1701	0.6836	0.1323	0.07823	0.2105	0.5185	0.04006	0.03406	0.07412	0.5289	0.05444	0.03883	0.09327	0.252	0.007334	0.007141	0.01447	0.2722	0.01508	0.003899	0.01898	0.4818	0.08188	0.03598	0.1179	1.6917	1.0056	0.2378	1.2434	10/2/2012	10/30/2012	F	Y	2	WG	2	1016	1013	5.5	9.3	11.7	13	15.4	16.9	17.6	17.9	18.6	18.4	19	18.4
1708	0.5664	0.09361	0.05431	0.1479	0.4904	0.03601	0.03076	0.06677	0.4478	0.03491	0.02617	0.06109	0.2286	0.007485	0.005651	0.01314	0.2174	0.009392	0.002502	0.01189	0.4272	0.05065	0.01764	0.06829	1.6312	0.872	0.2596	1.1316	10/2/2012	10/28/2012	F	Y	2	WG	2	1098	1099	4.5	7.7	10.1	12.8	13.7	13.1	15.2	15.4	16	15.3	15.8	15.9
1716	0.6044	0.1017	0.06029	0.162	0.5048	0.03694	0.033	0.06994	0.4554	0.03315	0.02707	0.06022	0.2243	0.005804	0.00396	0.009763	0.247	0.01282	0.002289	0.01511	0.436	0.06431	0.01738	0.08168	1.5171	0.7495	0.2305	0.98	10/2/2012	10/30/2012	F	Y	2	WG	2	1145	1150	4.4	8.1	10.5	12.1	13.8	14.1	14.2	14.9	16.6	16.1	16	15.8
1724	0.6155	0.08139	0.05749	0.1389	0.492	0.0328	0.02356	0.05637	0.4461	0.03209	0.019	0.05109	0.1991	0.004545	0.003539	0.008084	0.2048	0.008324	0.001627	0.009951	0.4083	0.05472	0.01634	0.07106	1.5876	0.7401	0.2263	0.9664	10/2/2012	10/27/2012	F	Y	2	WG	2	1146	1144	3.7	6.8	8.4	10.3	12.9	12.4	13.3	13.5	15.3	14	14.3	14.2
1739	0.78	0.1489	0.07747	0.2263	0.6663	0.06855	0.05124	0.1198	0.5369	0.04348	0.03249	0.07596	0.2742	0.009231	0.005907	0.01514	0.3013	0.01477	0.00437	0.01914	0.4872	0.08859	0.02158	0.1102	1.3518	0.6534	0.2068	0.8603	10/3/2012	10/30/2012	M	Y	2	GW	2	1223	1130	3.9	8.1	10.1	11.9	16.1	14.9	16.2	16.8	17.1	19.4	20.7	21.7
1747	0.7119	0.1236	0.08234	0.2059	0.6005	0.06356	0.03902	0.1026	0.5204	0.04541	0.03458	0.07999	0.2777	0.009483	0.006991	0.01647	0.283	0.01689	0.003812	0.0207	0.5552	0.1021	0.02831	0.1304	1.7472	0.9909	0.2641	1.255	10/3/2012	10/26/2012	M	Y	2	GW	2	1084	1081	6.3	10.1	13.7	17.6	20.9	20.4	22	22	22	22.3	22.5	22.8
1763	0.6692	0.1124	0.07054	0.1829	0.5415	0.04444	0.03712	0.08156	0.5243	0.04645	0.03589	0.08234	0.2549	0.00716	0.006257	0.01342	0.2439	0.01283	0.002287	0.01512	0.5179	0.08546	0.02732	0.1128	1.6202	0.8499	0.2296	1.0795	10/5/2012	11/2/2012	M	Y	2	WG	2	1149	1151	4.1	7.1	9.8	11.8	14.2	14.1	17	16	17.1	18.1	18.5	18.6
1771	0.8187	0.177	0.1037	0.2808	0.6392	0.0747	0.05475	0.1295	0.5719	0.05132	0.0457	0.09702	0.2365	0.007552	0.005443	0.013	0.2622	0.01302	0.003186	0.01621	0.5534	0.09194	0.02452	0.1165	1.4499	0.7764	0.2227	0.9991	10/6/2012	11/3/2012	M	Y	2	GW	2	1009	1012	4.5	8.3	11.7	14.6	16.3	16.6	17.3	20.1	20.3	21.3	21.5	22.8
1779	0.6967	0.1202	0.07227	0.1925	0.5259	0.03521	0.03326	0.06846					0.2497	0.00634	0.005209	0.01155	0.2122	0.009337	0.001564	0.0109	0.4696	0.07352	0.01924	0.09276	1.496	0.7335	0.2333	0.9668	10/7/2012	10/31/2012	F	Y	2	GW	2	1082	1080	4.4	8	10.5	13.6	15.5	14.8	14.8	15.9	15.5	15.4	15.1	15.9
1694	0.7754	0.1541	0.104	0.258	0.6875	0.07971	0.05393	0.1336	0.5736	0.06364	0.04246	0.1061	0.2696	0.008636	0.006714	0.01535	0.2793	0.01717	0.002967	0.02014	0.5148	0.1063	0.02569	0.132	1.5313	0.8655	0.2491	1.1146	9/29/2012	10/24/2012	M	Y	2	GW	2	1011	1083	5.7	9.6	11.7	17.1	17.4	18.2	19	20.1	21	21.7	22.2	22.8
1709	0.6963	0.1307	0.07207	0.2028	0.6463	0.06199	0.04863	0.1106	0.5249	0.04638	0.0314	0.07779	0.266	0.007829	0.007294	0.01512	0.266	0.01311	0.003415	0.01652	0.5546	0.08975	0.02783	0.1176	1.5206	0.8143	0.2426	1.0569	10/2/2012	10/28/2012	M	Y	2	WG	2	1098	1099	4.3	7.7	10.5	13.5	15.9	15.9	16.7	17.9	18.8	19.4	19.3	20
1717	0.8714	0.1812	0.1052	0.2864	0.7346	0.08521	0.05235	0.1376	0.5811	0.05557	0.03813	0.0937	0.2729	0.008688	0.006647	0.01534	0.3145	0.02049	0.003737	0.02423	0.5315	0.08089	0.02368	0.1046	1.5311	0.7392	0.2192	0.9584	10/2/2012	10/30/2012	M	Y	2	WG	2	1145	1150	4.6	8.3	11.6	15.1	19.3	20	21	21.6	20.9	21	22.2	23.8
1725	0.6124	0.1107	0.06157	0.1723	0.5056	0.03853	0.03424	0.07277	0.5046	0.04117	0.03295	0.07411	0.2241	0.005912	0.004209	0.01012	0.2307	0.007825	0.003508	0.01133	0.4949	0.0812	0.02289	0.1041	1.6845	1.0071	0.2358	1.2429	10/2/2012	10/27/2012	F	Y	2	WG	2	1146	1144	4.7	8.1	10.4	11.3	14.4	13.5	15.2	15.6	17.3	13.9	14.9	15.6
1740	0.7696	0.1327	0.08218	0.2149	0.5953	0.0502	0.04306	0.09327	0.5647	0.0514	0.0409	0.0923	0.2989	0.009545	0.007628	0.01717	0.281	0.01418	0.003606	0.01778	0.6015	0.08456	0.0285	0.1131	1.7131	1.0391	0.2944	1.3334	10/3/2012	10/30/2012	F	Y	2	GW	2	1223	1130	4.6	8.1	10.5	12	14.5	14.2	16	16.3	17.1	17.7	19	17.5
1748	0.84	0.1633	0.1062	0.2695	0.5792	0.04937	0.03659	0.08596	0.594	0.06083	0.04439	0.1052	0.2824	0.009038	0.007501	0.01654	0.2505	0.01441	0.002145	0.01656	0.5759	0.09531	0.0269	0.1222	2.004	1.1053	0.3197	1.425	10/3/2012	10/26/2012	F	Y	2	GW	2	1084	1081	6.1	10	12.8	14.8	15.4	16.2	17	18.3	19	19.2	19.9	19.3
1756	0.7783	0.1564	0.09394	0.2504	0.63	0.06943	0.0422	0.1116	0.5496	0.05244	0.03713	0.08958	0.2688	0.008759	0.006612	0.01537	0.2583	0.01458	0.00283	0.01741	0.4751	0.07058	0.02442	0.095	1.5409	0.7785	0.2446	1.023	10/5/2012	10/30/2012	M	Y	2	GW	2	1224	1225	5.2	8.4	11.4	12.1	16	16.8	19.3	20	20.4	21.3	20.2	20.6
1764	0.7522	0.166	0.1061	0.2722	0.5957	0.06892	0.04725	0.1162	0.5769	0.06206	0.04632	0.1084	0.2707	0.009874	0.006868	0.01674	0.273	0.01555	0.003618	0.01917	0.5192	0.09396	0.02149	0.1154	1.6457	0.9958	0.2529	1.2487	10/5/2012	11/2/2012	M	Y	2	WG	2	1149	1151	4.2	7.2	9.8	14.3	17.6	18.5	19.3	18.8	20.4	21.2	21	21.3
1772	0.6636	0.1139	0.07329	0.1871	0.5765	0.04543	0.04356	0.08898	0.5252	0.04934	0.03345	0.08279	0.2568	0.007057	0.006584	0.01364	0.2504	0.01537	0.002228	0.0176	0.4988	0.08215	0.0289	0.111	1.8736	1.0055	0.2837	1.2892	10/6/2012	11/3/2012	F	Y	2	GW	2	1009	1012	4.6	8.2	11.1	13.8	15.1	16.1	16.1	17.4	16.9	16.8	16.6	16.6
1780	0.8059	0.1518	0.1004	0.2522	0.6498	0.07115	0.04714	0.1183	0.5582	0.05662	0.03588	0.0925	0.2499	0.006976	0.005595	0.01257	0.2399	0.01271	0.002021	0.01473	0.523	0.08281	0.02452	0.1073	1.4954	0.8246	0.2248	1.0494	10/7/2012	10/31/2012	M	Y	2	GW	2	1082	1080	5.8	9.4	10.8	13.2	15.3	15.7	15.6	16.7	16.6	16.5	16.9	18.4
1710	0.6665	0.1051	0.06206	0.1672	0.4927	0.02788	0.02595	0.05383	0.4805	0.03626	0.02316	0.05943	0.2228	0.004886	0.004371	0.009257	0.2543	0.01202	0.002494	0.01452	0.4175	0.05748	0.01799	0.07547	1.6298	0.8342	0.2384	1.0727	10/2/2012	10/28/2012	F	Y	2	WG	2	1098	1099	3.7	7.1	9.5	11	12.2	13.1	14.1	14.9	15.5	14.9	14.5	14.6
1718	0.6754	0.1202	0.07238	0.1925	0.6484	0.07477	0.0451	0.1199	0.5313	0.05078	0.03952	0.0903	0.261	0.007682	0.006576	0.01426	0.3247	0.02187	0.004349	0.02622	0.5642	0.09178	0.02645	0.1182	1.4188	0.8012	0.2169	1.0181	10/2/2012	10/30/2012	M	Y	2	WG	2	1145	1150	4.7	8.2	10.7	13.3	15.3	15.1	16.6	17.3	17.2	17.7	18.1	20.1
1726	0.6489	0.1096	0.06111	0.1707	0.5193	0.03468	0.03235	0.06703	0.4977	0.04125	0.02883	0.07008	0.2486	0.00679	0.006525	0.01331	0.233	0.009615	0.003046	0.01266	0.5104	0.07292	0.02602	0.09894	1.6828	0.8701	0.2566	1.1266	10/2/2012	10/27/2012	F	Y	2	WG	2	1146	1144	4.3	8	10.3	12.1	14.8	14.2	16.8	16.2	17.1	15.5	15.9	15.5
1733	0.6412	0.09661	0.06923	0.1658	0.505	0.0359	0.03204	0.06794	0.4852	0.03709	0.02762	0.06471	0.2352	0.005953	0.004423	0.01038	0.2321	0.01056	0.001812	0.01238	0.4399	0.06433	0.01995	0.08428	1.5824	0.8124	0.2136	1.026	10/2/2012	10/30/2012	F	Y	2	GW	2	1222	1129	3.6	7.4	10.2	11.5	14.6	14.4	15.5	15	15.5	16.5	16.9	16.1
1741	0.6243	0.09182	0.05291	0.1447	0.5054	0.03216	0.03006	0.06222					0.2416	0.005728	0.004726	0.01045	0.2227	0.009654	0.00189	0.01154					1.6686	0.9064	0.2481	1.1545	10/3/2012	10/30/2012	F	Y	2	GW	2	1223	1130	4.5	7.4	9.3	10.9	12.8	12.2	13.4	15.1	14.9	14.7	15	14.8
1749	0.8665	0.2095	0.119	0.3285	0.5913	0.05078	0.03969	0.09047	0.5643	0.06171	0.03618	0.0979	0.2921	0.01042	0.006118	0.01654	0.2664	0.01114	0.00326	0.0144	0.5469	0.09544	0.0301	0.1255	1.6142	0.8535	0.2626	1.1162	10/3/2012	10/26/2012	F	Y	2	GW	2	1084	1081	5.6	9.6	12.8	14.2	14.4	14.4	16.7	18.6	17.5	17.2	17.7	17.9
1757	0.7044	0.1218	0.07263	0.1945	0.5704	0.04976	0.04256	0.09232	0.4676	0.0392	0.03029	0.06949	0.2415	0.007522	0.005127	0.01265	0.2343	0.009959	0.002861	0.01282	0.4386	0.07488	0.02903	0.1039	1.6903	1.0103	0.2423	1.2526	10/5/2012	11/2/2012	M	Y	2	WG	2	1149	1151	4	6.5	9	12.1	16.7	15.4	17.6	17.1	18.8	19.7	19.9	19.9
1765	0.6939	0.1194	0.08405	0.2035	0.5206	0.04705	0.03412	0.08117	0.5113	0.04769	0.03611	0.0838	0.2071	0.005459	0.004129	0.009588	0.2214	0.01128	0.00208	0.01336	0.4872	0.07242	0.02681	0.09923	1.6489	1.0296	0.249	1.2786	10/5/2012	11/2/2012	M	Y	2	WG	2	1149	1151	3.9	6.8	9.6	13.8	16.4	16.9	18.2	17.7	19.2	20	19.7	20
1773	0.8648	0.1747	0.1272	0.302	0.7396	0.08122	0.07244	0.1537	0.5476	0.05518	0.03574	0.09092	0.2815	0.00902	0.007046	0.01607	0.2776	0.0145	0.003369	0.01787	0.6205	0.1018	0.03676	0.1386	1.6899	1.0662	0.25	1.3162	10/6/2012	11/3/2012	M	Y	2	GW	2	1009	1012	5.1	8.8	12.2	18	21.4	20.9	21.2	19.1	21.9	23.5	24	26.1
1781	0.7227	0.1335	0.09039	0.2239	0.5761	0.04975	0.045	0.09476	0.5297	0.05434	0.04001	0.09435	0.2684	0.007984	0.007316	0.0153	0.2662	0.01526	0.002699	0.01796	0.4551	0.06415	0.02296	0.0871	1.6025	0.9591	0.2611	1.2201	10/7/2012	10/31/2012	F	Y	2	GW	2	1082	1080	5.5	9.1	11.1	12.1	13.5	14.5	15.6	15.1	15.6	15.3	16.3	16.9
1696	0.8587	0.2227	0.1244	0.347	0.7128	0.07841	0.06946	0.1479	0.6246	0.07898	0.05353	0.1325	0.2982	0.01262	0.007851	0.02048	0.2813	0.01555	0.004441	0.01999	0.5935	0.102	0.02907	0.1311	1.5873	1.0127	0.2835	1.2962	9/29/2012	10/24/2012	M	Y	2	GW	2	1011	1083	6.1	10.5	13.3	19.5	19.9	21.6	23	25	25.7	27.1	27.1	27.9
1703	0.5977	0.09818	0.05339	0.1516	0.4734	0.03346	0.02615	0.05962	0.4663	0.0359	0.02633	0.06223	0.2252	0.00563	0.005277	0.01091	0.2071	0.009811	0.001742	0.01155	0.4978	0.07486	0.02198	0.09684	1.4706	0.7655	0.2276	0.9931	10/2/2012	10/30/2012	F	Y	2	WG	2	1016	1013	4.7	9	10.6	11.5	13.1	13.9	14.4	15.6	15.5	15.2	16	15.9
1711	0.5983	0.09324	0.0589	0.1521	0.5195	0.04055	0.03058	0.07113	0.4674	0.03908	0.02812	0.0672	0.2293	0.006219	0.004793	0.01101	0.2336	0.01243	0.002216	0.01465	0.4802	0.06437	0.01828	0.08265	1.539	0.8602	0.2203	1.0804	10/2/2012	10/28/2012	F	Y	2	WG	2	1098	1099	4.6	8.1	11.2	12.3	13.8	14.3	15.8	15.9	15.4	15.6	15.1	15.7
1719	0.6944	0.1245	0.06718	0.1917	0.4862	0.03453	0.02507	0.05961	0.4895	0.03644	0.02863	0.06507	0.2438	0.006337	0.006054	0.01239	0.2417	0.01214	0.002451	0.0146	0.5108	0.07246	0.02452	0.09698	1.5304	0.7578	0.2242	0.982	10/2/2012	10/30/2012	F	Y	2	WG	2	1145	1150	4.7	8.5	12	14.2	17.4	16.3	17.5	18.6	18.7	18.2	18.3	19.6
1727	0.7671	0.146	0.1028	0.2488	0.6089	0.05374	0.04584	0.09958	0.5466	0.06258	0.03959	0.1022	0.2296	0.006519	0.004561	0.01108	0.2386	0.01107	0.002819	0.01389	0.5619	0.09367	0.02574	0.1194	1.6434	0.9187	0.2223	1.1409	10/2/2012	10/30/2012	M	Y	2	GW	2	1222	1129	4.3	7.6	10.6	13.3	17.5	17.5	18.3	18.2	19.3	18.8	18.7	19.8
1734	0.6494	0.1092	0.07115	0.1804	0.5877	0.05749	0.04315	0.1006	0.5532	0.05041	0.03923	0.08964	0.256	0.008537	0.006893	0.01543	0.2832	0.01887	0.003673	0.02254	0.5582	0.09244	0.03065	0.1231	1.7317	0.8949	0.2712	1.1661	10/3/2012	10/30/2012	M	Y	2	GW	2	1223	1130	5.1	8.3	10.1	13.7	18.2	16.2	17.7	18.1	18.8	19.8	19.8	20.6
1742	0.6813	0.1277	0.07115	0.1988	0.5317	0.04532	0.033	0.07832	0.5668	0.05486	0.03817	0.09303	0.2436	0.006911	0.005967	0.01288	0.2297	0.0115	0.002483	0.01398	0.4623	0.07872	0.02257	0.1013	1.7916	0.9803	0.272	1.2522	10/3/2012	10/30/2012	M	Y	2	GW	2	1223	1130	5.1	8.3	9.6	11.3	16.3	16.5	16.9	17.4	18	18.8	19.1	19.7
1750	0.8303	0.1862	0.1078	0.294	0.6534	0.06454	0.05101	0.1155	0.541	0.05262	0.03681	0.08943	0.2526	0.008183	0.004851	0.01303	0.2462	0.0148	0.002047	0.01685	0.5113	0.07292	0.02828	0.1012	1.5976	0.8819	0.2521	1.134	10/5/2012	10/30/2012	M	Y	2	GW	2	1224	1225	5	8.3	11.5	12.5	15.7	17.5	19.2	21.1	21.6	22.5	22.3	22.9
1758	0.5895	0.09084	0.05647	0.1473	0.506	0.03642	0.03201	0.06843	0.513	0.04529	0.03206	0.07735	0.2414	0.006649	0.005394	0.01204	0.2508	0.01174	0.002539	0.01428	0.4718	0.08351	0.02088	0.1044	1.5514	0.8525	0.2356	1.0881	10/5/2012	11/2/2012	F	Y	2	WG	2	1149	1151	4.1	6.7	8.7	11.5	13.3	13.1	14.2	14.4	14.4	15.6	16.4	16.8
1766	0.8745	0.2029	0.1238	0.3267	0.6818	0.07677	0.05858	0.1354	0.6702	0.0802	0.0628	0.143	0.3085	0.009977	0.009169	0.01915	0.3335	0.01953	0.004969	0.02449	0.623	0.1168	0.03643	0.1532	1.5593	1.0234	0.2588	1.2822	10/6/2012	11/3/2012	M	Y	2	GW	2	1009	1012	4.5	8.4	11.8	15.2	18.6	18.4	19.1	20.2	20	20.8	21.2	22.4
1774	0.6467	0.09738	0.0637	0.1611	0.5915	0.04829	0.04317	0.09146	0.5333	0.04445	0.03027	0.07472	0.2566	0.007188	0.005316	0.0125	0.2671	0.01207	0.003868	0.01594	0.5176	0.07024	0.02935	0.09959	1.74	1.0409	0.2507	1.2916	10/7/2012	10/31/2012	F	Y	2	GW	2	1082	1080	5	8.2	10.4	12.9	14.1	14.2	15.2	16.1	16.1	16.5	17.4	17.4
1782	0.69	0.1352	0.06675	0.202	0.549	0.05401	0.03624	0.09025	0.4896	0.03863	0.02949	0.06811	0.2359	0.006403	0.005248	0.01165	0.2856	0.01881	0.002616	0.02143	0.4319	0.0719	0.0195	0.0914	1.3845	0.7529	0.1898	0.9428	10/8/2012	11/3/2012	M	Y	2	WG	2	1147	1148	5.5	8.7	11	12.8	13	14.8	15.4	16	17.4	16.9	18	18.5
1704	0.7554	0.1566	0.0854	0.242	0.6151	0.05167	0.04537	0.09704	0.5577	0.05556	0.03754	0.09309	0.2699	0.007759	0.006639	0.0144	0.2789	0.01539	0.002887	0.01827	0.5645	0.0957	0.03127	0.127	1.5367	0.8847	0.269	1.1536	10/2/2012	10/30/2012	M	Y	2	WG	2	1016	1013	5.6	9.7	12	14	13.5	19.5	20.1	21.8	21.5	22.6	23.9	24
1712	0.8175	0.1796	0.0912	0.2708	0.6311	0.06556	0.04355	0.1091	0.5505	0.04649	0.03637	0.08286	0.2548	0.007991	0.005216	0.01321	0.3039	0.01843	0.004053	0.02248	0.4273	0.06843	0.01886	0.08729	1.5458	0.9217	0.2216	1.1433	10/2/2012	10/28/2012	M	Y	2	WG	2	1098	1099	3.9	6.7	10.2	13.5	16.3	17.6	18.5	19.1	19.8	22.1	21.7	22
1720	0.6312	0.1097	0.07154	0.1812	0.5105	0.03702	0.03334	0.07036	0.4903	0.0478	0.03101	0.07882	0.2217	0.006941	0.00545	0.01239	0.2504	0.01317	0.00356	0.01673	0.5471	0.07913	0.0321	0.1112	1.6003	0.8517	0.2358	1.0874	10/2/2012	10/27/2012	M	Y	2	WG	2	1146	1144	4.2	7.3	10.2	13.7	16.4	15.5	16.5	17.1	18.7	16.9	17.1	17.3
1728	0.611	0.0965	0.06071	0.1572	0.5065	0.04379	0.0367	0.08049	0.5517	0.05123	0.03745	0.08868	0.2375	0.006237	0.005898	0.01213	0.284	0.01524	0.004487	0.01972	0.5614	0.07967	0.02697	0.1066	1.618	0.8929	0.2518	1.1447	10/2/2012	10/30/2012	F	Y	2	GW	2	1222	1129	5.1	9	11.5	12.6	12.1	13.9	15.4	15.6	16.2	15.7	16.6	15.8
1735	0.6709	0.1001	0.07031	0.1705	0.4753	0.03043	0.02682	0.05725	0.4628	0.03939	0.02534	0.06472	0.2204	0.004729	0.003946	0.008675	0.1832	0.005906	0.001322	0.007228	0.4197	0.06592	0.02344	0.08935	1.5408	0.6903	0.2409	0.9312	10/3/2012	10/30/2012	F	Y	2	GW	2	1223	1130	4	7.1	8.5	11.1	13.5	12.1	13.9	13.9	15.2	15.3	15.1	15.2
1743	0.9416	0.2415	0.1269	0.3684	0.8391	0.1125	0.07977	0.1923	0.5995	0.06321	0.04176	0.105	0.3249	0.0134	0.007306	0.02071	0.336	0.02036	0.004626	0.02499	0.576	0.1109	0.0374	0.1483	1.8558	1.0934	0.294	1.3874	10/3/2012	10/26/2012	M	Y	2	GW	2	1084	1081	6	10	12.6	17.7	20.6	20.9	22.5	24.1	24.3	25.4	25.8	26.3
1751	0.7017	0.1326	0.08754	0.2201	0.5363	0.03801	0.03659	0.0746	0.5665	0.05247	0.03749	0.08996	0.2546	0.006825	0.005892	0.01272	0.2684	0.01382	0.003055	0.01687	0.534	0.07867	0.01964	0.0983	1.7016	1.0337	0.2843	1.318	10/5/2012	10/30/2012	F	Y	2	GW	2	1224	1225	5.4	8.9	11.7	11.5	14.3	17.6	16.9	15.7	16.4	17.3	17.7	17.6
1759	0.6832	0.1228	0.0763	0.1991	0.5575	0.05597	0.0388	0.09478	0.5291	0.05541	0.03103	0.08645	0.259	0.007766	0.006317	0.01408	0.2706	0.01567	0.003423	0.01909	0.4674	0.068	0.02623	0.09423	1.699	0.7731	0.2452	1.0183	10/5/2012	11/2/2012	M	Y	2	WG	2	1149	1151	3.7	6.6	9.1	13.2	14.6	14.7	15.9	14.8	16	16.2	16.3	16.5
1767	0.7632	0.1356	0.09624	0.2318	0.6038	0.05303	0.0406	0.09363	0.5656	0.05864	0.04003	0.09866	0.2782	0.008549	0.00572	0.01427	0.283	0.01467	0.003217	0.01789	0.5216	0.08113	0.02653	0.1077	1.6633	1.0839	0.2615	1.3454	10/6/2012	11/3/2012	F	Y	2	GW	2	1009	1012	4.3	8.4	11.2	14.3	17.2	17.5	17.7	18.8	19	19	19	19
1775	0.6522	0.1016	0.06015	0.1617	0.5139	0.0378	0.02783	0.06563	0.4979	0.04051	0.02768	0.06819	0.2323	0.006163	0.004986	0.01115	0.2385	0.01119	0.002233	0.01343	0.4044	0.06227	0.01747	0.07974	1.6169	0.8865	0.2377	1.1243	10/7/2012	10/31/2012	F	Y	2	GW	2	1082	1080	5.1	8.4	10.3	12.4	13.8	14	13.8	14.6	14.1	14.5	15.3	16.4
1783	0.6763	0.1402	0.06193	0.2022	0.5317	0.04838	0.03974	0.08812	0.4698	0.04069	0.02849	0.06917	0.2026	0.004827	0.004167	0.008994	0.2313	0.01196	0.002271	0.01423	0.4589	0.08094	0.01757	0.09851	1.3777	0.7493	0.2196	0.9689	10/8/2012	11/3/2012	M	Y	2	WG	2	1147	1148	5.6	9	12	13.8	15.3	17.8	18.1	15.7	16.6	16.6	18.1	18.5
1705	0.7146	0.1399	0.08533	0.2253	0.6327	0.08248	0.05038	0.1329	0.5557	0.05687	0.04582	0.1027	0.2404	0.008085	0.005814	0.0139	0.3257	0.0211	0.006161	0.02726	0.6027	0.1034	0.03304	0.1364	1.3476	0.6748	0.1952	0.8699	10/2/2012	10/28/2012	M	Y	2	WG	2	1098	1099	4.3	6.9	9	11.1	16.4	17.8	19.5	21	20.6	20.4	19.6	20.5
1713	0.7119	0.1396	0.07279	0.2124	0.5621	0.04586	0.03918	0.08504	0.578	0.05455	0.03876	0.09331	0.2771	0.009947	0.006701	0.01665	0.2535	0.01234	0.002975	0.01532	0.4628	0.06149	0.02158	0.08307	1.5755	0.8201	0.2436	1.0638	10/2/2012	10/30/2012	F	Y	2	WG	2	1145	1150	4.8	8.7	11.8	14.4	17.5	17.1	17.3	17.8	18.1	18.6	18.5	18.4
1721	0.6617	0.1113	0.06889	0.1802	0.5489	0.04525	0.03762	0.08286	0.5658	0.05672	0.03987	0.09658	0.2361	0.006345	0.005782	0.01213	0.2301	0.01144	0.00258	0.01402	0.4687	0.06841	0.02501	0.09341	1.6967	0.906	0.2779	1.1839	10/2/2012	10/27/2012	F	Y	2	WG	2	1146	1144	5.2	8.9	12.2	14.6	13.5	14.5	15.1	15.9	18.4	17.2	16.7	17
1729	0.7384	0.1195	0.08315	0.2027	0.5859	0.04352	0.03606	0.07958	0.5548	0.05311	0.03594	0.08905	0.282	0.008198	0.006064	0.01426	0.2699	0.01407	0.00267	0.01674	0.5938	0.09339	0.02692	0.1203	1.6181	0.8369	0.2419	1.0788	10/2/2012	10/30/2012	F	Y	2	GW	2	1222	1129	4.4	8	10.4	11.8	14	14.3	15.4	15.6	15.6	15.7	17	17.5
1744	0.7298	0.1496	0.09585	0.2455	0.5929	0.05792	0.05399	0.1119	0.5676	0.06401	0.04186	0.1059	0.285	0.009308	0.008122	0.01743	0.2693	0.01706	0.003075	0.02013	0.5839	0.08741	0.02624	0.1137	1.5865	0.895	0.2467	1.1417	10/3/2012	10/26/2012	F	Y	2	GW	2	1084	1081	6.2	9.5	12.3	14.5	16.2	15.3	17.8	17.8	17.3	18.8	18.8	19
1752	0.7076	0.1514	0.09048	0.2419	0.5732	0.05343	0.04411	0.09754	0.5222	0.05767	0.03164	0.08931	0.2553	0.007966	0.006903	0.01487	0.2607	0.01709	0.002941	0.02003	0.4173	0.07238	0.02538	0.09776	1.5189	0.8471	0.2517	1.0988	10/5/2012	10/30/2012	M	Y	2	GW	2	1224	1225	5.3	8.6	10.4	11.4	14.9	16.1	18.3	18.6	18.8	19.8	19.7	20.3
1760	0.7475	0.1371	0.08889	0.226	0.6303	0.06222	0.04571	0.1079	0.5507	0.05409	0.04001	0.09411	0.2668	0.009866	0.005814	0.01568	0.268	0.01355	0.003512	0.01706	0.5237	0.07394	0.02421	0.09815	1.3276	0.7201	0.1991	0.9191	10/5/2012	11/2/2012	M	Y	2	WG	2	1149	1151	3.6	6.1	8.5	12.6	13.9	14.7	15.7	15.6	16.6	17	17.6	17.8
1768	0.6095	0.1025	0.06794	0.1704	0.5377	0.04428	0.03626	0.08053	0.5022	0.04867	0.03558	0.08425	0.2775	0.009587	0.00674	0.01633	0.2909	0.01665	0.003769	0.02042	0.6152	0.09156	0.0258	0.1174	1.5367	0.8001	0.2534	1.0535	10/6/2012	11/3/2012	F	Y	2	GW	2	1009	1012	4.5	8.2	11.1	14.3	15.5	15.3	15.1	15.9	16.5	15.7	15.4	16.1
1776	0.8437	0.176	0.1187	0.2947	0.704	0.06893	0.06463	0.1336	0.6035	0.06729	0.04241	0.1097	0.2718	0.008699	0.007248	0.01595	0.2643	0.01654	0.002542	0.01908	0.5532	0.09325	0.02728	0.1205	1.7711	1.1915	0.3057	1.4972	10/7/2012	10/31/2012	M	Y	2	GW	2	1082	1080	5.8	9.6	12.2	16.3	19.2	20.6	20.8	22.1	22.8	23.5	23.7	25.3
1784	0.6489	0.1108	0.07074	0.1815	0.4889	0.03894	0.03305	0.07199	0.5024	0.04666	0.03292	0.07958	0.2468	0.00699	0.005872	0.01286	0.2268	0.01146	0.001846	0.01331	0.4709	0.07196	0.02312	0.09507	1.4832	0.7243	0.2429	0.9673	10/8/2012	11/3/2012	F	Y	2	WG	2	1147	1148	5.4	8.7	10.9	11.8	13.1	15.4	15.4	15.6	15.8	15.4	16.3	16.3
1706	0.776	0.1542	0.09608	0.2503	0.6397	0.06612	0.05296	0.1191	0.5322	0.04571	0.03951	0.08522	0.2584	0.008795	0.006644	0.01544	0.2742	0.01493	0.002934	0.01786	0.4601	0.07187	0.02704	0.0989	1.5642	0.8853	0.2345	1.1198	10/2/2012	10/28/2012	M	Y	2	WG	2	1098	1099	4.6	7.9	11.5	14.2	16	16.7	17.6	18.4	19	19.7	20.6	21.3
1714	0.7013	0.1208	0.07941	0.2002	0.5525	0.05687	0.03735	0.09423	0.586	0.06438	0.04614	0.1105	0.2487	0.007194	0.006272	0.01347	0.2893	0.01734	0.00376	0.0211	0.4627	0.07531	0.02294	0.09824	1.5887	0.9254	0.263	1.1884	10/2/2012	10/30/2012	M	Y	2	WG	2	1145	1150	4.3	8	10.4	12.1	17	16.9	18.2	18.6	17.9	20.1	19.2	20.8
1722	0.564	0.07817	0.04521	0.1234	0.4859	0.03168	0.02663	0.0583	0.4872	0.04035	0.02787	0.06822	0.2425	0.006305	0.005218	0.01152	0.2438	0.009636	0.00337	0.01301	0.4911	0.06559	0.02082	0.0864	1.6923	0.8334	0.262	1.0954	10/2/2012	10/27/2012	F	Y	2	WG	2	1146	1144	4.6	7.9	10.2	12	13.2	13	14.3	14.2	15.8	14.8	14.1	13.9
1730	0.8923	0.172	0.1072	0.2792	0.68	0.06309	0.05337	0.1165	0.6914	0.07587	0.05278	0.1287	0.311	0.01124	0.00687	0.01811	0.3252	0.01548	0.005851	0.02134	0.6532	0.1044	0.03532	0.1397	1.837	0.9116	0.2803	1.1919	10/2/2012	10/30/2012	F	Y	2	GW	2	1222	1129	4.3	8	10.6	11.8	14.6	14.2	15.4	15.5	16.7	18.6	20	19.8
1737	0.7138	0.1258	0.08318	0.209	0.5563	0.04925	0.04175	0.091	0.5289	0.05019	0.04018	0.09038	0.2669	0.008726	0.006643	0.01537	0.27	0.01378	0.003784	0.01757	0.5544	0.09117	0.02663	0.1178	1.6742	0.9427	0.2707	1.2134	10/3/2012	10/30/2012	F	Y	2	GW	2	1223	1130	5	8.1	10.3	13.3	15.8	15.2	16.9	17.5	17.7	18.8	18.4	17.9
1745	0.6675	0.1129	0.0654	0.1783	0.5223	0.04834	0.03342	0.08176	0.4537	0.03574	0.0247	0.06044	0.2399	0.007122	0.005711	0.01283	0.2527	0.01528	0.002252	0.01753	0.4626	0.07222	0.02172	0.09394	1.5938	0.9053	0.2298	1.1351	10/3/2012	10/26/2012	M	Y	2	GW	2	1084	1081	4.4	7.6	10.1	13.4	17.5	17.9	19.3	19.4	19.5	20.6	20.9	21.4
1753	0.7725	0.1299	0.08916	0.2191	0.5804	0.04713	0.0365	0.08363	0.5606	0.04949	0.03558	0.08508	0.2826	0.00873	0.005584	0.01431	0.2273	0.01278	0.001603	0.01439	0.5698	0.09186	0.02589	0.1178	1.6377	0.9216	0.2314	1.1531	10/5/2012	10/30/2012	M	Y	2	GW	2	1224	1225	4.4	7.7	9.5	9.5	12.6	14	15.8	16.2	17.1	17.8	17.9	18.3
1761	0.7265	0.1308	0.09419	0.225	0.5816	0.05844	0.04768	0.1061	0.5393	0.05349	0.04194	0.09543	0.2506	0.007016	0.006128	0.01314	0.3142	0.01996	0.004552	0.02451	0.47	0.07981	0.02215	0.102	1.5981	0.945	0.2366	1.1815	10/5/2012	11/2/2012	M	Y	2	WG	2	1149	1151	3.6	6.1	8.7	12.7	15.2	15.7	16.3	15.7	16.9	17.7	17.1	17.4
1777	0.6382	0.1006	0.05991	0.1606	0.4749	0.03279	0.02723	0.06002	0.4921	0.04286	0.02471	0.06757	0.2579	0.007009	0.006157	0.01317	0.2552	0.01488	0.002485	0.01736	0.5271	0.09368	0.03286	0.1265	1.3639	0.7152	0.2112	0.9264	10/7/2012	10/31/2012	F	Y	2	GW	2	1082	1080	5.6	9.4	10.9	12.9	13.1	13.8	14.9	15.9	15.5	15	15	15.7
1794	0.576	0.09193	0.05768	0.1496	0.5305	0.05122	0.03793	0.08915	0.4886	0.04398	0.03723	0.08121	0.2424	0.007068	0.005682	0.01275	0.2542	0.01545	0.003004	0.01845	0.4905	0.0779	0.02488	0.1028	1.425	0.8197	0.2037	1.0234	10/8/2012	11/3/2012	M	Y	2	WG	2	1061	1063	4.7	8.2	10	10.4	12.2	13.9	15.5	16	16.5	16.9	17.1	17.9
1793	0.6169	0.09253	0.05928	0.1518	0.5029	0.03637	0.03263	0.069	0.4523	0.03306	0.02453	0.05759	0.2132	0.005321	0.004856	0.01018	0.2553	0.01279	0.002991	0.01578	0.4226	0.05815	0.02	0.07815	1.4345	0.704	0.2338	0.9377	10/8/2012	10/27/2012	F	Y	2	WG	2	1014	1013	4.9	8.3	9.3	10	11.5	11.5	13	13.6	13.9	13.5	14.5	13.8
1801	0.6055	0.09515	0.05125	0.1464	0.5243	0.04485	0.03162	0.07647	0.4622	0.03416	0.02864	0.0628	0.2019	0.004736	0.00371	0.008445	0.2262	0.01088	0.002143	0.01303	0.4047	0.05724	0.01407	0.07131	1.3567	0.7094	0.2038	0.9132	10/8/2012	11/3/2012	F	Y	2	WG	2	1061	1063	4.9	8.1	10.3	12.1	14.5	14.7	15.2	14.6	14.4	14.9	14.8	15.1
1808	0.6053	0.09478	0.05578	0.1506	0.4634	0.03522	0.02415	0.05937	0.487	0.04174	0.02957	0.07131	0.232	0.006714	0.005246	0.01196	0.2558	0.01634	0.002277	0.01862	0.4297	0.06764	0.02253	0.09016	1.5243	0.7744	0.2221	0.9966	10/13/2012	11/10/2012	M	Y	2	WG	2	1018	1015	4.2	7.1	8.7	12.1	14.3	13.8	15.8	16.4	16.7	16.6	17	17.2
1992	0.9424	0.2466	0.1503	0.397	0.7865	0.1065	0.07566	0.1821	0.5813	0.06255	0.04566	0.1082	0.274	0.009154	0.00698	0.01613	0.3025	0.01909	0.00396	0.02305	0.7909	0.1437	0.0421	0.1858	1.4835	0.9381	0.2649	1.203	10/27/2012	11/19/2012	M	Y	2	WG	2	1014	1013	5.8	10.2	12.1	15.7	20.2	20.5	20.9	21.1	21.6	22.3	23.7	24.4
1786	0.6304	0.1039	0.0717	0.1756	0.4922	0.0351	0.03074	0.06585	0.516	0.04838	0.03613	0.08452	0.2377	0.006501	0.006004	0.0125	0.2316	0.009916	0.001987	0.0119	0.4572	0.06664	0.02395	0.09059	1.4448	0.7529	0.2399	0.9928	10/8/2012	11/3/2012	F	Y	2	WG	2	1147	1148	5	8	10.3	11.3	14.3	15.4	16.1	15.4	15.5	15.8	16.8	16.9
1785	0.6464	0.09362	0.07334	0.167	0.508	0.03613	0.03349	0.06962	0.5307	0.05397	0.03214	0.08611	0.2259	0.006252	0.005171	0.01142	0.2518	0.01227	0.003151	0.01542	0.4922	0.07324	0.02225	0.09549	1.6116	0.9104	0.2273	1.1377	10/8/2012	11/3/2012	F	Y	2	WG	2	1147	1148	4.8	8.1	10.9	12.4	13.9	14.2	15	14.5	15.1	15	16.8	16.7
1802	0.6622	0.1205	0.07474	0.1953	0.5651	0.05084	0.03268	0.08352	0.5418	0.05426	0.03598	0.09024	0.2484	0.00729	0.005316	0.01261	0.2203	0.01076	0.001559	0.01232	0.4793	0.08134	0.01656	0.0979	1.5839	0.8523	0.2509	1.1032	10/9/2012	11/6/2012	F	Y	6	WG	2	652	624	4.6	9.4	12.5	13	13.8	14.9	14.6	15.2	14.9	15.5	14.6	15.5
1809	0.6791	0.1171	0.07387	0.1909	0.5704	0.0545	0.04097	0.09547	0.5368	0.05787	0.04043	0.0983	0.2696	0.009219	0.007386	0.0166	0.2795	0.01582	0.003938	0.01976	0.5671	0.08874	0.02968	0.1184	1.4618	0.8739	0.239	1.1129	10/13/2012	11/10/2012	M	Y	2	WG	2	1018	1015	4.7	7.5	10.3	14	15.7	14.3	16.6	16.1	17.2	18.1	18.2	18.2
1848	0.8115	0.1628	0.1071	0.27	0.6845	0.07284	0.05327	0.1261	0.5068	0.04571	0.03201	0.07773	0.2624	0.008821	0.004491	0.01331	0.2455	0.01459	0.001836	0.01642	0.413	0.07365	0.01882	0.09247	1.5284	0.8919	0.231	1.1229	10/23/2012	11/17/2012	M	Y	2	GW	2	1011	1012	4.7	7.8	12.1	14.8	18.2	19.3	20	21	21.6	23.9	24.4	26.5
1787	0.6692	0.1148	0.06945	0.1843	0.5643	0.04986	0.03706	0.08692	0.4708	0.03563	0.02475	0.06037	0.2273	0.006182	0.003435	0.009616	0.2182	0.01058	0.001521	0.0121	0.4951	0.07898	0.02576	0.1047	1.3448	0.5833	0.189	0.7722	10/8/2012	11/3/2012	M	Y	2	WG	2	1147	1148	4.1	7	8.8	10.1	11.9	14.6	14.8	14.5	15.4	15.4	16.7	16.4
1795	0.7587	0.145	0.07849	0.2235	0.7125	0.08623	0.05807	0.1443	0.4946	0.04296	0.03203	0.07498	0.2256	0.005664	0.005531	0.01119	0.2696	0.0159	0.003271	0.01917	0.4718	0.07543	0.02515	0.1006	1.5996	1.114	0.25	1.3639	10/8/2012	11/3/2012	M	Y	2	WG	2	1061	1063	4.5	8	10.9	14.1	17.5	18.4	19.1	19.4	20.1	20.1	20.7	21.7
1803	0.705	0.1292	0.07945	0.2086	0.6231	0.07201	0.04014	0.1122	0.576	0.06694	0.04195	0.1089	0.2756	0.009121	0.005944	0.01506	0.271	0.01813	0.002516	0.02065	0.5422	0.09397	0.02992	0.1239	1.7377	0.958	0.2819	1.2398	10/9/2012	11/6/2012	M	Y	6	WG	2	652	624	4.9	10.4	13.7	15.7	19	20.8	21.8	22.4	23.1	23.4	23.5	23.9
1810	0.72	0.1368	0.08263	0.2194	0.6905	0.08191	0.05272	0.1346	0.6024	0.07143	0.0439	0.1153	0.2698	0.008483	0.006536	0.01502	0.2886	0.01808	0.003499	0.02158	0.5765	0.08947	0.03247	0.1219	1.4539	0.6352	0.2066	0.8418	10/13/2012	11/10/2012	M	Y	2	WG	2	1018	1015	4.1	6.9	8.3	10.6	13.7	15.4	15.4	17	17.4	17.4	17.8	17.7
1817	0.6355	0.1115	0.07338	0.1849	0.5118	0.03923	0.03526	0.07449	0.5306	0.05241	0.03808	0.09049	0.257	0.007869	0.00643	0.0143	0.2616	0.01269	0.003214	0.01591	0.4811	0.06698	0.02296	0.08994	1.6918	0.963	0.2677	1.2307	10/15/2012	11/12/2012	F	Y	2	WG	2	1096	1097	4.7	8.5	10.5	11.3	13.4	15.6	15.2	15.3	15.2	16.8	15.9	15.7
1833	0.6056	0.1065	0.0641	0.1706	0.4548	0.03303	0.02889	0.06192	0.4598	0.04161	0.02872	0.07032	0.2298	0.005704	0.005057	0.01076	0.2468	0.0126	0.002837	0.01544	0.3883	0.065	0.01624	0.08124	1.4196	0.6502	0.2237	0.8739	10/17/2012	11/10/2012	F	Y	2	WG	2	1062	1059	4.5	7.8	10.2	10.9	12.8	14.3	14.8	15.2	14.5	15.2	14.4	15.1
1994	0.7292	0.1458	0.0887	0.2345	0.6214	0.06705	0.04711	0.1142	0.5493	0.05061	0.03649	0.08709	0.2534	0.009208	0.004837	0.01405	0.2623	0.01531	0.003002	0.01831	0.6516	0.1131	0.02904	0.1421	1.4096	0.832	0.2114	1.0434	10/27/2012	11/19/2012	M	Y	2	WG	2	1014	1013	5.7	10.3	12.3	14.5	17.8	17.5	18.7	19.9	20.9	22.6	23.4	24.3
1788	0.7761	0.1619	0.08903	0.2509	0.6065	0.04958	0.04168	0.09126	0.5841	0.05967	0.04144	0.1011	0.2512	0.009302	0.004543	0.01385	0.3027	0.01434	0.005101	0.01944	0.5718	0.07867	0.03219	0.1109	1.5904	0.794	0.2274	1.0214	10/8/2012	10/27/2012	F	Y	2	WG	2	1014	1013	6.3	10.1	11.4	12.2	15.2	16	17	16.4	17	17.2	18.4	18
1796	0.6064	0.09285	0.06293	0.1558	0.5146	0.04692	0.02683	0.07375	0.4807	0.03753	0.02814	0.06567	0.2153	0.005372	0.004653	0.01003	0.2343	0.01255	0.002578	0.01513	0.4901	0.07519	0.02784	0.103	1.5629	0.7952	0.2244	1.0197	10/8/2012	11/3/2012	M	Y	2	WG	2	1061	1063	4.9	8.3	10.7	12.1	13.1	14.9	15.6	16.3	16.2	16.2	16.9	17.7
1804	0.7118	0.1196	0.08228	0.2018	0.6076	0.05083	0.04559	0.09642	0.5349	0.04775	0.03023	0.07798	0.2617	0.007738	0.006241	0.01398	0.2395	0.01714	0.00157	0.01871	0.5643	0.09561	0.02741	0.123	1.7146	0.8919	0.2916	1.1835	10/9/2012	11/6/2012	M	Y	6	WG	2	652	624	4.6	9.8	12.4	14.8	15.1	16.3	16.9	17.9	18.3	19.2	21.9	20.7
1811	0.6769	0.124	0.07569	0.1997	0.6177	0.0721	0.04266	0.1148	0.469	0.03939	0.03105	0.07044	0.2429	0.006941	0.005505	0.01245	0.2619	0.01695	0.002425	0.01937	0.5656	0.08794	0.02982	0.1178	1.5387	0.8967	0.244	1.1407	10/13/2012	11/10/2012	M	Y	2	WG	2	1018	1015	4.9	8	10	12.3	15.5	17.4	17.5	19.1	20.1	21.1	21	21.7
1818	0.6421	0.1054	0.07136	0.1768	0.5354	0.04972	0.04077	0.09049	0.5216	0.04651	0.03718	0.08369	0.225	0.005967	0.005626	0.01159	0.2731	0.01436	0.003915	0.01827	0.4709	0.06921	0.0211	0.0903					10/15/2012	11/12/2012	F	Y	2	WG	2	1096	1097	4.7	8.7	10.3	11.9	15.8	17.1	17.3	17	16.8	17.3	17.6	17.6
1995	0.8472	0.2015	0.1205	0.322	0.6578	0.07319	0.05697	0.1302	0.5987	0.06723	0.04689	0.1141	0.2434	0.008256	0.005351	0.01361	0.2673	0.01492	0.004155	0.01907	0.6397	0.11	0.03678	0.1468	1.473	0.9479	0.2585	1.2064	10/27/2012	11/19/2012	M	Y	2	WG	2	1014	1013	6.1	10.6	13	16.7	19.2	19.3	21.1	21.1	21.6	22.6	24.4	25.4
1789	0.7377	0.1512	0.09579	0.247	0.5549	0.05383	0.05067	0.1045	0.5688	0.06398	0.04288	0.1069	0.2668	0.009014	0.006326	0.01534	0.2829	0.01892	0.003438	0.02236	0.5314	0.08328	0.02931	0.1126	1.7886	1.0835	0.3133	1.3968	10/8/2012	10/27/2012	F	Y	2	WG	2	1014	1013	6.4	9.8	11.5	12.8	15.1	15.9	17.5	16.9	17.3	15	18.9	17.9
1797	0.6133	0.1057	0.06201	0.1677	0.4717	0.03391	0.03049	0.0644	0.4613	0.03473	0.03046	0.0652	0.2165	0.007197	0.004912	0.01211	0.2288	0.01128	0.002374	0.01366	0.5677	0.07548	0.02835	0.1038	1.5325	0.8764	0.2317	1.1081	10/8/2012	11/3/2012	F	Y	2	WG	2	1061	1063	5.1	8.5	11.6	13.5	14.6	16.1	17	17.6	17.2	18	18.9	18.6
1812	0.5698	0.089	0.04975	0.1387	0.4476	0.02877	0.02592	0.05469	0.4115	0.02839	0.02238	0.05077	0.1881	0.004457	0.003672	0.008129	0.2186	0.009683	0.002486	0.01217	0.4074	0.05159	0.01879	0.07038	1.5637	0.8315	0.2176	1.0491	10/13/2012	11/10/2012	F	Y	2	WG	2	1018	1015	4.3	7.1	8.8	11.4	13.5	14.4	15.7	15.9	15.7	16.7	16.3	16.8
1819	0.574	0.1001	0.05702	0.1571	0.4993	0.04508	0.02871	0.07379	0.4947	0.04148	0.03133	0.07281	0.2258	0.006574	0.004839	0.01141	0.2598	0.0157	0.002657	0.01836	0.5154	0.07177	0.02454	0.09631	1.5021	0.8098	0.2243	1.0341	10/15/2012	11/12/2012	F	Y	2	WG	2	1096	1097	5.1	8.9	11	12.4	14.1	15.5	15.2	15.2	15.4	17.2	16.4	16.6
1851	0.9218	0.2572	0.1354	0.3926	0.8083	0.1131	0.08569	0.1987	0.6182	0.07169	0.05107	0.1228	0.297	0.0118	0.006931	0.01873	0.2839	0.01826	0.003293	0.02156	0.522	0.08329	0.02842	0.1117	1.4354	0.9019	0.2468	1.1487	10/23/2012	11/17/2012	M	Y	2	GW	2	1011	1012	5.8	9.8	12.4	14.7	19.1	20	21.3	22.2	22.5	23.5	24.6	26.5
1996	0.5173	0.07541	0.04467	0.1201	0.4334	0.03341	0.02526	0.05868	0.3922	0.02932	0.02147	0.05078	0.1986	0.00483	0.00451	0.00934	0.195	0.008667	0.001801	0.01047	0.3851	0.05332	0.02008	0.0734	1.4514	0.697	0.224	0.921	10/27/2012	11/24/2012	M	Y	2	WG	2	1146	1144	4.2	7.2	8.6	10.2	13.8	12.6	12.8	14.1	14.4	14.2	14.2	15.2
1790	0.6693	0.1193	0.07022	0.1895	0.471	0.02993	0.02621	0.05614	0.5024	0.04482	0.03044	0.07525	0.2311	0.005843	0.004456	0.0103	0.2371	0.01159	0.001876	0.01347	0.4192	0.05767	0.02009	0.07775	1.5526	0.7894	0.2486	1.038	10/8/2012	10/27/2012	F	Y	2	WG	2	1014	1013	6.2	9.5	10.8	11.7	15.2	13.8	15.5	15	15.2	15	16.5	15.8
1798	0.783	0.1678	0.08923	0.257	0.7051	0.0957	0.05375	0.1495	0.5308	0.05445	0.03215	0.0866	0.3857	0.02118		0.034245	0.3868	0.02211		0.03804	0.4836	0.0833	0.02363	0.1069	1.6744	1.0271	0.2557	1.2829	10/8/2012	11/3/2012	M	Y	2	WG	2	1061	1063	5.3	9	11.2	11.6	14.6	17.5	18.3	19.6	20.1	20.4	22.1	22.2
1813	0.5793	0.08953	0.05959	0.1491	0.4679	0.03309	0.02678	0.05987	0.4702	0.0412	0.03019	0.07138	0.2175	0.005122	0.004593	0.009715	0.2327	0.01037	0.002422	0.01279	0.4267	0.05992	0.03053	0.09046	1.6062	0.8239	0.2347	1.0586	10/13/2012	11/10/2012	F	Y	2	WG	2	1018	1015	4.7	7.6	9.8	11.9	14.4	14.3	14.7	14.8	15.1	16	15.6	16.2
1820	0.9624	0.2456	0.145	0.3907	0.8162	0.1084	0.08571	0.1899	0.7127	0.089975	0.067215	0.1572	0.3236	0.01266	0.0084	0.02106	0.3731	0.02415	0.00742	0.03157	0.6309	0.1128	0.04511	0.158	1.8618	1.0217	0.3157	1.3373	10/16/2012	11/13/2012	F	Y	6	WG	2	669	739	6.8	12	13	10.6	18.9	18.5	19	20.4	22.6	23.7	24.3	23.9
1989	0.8547	0.1922	0.142	0.3342	0.6709	0.0833	0.05703	0.1403	0.6121	0.07257	0.03997	0.1125	0.2692	0.01004	0.006981	0.01702	0.2748	0.01739	0.004681	0.02207	0.62	0.1101	0.03177	0.1419	1.606	0.96	0.2867	1.2467	10/27/2012	11/19/2012	M	Y	2	WG	2	1014	1013	6.5	11	13.7	16.5	18.9	19.6	21.3		22.1	23.2	24.7	25.5
1791	0.6546	0.121	0.07234	0.1933	0.5664	0.05041	0.0434	0.09381	0.5452	0.05607	0.03336	0.08943	0.2479	0.008046	0.005511	0.01356	0.2522	0.01513	0.003427	0.01856	0.5056	0.07011	0.02986	0.09997	1.5858	0.8224	0.2522	1.0746	10/8/2012	10/27/2012	M	Y	2	WG	2	1014	1013	6.5	9.6	10.7	11.6	16.3	18.1	17.6	16.8	17.6	18.3	18.4	18.5
1799	0.6427	0.1248	0.07387	0.1987	0.4879	0.03902	0.0343	0.07332	0.5367	0.05164	0.03587	0.08751	0.2489	0.008439	0.004855	0.01329	0.2494	0.01143	0.003091	0.01453	0.5163	0.07837	0.01995	0.09832	1.6797	0.9268	0.2493	1.1761	10/8/2012	11/3/2012	F	Y	2	WG	2	1061	1063	4.9	8.4	10.9	12.4	14.1	14.6	15.8	14.9	15.2	16.1	15.7	16.1
1806	0.649	0.1073	0.06354	0.1708	0.5171	0.04384	0.03464	0.07848	0.505	0.04642	0.03431	0.08073	0.2418	0.006184	0.005882	0.01207	0.292	0.01827	0.003397	0.02167	0.4781	0.07696	0.02314	0.1001	1.4317	0.7598	0.2147	0.9745	10/13/2012	11/10/2012	M	Y	2	WG	2	1018	1015	4.1	6.9	8.9	11.8	13.8	13.7	15.9	17	18	18.9	18.9	19.8
1829	0.6081	0.09781	0.07042	0.1682	0.4915	0.03581	0.03034	0.06616	0.4464	0.03925	0.02753	0.06678	0.2177	0.006177	0.004286	0.01046	0.2379	0.01188	0.00283	0.01471	0.4362	0.07448	0.01992	0.09439	1.2589	0.6811	0.1763	0.8575	10/16/2012	11/7/2012	F	Y	2	GW	2	1135	1133	4.6	8.3	9.5	10.8	12.9	13.3	13.2	13.6	14.4	14.7	15	14.7
1792	0.6039	0.1053	0.06027	0.1655	0.5313	0.04436	0.03828	0.08264	0.4657	0.03586	0.02666	0.06252	0.227	0.005749	0.005029	0.01078	0.2378	0.01073	0.002899	0.01363	0.4273	0.06408	0.01931	0.08339	1.4473	0.8373	0.2259	1.0632	10/8/2012	10/27/2012	F	Y	2	WG	2	1014	1013	6.1	9.6	11.3	11.6	12.4	13	15.3	15.5	15.6	15.6	16.1	16.1
1800	0.5585	0.08064	0.04629	0.1269	0.4664	0.03439	0.02567	0.06006	0.5121	0.0478	0.03288	0.08067	0.2362	0.006838	0.005323	0.01216	0.2332	0.01318	0.002281	0.01546	0.4785	0.06727	0.02494	0.09221	1.4208	0.7436	0.2196	0.9632	10/8/2012	11/3/2012	F	Y	2	WG	2	1061	1063	4.7	8.4	10.1	11.1	12.9	14.3	15.1	15.3	15.5	16.2	15.8	16.3
1807	0.597	0.08824	0.04918	0.1374	0.4979	0.03279	0.02698	0.05977	0.4778	0.03595	0.02789	0.06385	0.2067	0.005168	0.004068	0.009236	0.2609	0.01115	0.00391	0.01506	0.4862	0.06642	0.02502	0.09144	1.4441	0.6639	0.2178	0.8817	10/13/2012	11/10/2012	F	Y	2	WG	2	1018	1015	4	6.7	8.8	11	12.1	11.1	11.4	11.4	11.6	12.4	13.1	13.6
1838	0.5392	0.08144	0.04954	0.131	0.4444	0.02961	0.02122	0.05084	0.3878	0.02648	0.01912	0.0456	0.2071	0.004984	0.004153	0.009137	0.1929	0.01008	0.001276	0.01135	0.348	0.05085	0.01273	0.06358	1.3242	0.6398	0.1878	0.8275	10/17/2012	11/10/2012	F	Y	2	WG	2	1062	1059	3.8	6.7	8.8	9.6	12.3	13.4	12.8	14.3	13.8	13.2	13.2	14.7
1991	0.7556	0.1527	0.09933	0.252	0.5008	0.03973	0.02805	0.06778	0.541	0.0556	0.03272	0.08832	0.2253	0.005928	0.004809	0.01074	0.2633	0.01447	0.003071	0.01754	0.5629	0.09661	0.03819	0.1348	1.7676	0.9929	0.2658	1.2587	10/27/2012	11/19/2012	F	Y	2	WG	2	1014	1013	5.5	10	11.6	13.2	16.7	17.6	19.2	18.8	19.4	19.5	19.9	20
1888	0.5748	0.08371	0.05795	0.1417	0.4313	0.03267	0.02415	0.05682	0.4461	0.03536	0.02495	0.06031	0.2254	0.005565	0.004129	0.009694	0.2346	0.01104	0.002536	0.01357	0.405	0.0553	0.01614	0.07144	1.4267	0.699	0.2171	0.9161	10/29/2012	11/23/2012	F	Y	2	WG	2	1017	1015	5.6	8.2	9.1	10.3	10.7	11.5	12.3	12.7	13.2	14.3	14.9	15.5
1896	0.7658	0.1648	0.102	0.2668	0.584	0.05852	0.04417	0.1027	0.4986	0.04958	0.03458	0.08416	0.2764	0.00857	0.007522	0.01609	0.242	0.01368	0.001861	0.01554	0.4941	0.08126	0.01898	0.1002	1.4377	0.8334	0.2214	1.0548	10/29/2012	11/24/2012	M	Y	2	GW	2	1224	1225	5.3	8.5	10.9	13.7	18	18.5	18.9	19.8	22	22.5	23.5	24.5
1973	0.7032	0.1291	0.06601	0.1951	0.5818	0.05719	0.03665	0.09384	0.5031	0.04195	0.03054	0.07248	0.2401	0.006777	0.005442	0.01222	0.2819	0.01579	0.003004	0.0188	0.4379	0.07324	0.01995	0.09319	1.6902	0.9153	0.2427	1.158	10/29/2012	11/26/2012	M	Y	2	WG	2	1145	1150	5.6	9.4	12.4	17.6	19.7	18.6	19.1	19.3	20.2	20.2	20.6	21
1974	0.8121	0.1803	0.1099	0.2903	0.7071	0.09063	0.06221	0.1528	0.5441	0.05063	0.04048	0.09111	0.2956	0.01044	0.007516	0.01795	0.2935	0.01672	0.003448	0.02017	0.524	0.09051	0.02991	0.1204	1.6392	0.9283	0.2415	1.1699	10/29/2012	11/26/2012	M	Y	2	WG	2	1145	1150	5.4	8.8	11	15.3	19.5	20.1	19.7	22	22.6	23.3	20.7	26
1945	0.529	0.0809	0.05381	0.1347	0.4538	0.02906	0.0272	0.05626	0.422	0.033	0.02342	0.05642	0.1986	0.005179	0.003688	0.008867	0.2087	0.008704	0.002521	0.01122	0.3383	0.04189	0.01271	0.0546	1.5407	0.8425	0.2394	1.0818	11/8/2012	12/6/2012	F	Y	2	WG	2	1096	1097	5.2	8.7	10	11	11.3		12.9	13.6	14	14.3	14	14.5
1975	0.8624	0.164	0.1081	0.2722	0.7341	0.08809	0.06254	0.1506	0.5345	0.05607	0.03709	0.09315	0.2877	0.01091	0.00732	0.01823	0.3341	0.02135	0.005697	0.02704	0.5662	0.09306	0.03437	0.1274	1.6352	1	0.2371	1.2371	10/29/2012	11/26/2012	M	Y	2	WG	2	1145	1150	5.2	8.9	11.2	15.1	19.6	18	19.1	19.4	19.8	20.8	21.2	22.2
1899	0.5511	0.0883	0.04389	0.1322	0.4744	0.03382	0.0266	0.06042	0.4422	0.03707	0.02204	0.05911	0.2466	0.007122	0.005454	0.01258	0.2249	0.01055	0.002379	0.01292	0.371	0.05496	0.01454	0.06951	1.3137	0.6204	0.197	0.8174	10/29/2012	11/24/2012	F	Y	2	GW	2	1224	1225	5.4	8.6	11.4	14	14.6	13.7	15.1	14.9	15.8	14.9	14.9	15.4
1922	0.6318	0.1097	0.07237	0.182	0.4491	0.03515	0.02427	0.05942	0.4085	0.03251	0.02432	0.05683	0.2054	0.00575	0.004382	0.01013	0.201	0.01059	0.001735	0.01233	0.4268	0.05959	0.02283	0.08242	1.3803	0.6927	0.2087	0.9014	11/2/2012	11/27/2012	F	Y	2	WG	2	1147	1148	4.4	7.4	8.7	9.7	11.3	11.5	12	12.6	12.9	13	13.6	13.9
1900	0.5837	0.09083	0.05983	0.1507	0.5025	0.04587	0.03143	0.07731	0.4461	0.04143	0.02935	0.07078	0.2338	0.006504	0.00531	0.01181	0.2303	0.01049	0.002623	0.01311	0.3851	0.07162	0.01778	0.08939	1.3101	0.6341	0.1847	0.8188	10/30/2012	11/27/2012	F	Y	2	GW	2	1082	1080	4.9	7.1	10.3	13.6	13.1	14.7	15	15.3	15.5	16.2	16.6	16.1
1933	0.7954	0.1775	0.0981	0.2756	0.6206	0.05426	0.04849	0.1027	0.5793	0.06419	0.04369	0.1079	0.3041	0.01137	0.00661	0.01798	0.2975	0.01294	0.005492	0.01843	0.6291	0.1035	0.03138	0.1348	1.4907	0.8281	0.2257	1.0538	11/8/2012	12/6/2012	F	Y	2	GW	2	1132	1131	5.3	8.9	11.8	15.6	17.3	17.6	19.8	21	22.1	23.8	24.7	24.9
1941	0.8769	0.226	0.1125	0.3385	0.7575	0.1057	0.06823	0.174	0.5568	0.05391	0.03895	0.09286	0.2873	0.01098	0.007533	0.01852	0.3579	0.0237	0.006346	0.03005	0.6508	0.106	0.03295	0.1389	1.464	0.8292	0.2371	1.0663	11/8/2012	12/6/2012	M	Y	2	WG	2	1096	1097	5.8	9.4	12	15	19.8		22.5	23.4	24.6	25.8	25.1	26.4
1971	0.7447	0.1228	0.08945	0.2122	0.568	0.04705	0.03594	0.08299	0.5052	0.04201	0.02978	0.07179	0.2435	0.007604	0.004331	0.01193	0.2278	0.009338	0.002093	0.01143	0.432	0.07249	0.01556	0.08804	1.6747	0.8621	0.2331	1.0952	10/29/2012	11/26/2012	M	Y	2	WG	2	1145	1150	4.3	8.1	9.6	13.2	16.8	16.5	17.1	17.7	17.7	18.5	19.5	20.3
1895	0.5936	0.09932	0.06682	0.1661	0.4307	0.02694	0.02363	0.05057	0.4827	0.04418	0.03289	0.07707	0.2464	0.007066	0.005781	0.01285	0.2194	0.01136	0.001765	0.01312	0.4382	0.06486	0.02008	0.08495	1.2767	0.7724	0.2007	0.9731	10/29/2012	11/24/2012	F	Y	2	GW	2	1224	1225	5.5	9	10.3	10.6	13.1	12.9	14.5	14	15.3	15.2	15.9	16.3
2008	0.5658	0.0782	0.05706	0.1353																					1.4963	0.7416	0.2159	0.9575	11/23/2012	12/21/2012	F	Y	2	WG	2	1017	1015	6.3	10.2	10.9	12.2	13.1	13.8	15.1	15.2	15	15.3	15.9	15.3
2031	0.597	0.08828	0.05993	0.1482	0.4613	0.0305	0.02511	0.05561	0.4804	0.04151	0.02704	0.06855	0.2598	0.007214	0.006458	0.01367	0.2359	0.009583	0.002633	0.01222	0.4295	0.05641	0.02009	0.0765	1.6549	0.9365	0.2459	1.1823	11/23/2012	12/21/2012	F	Y	2	WG	2	1146	1144	5.1	7.8	9.5	9.9	10.3	11.9	12.1	13.3	15.4	15.6	14.2	14.6
2047	0.6386	0.1329	0.07921	0.2121	0.5569	0.06036	0.04242	0.1028	0.5663	0.0559	0.04082	0.09672	0.2639	0.009495	0.006251	0.01575	0.2834	0.01602	0.003134	0.01916	0.496	0.08176	0.02531	0.1071	1.4773	0.859	0.2375	1.0966	11/26/2012	12/24/2012	M	Y	2	WG	2	1061	1063		11	13.3	17.3	19.9	21.6	22.6	23.1	23.3	24.1	23.7	24.7
2071	0.5547	0.07955	0.05749	0.137	0.4633	0.03587	0.0277	0.06357					0.2269	0.006123	0.005259	0.01138	0.2515	0.01226	0.003656	0.01592					1.4953	0.7312	0.2131	0.9444	12/5/2012	1/1/2013	F	Y	2	WG	2	1096	1097	4.8	7.5	8.1	8.3	9.9	10.6	9.2	11.5	12.4	13.5	12.9	12.9
2048	0.5519	0.07178	0.04804	0.1198	0.45	0.02417	0.02269	0.04686	0.4137	0.02476	0.01852	0.04328	0.2245	0.005122	0.00452	0.009642	0.2227	0.009914	0.002117	0.01203	0.4802	0.06294	0.0161	0.07904	1.3849	0.6845	0.2069	0.8914	11/27/2012	12/24/2012	F	Y	2	WG	2	1147	1148	4.6	7.8	9.3	10.4	11.7	12.3	13.5	13.3	14	13.9	14.3	14.2
2080	0.7357	0.1578	0.0989	0.2567	0.6122	0.0713	0.05476	0.1261	0.579	0.06971	0.04829	0.118	0.2572	0.009127	0.006423	0.01555	0.2991	0.01897	0.004671	0.02364	0.5295	0.09098	0.03265	0.1236	1.5655	0.8548	0.2396	1.0944	12/10/2012	1/7/2013	M	Y	2	WG	2	1014	1013	6.8	10.3	12.6	16	19	19.9	20.7	22.2	20.9	23.1	24	24.2
2065	0.7707	0.1451	0.09843	0.2435	0.5723	0.05457	0.04127	0.09584	0.5478	0.05242	0.04325	0.09567	0.2827	0.00903	0.007787	0.01682	0.2818	0.01589	0.003258	0.01914	0.5284	0.08787	0.02559	0.1135	1.5549	0.8193	0.2225	1.0418	12/4/2012	1/1/2013	M	Y	2	WG	2	1062	1059	5.7	9.2	11.4	13.2	15.4	17.7	20.3	21.6	22.5	23.7	22.4	23.4
2034	0.6391	0.1096	0.06759	0.1772	0.4818	0.0351	0.02743	0.06254	0.5204	0.05188	0.03492	0.0868	0.2798	0.008329	0.006474	0.0148	0.2517	0.01259	0.002321	0.01491	0.4802	0.068	0.02041	0.08841	1.6788	0.9274	0.2643	1.1917	11/24/2012	12/19/2012	F	Y	2	GW	2	1224	1225	5.2	8	10.1	12.2	12.9	13.8	14.8	15.8	16.8	16.5	15.9	16.5
2050	0.601	0.091	0.05014	0.1411	0.473	0.03112	0.02426	0.05538	0.459	0.03455	0.02481	0.05936	0.2315	0.005422	0.004727	0.01015	0.2136	0.008802	0.001721	0.01052	0.403	0.05166	0.01528	0.06694	1.4454	0.792	0.223	1.015	11/27/2012	12/24/2012	F	Y	2	WG	2	1147	1148	5.1	8.2	10.6	10.5	11.3	11.8	13.1	13	12.9	13.5	15.2	15.3
2066	0.8361	0.1989	0.1259	0.3248	0.707	0.0873	0.06621	0.1535	0.5748	0.0584	0.04546	0.1039	0.2683	0.008335	0.006512	0.01485	0.2751	0.01606	0.003214	0.01927	0.5362	0.09631	0.03035	0.1267	1.561	0.8515	0.2628	1.1143	12/4/2012	1/1/2013	M	Y	2	WG	2	1062	1059	5.1	8.9	11.4	15.5	20	20.1	21.3	22.5	23.5	25.1	24.4	25.4
2004	0.7634	0.1446	0.0867	0.2313	0.6331	0.06767	0.03962	0.1073	0.542	0.04886	0.03762	0.08648	0.2482	0.007621	0.005571	0.01319	0.2631	0.01713	0.002859	0.01999	0.5987	0.09454	0.026	0.1205	1.4706	0.789	0.2674	1.0563	11/22/2012	12/14/2012	M	Y	6	WG	2	625	624	5.6	11.3	12.5		17.9	17.9	17.5	21.9	22.4	24.5	25.4	26.8
2012	0.6102	0.1049	0.06349	0.1683	0.529	0.04065	0.03485	0.0755	0.4776	0.0379	0.02947	0.06737	0.229	0.006558	0.003936	0.01049	0.2249	0.009192	0.002074	0.01127	0.5166	0.07251	0.01819	0.0907	1.5033	0.8135	0.2253	1.0388	11/23/2012	12/21/2012	F	Y	2	WG	2	1017	1015	6.4	10	11.5	12.3	12.1	12	13.4	14.2	14	15	15.3	14.5
2043	0.6335	0.1246	0.06196	0.1865	0.6248	0.07937	0.04423	0.1236	0.5286	0.05182	0.0359	0.08772	0.2383	0.006694	0.006083	0.01278	0.2418	0.01506	0.001924	0.01698	0.4708	0.07519	0.02615	0.1013	1.6535	1.0231	0.2638	1.2869	11/25/2012	12/23/2012	M	Y	6	WG	2	669	739	6.6	12		19.1	22.4	22.7	24.2	24	25.3	26.8	25.1	25.6
2051	0.5513	0.08282	0.05425	0.1371	0.4853	0.03815	0.03111	0.06926	0.4679	0.03881	0.02691	0.06572	0.2338	0.006331	0.005667	0.012	0.2257	0.01001	0.002188	0.0122	0.4355	0.05948	0.01747	0.07695	1.4228	0.7323	0.2246	0.9569	11/27/2012	12/24/2012	F	Y	2	WG	2	1147	1148	4.9	7.7	10.2	10.7	11.1	12.7	13.4	13.2	14	14.8	15.2	14.8
2059	0.781	0.1698	0.09938	0.2692	0.612	0.06898	0.04713	0.1161	0.5735	0.06191	0.04991	0.1118	0.2618	0.008767	0.005501	0.01427	0.2562	0.01282	0.002799	0.01561	0.4515	0.07558	0.02425	0.09983	1.5292	0.9589	0.2331	1.1921	12/3/2012	12/26/2012	M	Y	2	GW	2	1010	1130	6	8.9	11.4	15.5	18.9	20.9	23.1	23.8	24.8	25.7	26.4	27.8
2075	0.869	0.1932	0.1083	0.3015	0.6772	0.07607	0.05596	0.132	0.5703	0.05795	0.04439	0.1023	0.3126	0.01208	0.008741	0.02082	0.3055	0.0156	0.004385	0.01999	0.6599	0.1265	0.04141	0.1679	1.7472	1.0318	0.2762	1.308	12/6/2012	1/3/2012	M	Y	2	GW	2	1132	1131	5.4		11.9	18.2	19	20.3	20.4	22.6	23.9	26.3	28.3	27.9
2044	0.5991	0.09674	0.06399	0.1607	0.4566	0.03212	0.02114	0.05326	0.4645	0.04118	0.0292	0.07038	0.2365	0.006124	0.005966	0.01209	0.2416	0.01282	0.002748	0.01557	0.3991	0.06216	0.01469	0.07686	1.4003	0.7292	0.2172	0.9465	11/26/2012	12/24/2012	F	Y	2	WG	2	1061	1063		10.5	13.2	12.3	13.4	14.5	15.1	15.6	15.3	15.8	15.5	15.6
2084	0.7413	0.1456	0.07792	0.2236	0.624	0.06224	0.04929	0.1115					0.2588	0.007964	0.006713	0.01468	0.2682	0.01684	0.002946	0.01978	0.5186	0.0897	0.02939	0.1191	1.6092	0.9584	0.2448	1.2032	12/10/2012	1/7/2013	M	Y	2	WG	2	1014	1013	6.8	10.3	12	17.1	20.4	20.3	21.1	21.8	22.3	23.5	24.4	24.2
2037	0.6369	0.1089	0.07599	0.1849	0.4793	0.03204	0.03149	0.06354	0.4919	0.0455	0.02992	0.07541	0.2562	0.006939	0.00571	0.01265	0.2256	0.01017	0.002052	0.01222	0.3626	0.0508	0.0175	0.0683	1.3128	0.7054	0.203	0.9085	11/24/2012	12/19/2012	F	Y	2	GW	2	1224	1225	4.2	6.9	8.6	11.6	12.9	14.4	14.2	14.1	14.4	15.5	15.3	16.4
2045	0.8579	0.2024	0.1106	0.313	0.7159	0.08114	0.05957	0.1407	0.5441	0.04993	0.04075	0.09068	0.2943	0.009909	0.007543	0.01745	0.2799	0.01987	0.002415	0.02228	0.4781	0.07774	0.02603	0.1038	1.5048	0.9299	0.2178	1.1477	11/26/2012	12/24/2012	M	Y	2	WG	2	1061	1063		10.8	12.3	15.4	18.6	19	19.8	21.7	23.1	25.7	26.3	27.7
2053	0.625	0.1036	0.06982	0.1734	0.4602	0.03492	0.02698	0.0619	0.4808	0.0458	0.02991	0.07571	0.2232	0.00603	0.005454	0.01148	0.2267	0.01108	0.002324	0.0134	0.4374	0.0604	0.01606	0.07646	1.6294	0.8789	0.2466	1.1255	11/27/2012	12/24/2012	F	Y	2	WG	2	1147	1148	5.4	8.2	10.4	11.6	13.3	14.4	14.8	15.1		15.9	16.6	16
2077	0.7905	0.1517	0.1088	0.2606	0.6538	0.07392	0.04701	0.1209	0.5333	0.04702	0.03855	0.08557	0.2708	0.009731	0.005494	0.01523	0.2785	0.01539	0.00312	0.01851	0.5599	0.09955	0.0246	0.1241	1.4859	0.8476	0.2124	1.06	12/6/2012	1/3/2012	M	Y	2	GW	2	1132	1131	5.1		12.8	13.7	19.5	20.7	20.4	22	22.9	23.6	23.5	25
2078	0.6115	0.1068	0.06731	0.1741	0.489	0.04207	0.03186	0.07393	0.4862	0.0469	0.03196	0.07886	0.2279	0.006493	0.005736	0.01223	0.2419	0.01491	0.002946	0.01786	0.4486	0.0758	0.02048	0.09629	1.5496	0.8759	0.2124	1.0883	12/6/2012	1/3/2012	F	Y	2	GW	2	1132	1131	5.8		11.5	11.1	11.9	13.9	14.1	15.5	15.2	16.2	15.6	15.9
2149	0.5804	0.09159	0.06187	0.1535	0.4688	0.03928	0.02439	0.06367	0.4731	0.04137	0.03514	0.07651	0.2595	0.008056	0.005727	0.01378	0.2951	0.02001	0.00315	0.02316	0.5259	0.08525	0.02736	0.1126	1.4588	0.7931	0.2195	1.0126	12/26/2012	1/22/2013	M	Y	2	GW	2	1010	1130	5.4	9.5	12.7	17.8	20.7	20.4	21.2	21.6	22.7	23.5	25	24.3
2103	0.6497	0.1076	0.0635	0.1711	0.5129	0.0313	0.03039	0.06169	0.5078	0.04519	0.03461	0.0798	0.2432	0.005637	0.004935	0.01057	0.2611	0.01187	0.002651	0.01452	0.4607	0.06045	0.01583	0.07628	1.5369	0.8168	0.2309	1.0477	12/14/2012	1/4/2013	F	Y	2	WG	2	1017	1015	5.2		10	11.8	14.4	14.7	14.4	14.7	14.5	15.3	15.6	16.5
2184	0.8785	0.206	0.1128	0.3187	0.6812	0.08595	0.05656	0.1425	0.6446	0.0709	0.04535	0.1162	0.2934	0.01	0.007833	0.01784	0.284	0.022	0.002375	0.02438	0.5797	0.1073	0.0239	0.1312	1.6905	0.9364	0.2811	1.2175	1/27/2013	2/24/2013	M	Y	6	WG	2	625	624	7.1	11.5	13.8	17.3	20.7	20.6	21.6	21.8	22.8	23.8	24	24.9
2163	0.5633	0.09352	0.05889	0.1524	0.5064	0.03786	0.03713	0.07499	0.5186	0.05047	0.03801	0.08848	0.2499	0.007139	0.006271	0.01341	0.2651	0.0161	0.002916	0.01902	0.5766	0.07786	0.02447	0.1023	1.5988	0.8336	0.2476	1.0812	1/1/2013	1/29/2013	F	Y	2	WG	2	1096	1097	5.1	7.5	10	11.8	13	13.7	13.8	13.2	14.7	14.6	15	14.8
2170	0.7988	0.1758	0.1018	0.2776	0.7269	0.1017	0.05512	0.1568	0.6224	0.06394	0.05173	0.1157	0.2908	0.01154	0.008897	0.02044	0.2825	0.01839	0.003464	0.02185	0.5557	0.1059	0.03278	0.1387	1.645	0.9587	0.2591	1.2178	1/4/2013	1/27/2013	M	Y	6	WG	2	625	624	7.1		13.1	17	20.5	20.4	21.3	22.6	23.1	23.7	23.5	25.8
2097	0.7893	0.1835	0.1023	0.2858	0.6557	0.07656	0.05557	0.1321	0.5585	0.05982	0.04176	0.1016	0.2738	0.00933	0.006135	0.01546	0.2728	0.0184	0.002849	0.02125	0.5698	0.09196	0.03209	0.1241	1.643	0.9579	0.199	1.1569	12/10/2012	1/7/2013	M	Y	2	GW	2	1011	1012	6.5	9.2	12.7	18.3	21.5	22.1	22.8	23.5	24.6	25.3	24.9	25.6
2105	0.5338	0.06377	0.04324	0.107	0.4661	0.03218	0.02659	0.05877	0.4464	0.03213	0.02274	0.05487	0.2078	0.00473	0.003948	0.008678	0.2453	0.01094	0.002995	0.01394	0.4817	0.05076	0.01694	0.06771	1.4349	0.728	0.2019	0.9299	12/14/2012	1/4/2013	F	Y	2	WG	2	1017	1015	5.2		9.5	11.5	13.1	13.4	13.8	14.6	13.4	13.6	14.9	14.9
2164	0.5666	0.09216	0.06251	0.1547	0.4633	0.03856	0.02807	0.06663	0.5107	0.0483	0.03054	0.07884	0.2798	0.00963	0.00727	0.0169	0.2902	0.01595	0.004105	0.02005	0.5515	0.08164	0.02346	0.1051	1.6372	0.8379	0.2362	1.0741	1/1/2013	1/29/2013	F	Y	2	WG	2	1096	1097	4.9	7.5	10.5	14.1	15.8	16.2	15.5	15.1	16.3	16.5	16.1	16
2130	0.7172	0.1377	0.0844	0.2221	0.643	0.06669	0.05694	0.1236	0.528	0.0503	0.03803	0.08833	0.2458	0.008875	0.005908	0.01478	0.2298	0.01243	0.002384	0.01482	0.4593	0.0742	0.02821	0.1024	1.4499	0.8398	0.1981	1.0379	12/19/2012	1/16/2013	M	Y	2	WG	2	1146	1144	4.6	7.9	10.5	14.7	20	19.2	20.7	20.8	21.7	21.7	21.7	23
2187	0.8854	0.1915	0.0991	0.2906	0.7363	0.1109	0.05408	0.165	0.6358	0.05988	0.04438	0.1043	0.3233	0.01286	0.00907	0.02193	0.2843	0.02096	0.002315	0.02327	0.6091	0.1081	0.02888	0.137	1.7003	1.0267	0.3008	1.3275	1/27/2013	2/24/2013	M	Y	6	WG	2	625	624	7.3	12.1	13.4	17.6	20.9	21.5	22.5	22.5	23.3	24.7	24.3	25
2108	0.5063	0.07194	0.04282	0.1148	0.4002	0.02602	0.0177	0.04372	0.3735	0.02567	0.01626	0.04193	0.1983	0.004447	0.003322	0.007768	0.1928	0.007991	0.001627	0.009618	0.3715	0.05328	0.01725	0.07053	1.1071	0.528	0.1559	0.6839	12/18/2012	1/15/2013	F	Y	2	WG	2	1098	1099	5.2	8	9.8	10.6	13.9	13.2	13.4	14.3	13.2	13.7	13.1	12.9
2189	0.8833	0.1796	0.09232	0.2719	0.7524	0.09657	0.05539	0.152	0.6449	0.06373	0.03908	0.1028	0.3045	0.009813	0.008196	0.01801	0.2844	0.0206	0.003036	0.02364	0.6096	0.115	0.02628	0.1412	1.8437	1.1931	0.3066	1.4997	1/27/2013	2/24/2013	M	Y	6	WG	2	625	624	6	10	11.6	16	18.5	18.5	20.4	20.4	21.8	22.4	23.3	24.5
2093	0.6542	0.1246	0.08143	0.2061	0.5565	0.05375	0.03361	0.08736	0.5421	0.05771	0.03961	0.09732	0.2888	0.0103	0.007526	0.01782	0.3029	0.01736	0.004212	0.02157	0.5678	0.0915	0.02674	0.1182	1.6527	0.9074	0.2639	1.1713	12/10/2012	1/7/2013	M	Y	2	GW	2	1011	1012	6.2	9	12.5	17.6	19.7	19.2	19.2	19	19.4	21.7	21.6	22.3
2133	0.5709	0.09248	0.06407	0.1566	0.4598	0.03702	0.02774	0.06476	0.487	0.04832	0.03322	0.08154	0.2735	0.009321	0.007413	0.01673	0.2489	0.01365	0.002694	0.01634	0.5381	0.07432	0.02037	0.09469	1.5612	0.7882	0.2364	1.0246	12/21/2012	1/18/2013	F	Y	2	GW	2	1224	1225	5.6	6.1	11.3	11.7	13.4	14.2	14.4	13.6	13.9	14.9	14.3	14.2
2148	0.5578	0.08065	0.04738	0.128	0.4762	0.03239	0.02777	0.06016	0.4175	0.0332	0.02459	0.05779	0.2087	0.005462	0.003905	0.009367	0.2087	0.01004	0.001705	0.01175	0.4287	0.06173	0.01718	0.07891	1.4212	0.6741	0.1917	0.8658	12/24/2012	1/21/2013	F	Y	2	WG	2	1147	1148	5.1	7.4	9.1	10.9	12.9	12.7	14.6	14.2	13.8	14	14	14.4
2314	0.8426	0.2166	0.1294	0.346	0.7262	0.1003	0.07362	0.1739	0.6577	0.09343	0.05108	0.1445	0.3295	0.01508	0.008687	0.02377	0.37075	0.02516	0.0073955	0.03295	0.7331	0.1304	0.041035	0.1677	1.9939	1.2141	0.3305	1.5446	2/27/2013	3/27/2013	M	Y	2	WG	2	1095	1097	5.7	10.1	12.9	16.9	22.8	22.5	23.1	24.9	26	27.3	27	27.9
2260	0.8171	0.1796	0.1035	0.2831	0.7151	0.07831	0.06181	0.1401	0.5905	0.0684	0.04379	0.1122	0.316	0.01246	0.008921	0.02138	0.3266	0.02644	0.004323	0.03076	0.6418	0.1167	0.03383	0.1505	1.6182	0.9267	0.2674	1.1941	2/20/2013	3/20/2013	M	Y	2	GW	2	1011	1083	4.9	9.2	12.3	14.7	19.5	20.6	21.5	22.3	22.9	23.9	24.4	24.9
2254	0.876	0.197	0.1265	0.3235	0.7419	0.08211	0.06294	0.145					0.2933	0.009376	0.007262	0.01664	0.2856	0.01797	0.002877	0.02085					1.8106	1.1193	0.2791	1.3984	2/20/2013	3/20/2013	M	Y	2	GW	2	1011	1083	5.2	8.4	12.1	18.6	22.2	24	23.5	23.9	25.2	26.3	26.4	27.3
2255	0.8492	0.1962	0.1073	0.3034	0.8038	0.1096	0.06783	0.1774	0.6149	0.06134	0.04408	0.1054	0.3182	0.0106	0.008242	0.01884	0.3217	0.02016	0.004267	0.02443	0.625	0.1025	0.03224	0.1347	1.663	0.9351	0.2668	1.2019	2/20/2013	3/20/2013	M	Y	2	GW	2	1011	1083	5.4	8.8	12.6	18	21.1	21.8	22.1	22.9	23.1	23.9	24.4	25.7
2263	0.7702	0.1608	0.09619	0.2569	0.6356	0.07461	0.0446	0.1192	0.5892	0.06154	0.04032	0.1019	0.2968	0.01067	0.007735	0.0184	0.3474	0.02715	0.005282	0.03243	0.6041	0.1115	0.03618	0.1477	1.7275	1.0122	0.2795	1.2917	2/25/2013	3/25/2013	M	Y	2	GW	2	1223	1130			14.9	18.8	20.8	22.1	22.8	22.9	23.9	24.8	25	24.8
568	0.7357	0.1568	0.0938	0.2506	0.5792	0.05843	0.03537	0.0938	0.5839	0.06441	0.03804	0.1025	0.2988	0.01265	0.007833	0.02049	0.2922	0.01695	0.004037	0.02098	0.6351	0.07906	0.03827	0.1173	1.8252	0.9754	0.3167	1.2921	7/11/2012	8/8/2012	F	Y	6	GW	2	653	663	4.6	11	15.6	18.7	19.5	20.8	22.8	23.6	21.3	24.5	22.2	23.7
707	0.7227	0.1547	0.09856	0.2533	0.6299	0.06565	0.05325	0.1189	0.5864	0.07044	0.04806	0.1185	0.2713	0.01033	0.007869	0.0182	0.2905	0.02229	0.003985	0.02627	0.5731	0.09033	0.0236	0.1139	1.7366	1.0216	0.3035	1.3251	9/6/2011	9/28/2011	F	Y	6	WG	2	652	624	5.6	10	11.7	13.9	16.7	17.5	17.5	18.3	18.6	19.1	18.1	19.1
715	0.6017	0.09662	0.05969	0.1563	0.5645	0.0523	0.04452	0.09682					0.2524	0.007025	0.00523	0.01226	0.2681	0.01729	0.002684	0.01997	0.414	0.06237	0.01703	0.0794	1.6886	0.9007	0.2708	1.1715	9/6/2011	10/3/2011	F	Y	6	GW	2	637	645	5.6	8.6	10.4	11	13.4	13.8	13.3	14.5	14.5	15.9	15.9	16.1
731	0.7912	0.1616	0.1081	0.2696	0.6913	0.08093	0.05843	0.1394	0.6373	0.07463	0.04993	0.1246	0.3212	0.01408	0.007591	0.02167	0.3965	0.02937	0.006186	0.03556	0.6454	0.1205	0.03432	0.1549	1.6433	1.0717	0.2714	1.3431	9/28/2011	10/26/2011	M	Y	6	WG	2	652	624	4.5	8.2	11	15	14.1	18.7	21	22.2	22.9	24.2	24.6	26.7
741	0.9096	0.2122	0.1241	0.3363	0.7926	0.1131	0.07632	0.1895	0.6146	0.07005	0.04353	0.1136	0.322	0.01426	0.008864	0.02312	0.3488	0.0254	0.005779	0.03118	0.6051	0.1212	0.03342	0.1546	1.6416	0.9176	0.2488	1.1664	10/3/2011	10/31/2011	M	Y	6	GW	2	637	645	5.1	8.2	11.4	16.1	19.7	19.6	21.4	23.5	25.7	27.3	27.3	27.2
758	0.6722	0.1358	0.07476	0.2105	0.5598	0.05872	0.04155	0.1003	0.5378	0.05735	0.03869	0.09604	0.253	0.008955	0.006543	0.0155	0.2691	0.01684	0.003329	0.02017	0.5361	0.08864	0.02804	0.1167	1.731	0.9548	0.2475	1.2022	10/12/2011	11/8/2011	M	Y	6	WG	2	626	624	5.8	10	13.1	16.5	16.5	16.6	17.6	18.4	18.1	19.4	19.8	20.3
569	0.769	0.1446	0.1102	0.2548	0.6649	0.06907	0.04559	0.1147	0.591	0.05463	0.03653	0.09116	0.2279	0.005652	0.004583	0.01023	0.2368	0.01441	0.001798	0.01621	0.591	0.09267	0.02937	0.122	1.7726	0.9257	0.2973	1.223	7/11/2012	8/8/2012	F	Y	6	GW	2	653	663	4.5	10.2	14.7	16.2	16.2	17	18.4	18.3	19.9	20.4	20.2	20.2
708	0.6181	0.1052	0.05719	0.1624	0.5474	0.05009	0.03894	0.08904	0.4907	0.04121	0.03547	0.07668	0.2513	0.007599	0.006044	0.01364	0.2779	0.01575	0.005224	0.02098	0.4956	0.08245	0.02213	0.1046	1.4384	0.7446	0.2362	0.9808	9/6/2011	10/3/2011	F	Y	6	GW	2	637	645	5.3	8.3	10.2	10.8	13.5	13.3	13.9	14.4	14.9	16.6	15.6	16.3
732	0.6096	0.0943	0.06432	0.1586	0.5983	0.06104	0.04667	0.1077	0.5355	0.05346	0.03712	0.09058	0.2131	0.006732	0.004845	0.01158	0.2224	0.01046	0.002481	0.01294	0.4535	0.07113	0.03347	0.1046	1.4079	0.7612	0.243	1.0042	9/28/2011	10/26/2011	M	Y	6	WG	2	652	624	5	8.5	11.9	14.8	17	17.7	19.1	18.9	19.4	20.5	19.4	20.3
742	0.5397	0.06369	0.04498	0.1087	0.4664	0.02876	0.02716	0.05592	0.4306	0.03363	0.02331	0.05694	0.216	0.005448	0.003818	0.009265	0.216	0.009415	0.001807	0.01122	0.4175	0.05555	0.02159	0.07713	1.383	0.672	0.1988	0.8707	10/3/2011	10/31/2011	F	Y	6	GW	2	637	645	4.2	6.9	8.8	10.4	12.3	12.3	12	13	11.3	13.7	13.9	14.3
751	0.7273	0.1304	0.08735	0.2178	0.6736	0.06604	0.05644	0.1225	0.5505	0.05356	0.03489	0.08845									0.5442	0.09644	0.02804	0.1245	1.7222	0.9019	0.2834	1.1854	10/11/2011	11/8/2011	F	Y	6	GW	2	643	645	5.3	8.8	11.4	14	17.5	16.8	17.8	18.3	19.6	18.9	18.9	19
759	0.5856	0.09325	0.05943	0.1527	0.5159	0.04291	0.03748	0.0804	0.4415	0.03978	0.02245	0.06222	0.198	0.005982	0.003809	0.009791	0.2082	0.0113	0.001601	0.0129	0.3881	0.06005	0.01566	0.07572	1.4729	0.6748	0.229	0.9038	10/12/2011	11/8/2011	F	Y	6	WG	2	626	624	5.6	9.5	12.2	13.3	14.4	15.6	15.6	15.4	15.6	16.1	16.9	17.2
709	0.6623	0.1069	0.06702	0.1739	0.57	0.05206	0.04016	0.09222	0.4895	0.04155	0.0302	0.07175	0.2583	0.006772	0.005734	0.01251	0.2285	0.01235	0.001818	0.01417	0.4788	0.07565	0.0218	0.09745	1.6099	0.9375	0.2505	1.1881	9/6/2011	10/3/2011	F	Y	6	GW	2	637	645	5.4	8.3	11.6	12.2	14.8	15.6	16	16.1	16.6	17.8	17.3	18
725	0.7909	0.1512	0.096	0.2472	0.7015	0.07588	0.06779	0.1437	0.6037	0.06126	0.04458	0.1058	0.2842	0.01087	0.007008	0.01788	0.2906	0.01815	0.003067	0.02122	0.5808	0.1093	0.03148	0.1408	1.6638	0.9216	0.2612	1.1828	9/28/2011	10/26/2011	M	Y	6	WG	2	652	624	4.7	8.2	11.1	14.6	18.5	19.5	20.6	19.9	20.9	21.9	21.8	22.1
743	0.637	0.09705	0.07131	0.1684	0.5199	0.04187	0.0381	0.07997	0.4881	0.04141	0.02685	0.06826	0.2375	0.006765	0.004581	0.01135	0.2315	0.01109	0.002256	0.01335	0.4953	0.06643	0.02762	0.09405	1.638	0.8384	0.2634	1.1018	10/3/2011	10/31/2011	F	Y	6	GW	2	637	645	5	7.6	9.6	11.3	14.6	14.9	14.2	15.8	16.5	16.3	16.3	17.2
752	0.707	0.1284	0.09422	0.2226	0.6504	0.07362	0.04731	0.1209	0.5743	0.05422	0.04416	0.09838	0.2298	0.006769	0.004885	0.01165	0.2679	0.01769	0.00235	0.02004	0.5875	0.09976	0.02812	0.1279	1.4834	0.7697	0.2278	0.9975	10/11/2011	11/8/2011	M	Y	6	GW	2	643	645	4	7.5	9.3	12.6	14.9	15.1	16.5	16.6	17.6	18.3	18.3	19
760	0.7485	0.1392	0.09539	0.2346	0.626	0.07124	0.04789	0.1191	0.5887	0.07049	0.04558	0.1161	0.2731	0.008293	0.007927	0.01622	0.3026	0.01991	0.004614	0.02452	0.5043	0.08689	0.02865	0.1155	1.3142	0.641	0.1994	0.8403	11/7/2011	12/6/2011	M	Y	6	GW	2	643	645	4.6	8	10.3	13	15.2	15.1	15.6	15.5	15.3	16.7	16.6	15.6
702	0.6618	0.1349	0.08294	0.2179	0.6094	0.05765	0.04128	0.09893	0.5488	0.05703	0.04219	0.09922	0.2648	0.008989	0.006033	0.01502	0.2741	0.0176	0.00271	0.02031	0.5979	0.09544	0.02828	0.1237	1.6553	0.9061	0.2667	1.1728	9/6/2011	9/28/2011	F	Y	6	WG	2	652	624	6.4	10.6	12.1	13.8	16.1	17.1	17	18.5	18.7	19.3	20.3	20.3
710	0.6736	0.1166	0.07185	0.1884	0.5944	0.05563	0.04721	0.1028	0.5493	0.05285	0.03699	0.08984	0.261	0.008114	0.00614	0.01425	0.2897	0.01703	0.002868	0.01989	0.4639	0.07762	0.01953	0.09716	1.5528	0.8467	0.2348	1.0815	9/6/2011	10/3/2011	F	Y	6	GW	2	637	645	5.7	8.7	10.6	11.7	14.9	15.3	15.7	16.8	16.6	18.3	17.9	18.5
726	0.6262	0.09877	0.06072	0.1595	0.5938	0.05861	0.04987	0.1085	0.5461	0.05541	0.03846	0.09387	0.2667	0.01137	0.005668	0.01704	0.2776	0.02062	0.003055	0.02367	0.5164	0.08573	0.02482	0.1105	1.4411	0.871	0.2291	1.1001	9/28/2011	10/26/2011	M	Y	6	WG	2	652	624	4.8	8	10.7	12.9	16.3	17.8	19.1	17.6	18.2	19.4	18.7	20.1
744	0.7039	0.1234	0.09738	0.2208	0.5972	0.0668	0.04244	0.1092	0.5759	0.05297	0.03667	0.08964	0.3096	0.01206	0.007781	0.01984	0.2418	0.01379	0.002238	0.01602	0.5395	0.0828	0.02326	0.1061	1.6285	0.8265	0.2517	1.0783	10/3/2011	10/31/2011	F	Y	6	GW	2	637	645	5.1	8.2	10.2	13.3	16.4	16.6	16.1	17.6	17.8	17.8	20.6	18.4
753	0.7445	0.1534	0.08699	0.2403	0.6297	0.07292	0.0491	0.122	0.5408	0.05475	0.04284	0.09759	0.2534	0.009996	0.006765	0.01676	0.261	0.01707	0.002744	0.01981	0.4948	0.08549	0.0251	0.1106	1.3945	0.7433	0.2255	0.9688	10/11/2011	11/8/2011	M	Y	6	GW	2	643	645	4.9	7.9	10.6	13.7	17	17.7	18.6	19.2	20.3	20.2	20	19.6
761	0.7752	0.1494	0.08325	0.2326	0.6208	0.06662	0.05535	0.122	0.582	0.06005	0.04237	0.1024	0.3049	0.01094	0.007142	0.01808	0.3148	0.01546	0.004736	0.02019	0.589	0.1006	0.02992	0.1305	1.6798	0.9217	0.2566	1.1783	11/7/2011	12/6/2011	F	Y	6	GW	2	643	645	4.5	7.9	10	12.1	15.8	16.8	17.8	18.4	18.6	19.9	20.5	20.6
703	0.6307	0.1108	0.06999	0.1808	0.5823	0.06162	0.03755	0.09917	0.49	0.04452	0.03111	0.07563	0.2348	0.006765	0.005289	0.01205	0.2739	0.0175	0.00353	0.02103	0.4278	0.06755	0.01874	0.08628	1.6352	0.8503	0.2735	1.1238	9/6/2011	9/28/2011	M	Y	6	WG	2	652	624	6.2	10.3	11.9	15.7	18.9	18.7	19.1	20	21.4	22	20.6	21.2
711	0.6914	0.1157	0.08295	0.1987	0.6336	0.07363	0.05062	0.1242	0.527	0.0521	0.03582	0.08791	0.2791	0.008726	0.007571	0.0163	0.2694	0.0144	0.003258	0.01766	0.4406	0.06714	0.02095	0.0881	1.3542	0.6711	0.2082	0.8793	9/6/2011	10/3/2011	M	Y	6	GW	2	637	645	5.4	8.2	9.9	11.5	15.5	15.3	15.4	16.3	16.9	18	17.5	18.3
727	0.7361	0.1499	0.09233	0.2422	0.6701	0.0875	0.04818	0.1357	0.5991	0.06735	0.05061	0.118	0.288	0.01215	0.007276	0.01942	0.2962	0.02325	0.003153	0.0264	0.5774	0.1006	0.0362	0.1368	1.5637	0.879	0.2492	1.1282	9/28/2011	10/26/2011	M	Y	6	WG	2	652	624	4.9	8.5	11.2	13	18.2	19.3	19.5	20.1	20.8	22.2	22.6	23.6
745	0.6853	0.1192	0.07514	0.1943	0.5291	0.04687	0.04036	0.08723	0.5376	0.05097	0.03453	0.0855	0.2542	0.009506	0.00631	0.01582	0.2556	0.01737	0.002394	0.01977	0.5578	0.09096	0.02665	0.1176	1.4494	0.6857	0.2162	0.9019	10/3/2011	10/31/2011	M	Y	6	GW	2	637	645	5.1	8.3	10.5	12.9	17.4	17.6	17	18.4	18.6	18.3	19.5	19.9
754	0.7171	0.1389	0.08601	0.2249	0.7155	0.09099	0.06319	0.1542	0.5105	0.04594	0.03223	0.07816	0.2583	0.008261	0.007237	0.0155	0.2583	0.01714	0.002621	0.01976	0.4785	0.08538	0.02695	0.1123	1.5145	0.7426	0.2311	0.9737	10/11/2011	11/8/2011	M	Y	6	GW	2	643	645	4.8	8.7	11.3	16.1	16.8	17.3	17.1	17.7	18.5	19	19.1	20
762	0.7993	0.1773	0.09748	0.2748	0.7778	0.1174	0.08681	0.2042	0.6103	0.07722	0.04995	0.1272	0.3235	0.01409	0.009419	0.02351	0.3378	0.02875	0.004355	0.0331	0.5832	0.1083	0.03564	0.1439	1.5846	0.8457	0.2735	1.1192	11/7/2011	12/6/2011	M	Y	6	GW	2	643	645	5	8.8	11.7	16.4	21	20.9	21	21.2	21.3	22.3	23.4	23.4
704	0.6676	0.129	0.07016	0.1992	0.6229	0.06614	0.05144	0.1176	0.5479	0.05598	0.04051	0.09649	0.2587	0.009771	0.006813	0.01658	0.2897	0.01898	0.005049	0.02403	0.4791	0.0731	0.02571	0.0988	1.4867	0.7791	0.231	1.0101	9/6/2011	9/28/2011	M	Y	6	WG	2	652	624	6.9	10.8	12.4	14.6	17.6	18	19.2	20.3	21	21.7	20.4	20.3
712	0.6155	0.09	0.05746	0.1475	0.5004	0.04115	0.03458	0.07572	0.4486	0.03617	0.02571	0.06188	0.2182	0.005707	0.004297	0.01	0.2321	0.01145	0.002691	0.01414	0.4409	0.06085	0.01598	0.07683	1.4582	0.6967	0.2088	0.9056	9/6/2011	10/3/2011	F	Y	6	GW	2	637	645	5	7.8	9.3	10.8	11.5	12	12.3	12.7	12.6	13.8	13.3	13.5
728	0.69	0.123	0.0751	0.1981	0.6287	0.06573	0.0479	0.1136	0.5127	0.04449	0.03858	0.08307	0.2475	0.007441	0.005379	0.01282	0.2286	0.0118	0.002327	0.01412	0.4657	0.08943	0.02094	0.1104	1.4536	0.7979	0.2273	1.0252	9/28/2011	10/26/2011	M	Y	6	WG	2	652	624	4.7	8.1	10.7	14	18	18.1	19.1	18.4	19.2	19.8	19.3	20.2
746	0.6332	0.1053	0.05908	0.1643	0.5638	0.0593	0.03759	0.09689	0.495	0.04179	0.03305	0.07484	0.1991	0.005902	0.003943	0.009845	0.2083	0.01131	0.001864	0.01317	0.4992	0.08176	0.02234	0.1041	1.494	0.7294	0.2042	0.9336	10/3/2011	10/31/2011	M	Y	6	GW	2	637	645	4.9	7.7	10.1	13.3	17.1	16.9	16.5	17.5	17.7	17.9	18.5	19
755	0.621	0.1095	0.07845	0.1879	0.4993	0.04352	0.0367	0.08022	0.4705	0.04502	0.02992	0.07493	0.2578	0.008515	0.006777	0.01529	0.2788	0.01654	0.003779	0.02032	0.4109	0.06926	0.01861	0.08787	1.5524	0.7952	0.2472	1.0424	10/11/2011	11/8/2011	F	Y	6	GW	2	643	645	5.1	8.5	11.1	10.1	11	12.2	13.3	14.1	18.2	15.8	15.3	15.3
763	0.7075	0.1229	0.07174	0.1946	0.6054	0.05144	0.04884	0.1003	0.5865	0.05768	0.0426	0.1003	0.2652	0.008291	0.006615	0.01491	0.2696	0.01336	0.003639	0.017	0.5467	0.0837	0.02607	0.1098	1.5617	0.7878	0.2293	1.0172	11/7/2011	12/6/2011	F	Y	6	GW	2	643	645	4.3	7.5	9.8	13	16.9	16.7	17	17.2	18.2	19.7	19.4	19
705	0.684	0.1259	0.07312	0.199	0.6142	0.06326	0.04354	0.1068	0.5617	0.0582	0.03864	0.09684	0.2747	0.008082	0.005702	0.01378	0.2925	0.01994	0.00338	0.02332	0.5149	0.08435	0.02063	0.105	1.6632	0.873	0.2837	1.1567	9/6/2011	9/28/2011	F	Y	6	WG	2	652	624	6.8	10.9	11.9	13.1	15.2	16.8	17.6	18.5	18.9	18.9	19.7	19.6
713	0.6077	0.1183	0.07049	0.1888	0.6178	0.07761	0.04968	0.1273	0.5402	0.06325	0.04825	0.1115	0.2707	0.01004	0.007888	0.01792	0.2998	0.01976	0.004528	0.02429	0.6785	0.1177	0.02833	0.1461	1.5654	0.832	0.2436	1.0756	9/6/2011	10/3/2011	M	Y	6	GW	2	637	645	5.8	8.8	11.2	13.4	17	17.4	17.26	18	18.2	19.7	19.7	20.1
729	0.6798	0.1269	0.07574	0.2026	0.5735	0.05085	0.03842	0.08926	0.548	0.05131	0.03582	0.08713	0.2822	0.009546	0.007494	0.01704	0.3136	0.01967	0.003702	0.02337	0.4897	0.07169	0.0279	0.0996	1.4772	0.7429	0.2418	0.9846	9/28/2011	10/26/2011	F	Y	6	WG	2	652	624	4.6	7.9	10.7	13.6	16	15.1	15.9	16.1	17.7	17.5	17.8	18.5
747	0.6907	0.1138	0.07189	0.1857	0.5924	0.05421	0.0472	0.1014	0.5468	0.05239	0.03417	0.08656	0.2369	0.006495	0.004212	0.01071	0.2442	0.0126	0.002053	0.01466	0.5124	0.07423	0.02559	0.09981	1.7782	0.8656	0.2704	1.1361	10/3/2011	10/31/2011	F	Y	6	GW	2	637	645	4.5	7.5	9.7	11.4	14.2	14.4	13.8	14.3	14.8	14.4	15	15.2
756	0.5995	0.09107	0.04733	0.1384	0.5521	0.05286	0.03802	0.09088	0.4628	0.03919	0.02986	0.06905	0.2663	0.008391	0.00641	0.0148	0.3056	0.02196	0.003534	0.02549	0.4362	0.07355	0.01915	0.09269	1.4639	0.8493	0.2091	1.0585	10/11/2011	11/8/2011	F	Y	6	GW	2	643	645	4.5	7.7	10.2	10.5	13.6	13	14	14	14.7	15.4	14.3	14.6
764	0.7948	0.1824	0.1137	0.2961	0.7341	0.1092	0.06624	0.1755	0.5422	0.05516	0.04166	0.09682	0.2723	0.009211	0.007728	0.01694	0.2704	0.01549	0.002954	0.01844	0.5335	0.0876	0.0337	0.1213	1.5533	1.0097	0.2569	1.2666	11/7/2011	12/6/2011	M	Y	6	GW	2	643	645	4.6	7.9	10.5	15.1	17.9	18.1	19	18.9	19.1	21.1	21.7	21.4
706	0.7115	0.1338	0.07495	0.2087	0.6788	0.07507	0.04571	0.1208	0.5214	0.05092	0.03319	0.08411	0.2579	0.008652	0.006077	0.01473	0.2629	0.01402	0.003634	0.01765	0.5702	0.08094	0.01986	0.1008	1.6204	0.8354	0.2523	1.0877	9/6/2011	9/28/2011	F	Y	6	WG	2	652	624	6.5	10.9	13	14.2	17	18	18.2	18.5	18.9	19.7	19.3	19.9
714	0.5834	0.08949	0.06078	0.1503	0.5004	0.03736	0.03411	0.07147	0.4456	0.038	0.02768	0.06569	0.2261	0.005944	0.004954	0.0109	0.2308	0.01186	0.002212	0.01408	0.4023	0.05584	0.01747	0.07331	1.6386	0.9688	0.2703	1.2391	9/6/2011	10/3/2011	F	Y	6	GW	2	637	645	5.4	8.4	10.4	10.9	13	14.2	14	14.9	15	16.2	15.8	16.9
730	0.851	0.1807	0.1138	0.2945	0.808	0.111	0.09046	0.2015	0.6052	0.07554	0.04564	0.1212	0.3011	0.012	0.008388	0.02039	0.3465	0.02617	0.004674	0.03085	0.6468	0.115	0.04117	0.1562	1.5563	0.8854	0.2382	1.1236	9/28/2011	10/26/2011	M	Y	6	WG	2	652	624	4.8	8	10.5	13.4	17.3	18.4	18.6	19.1	20.1	21.8	22.8	23.5
740	0.7539	0.1487	0.07836	0.2271	0.7079	0.08516	0.0599	0.1451	0.5577	0.05454	0.03886	0.0934	0.3357	0.0143	0.008509	0.02281	0.3169	0.01907	0.003977	0.02305	0.5941	0.1	0.02894	0.1289	1.6189	0.9252	0.2354	1.1606	10/3/2011	10/31/2011	F	Y	6	GW	2	637	645	5.1	8.4	10.8	13.8	16.8	17.1	17.2	18.7	18.9	19.6	20.8	21.8
749	0.5944	0.09025	0.06084	0.1511	0.5474	0.05046	0.03934	0.0898	0.5275	0.05018	0.03269	0.08287	0.2478	0.007367	0.006487	0.01385	0.2378	0.01276	0.002269	0.01503	0.4626	0.06829	0.02431	0.0926	1.3885	0.7388	0.2098	0.9486	10/11/2011	11/8/2011	F	Y	6	GW	2	643	645	4.1	7.7	10.1	11.5	13.9	13.8	14.7	14.5	15.1	15.8	14.8	15
757	0.7911	0.1654	0.09785	0.2632	0.6905	0.07694	0.05626	0.1332	0.6842	0.08013	0.05841	0.1385	0.2783	0.00881	0.006218	0.01503	0.3206	0.01874	0.004401	0.02314	0.6365	0.1052	0.03714	0.1423	1.965	1.1143	0.3143	1.4286	10/12/2011	11/8/2011	F	Y	6	WG	2	626	624	5.4	9.8	14	16.8	18.6	20.3	22.4	22.4	21.4	22.3	22.3	22.8
765	0.647	0.1169	0.07046	0.1873	0.6155	0.06277	0.05727	0.12	0.4459	0.0377	0.0311	0.0688	0.2263	0.006753	0.005728	0.01248	0.1881	0.008037	0.001571	0.009608	0.449	0.0711	0.0234	0.09451	1.4498	0.7579	0.2095	0.9674	11/7/2011	12/6/2011	F	Y	6	GW	2	643	645	4.5	7.9	10.4	12.8	15.2	14.9	15.5	15.3	16.1	17.8	17.7	17.8
773	0.7168	0.1499	0.1072	0.2572	0.6123	0.07838	0.04114	0.1195	0.5761	0.06665	0.04846	0.1151	0.2634	0.009129	0.006565	0.01569	0.2658	0.01996	0.00266	0.02262	0.5318	0.1066	0.02407	0.1306	1.6402	0.9934	0.2699	1.2634	11/7/2011	12/6/2011	M	Y	6	WG	2	626	624	5.5	11.1	14.1	18.4	22.3	20.1	19.4	19.1	19.3	20.8	21.4	21.4
810	0.7662	0.1735	0.09847	0.272	0.6334	0.06736	0.05909	0.1264	0.6138	0.07609	0.05259	0.1287	0.2681	0.00827	0.006526	0.0148	0.3006	0.0207	0.003381	0.02408	0.6002	0.1007	0.03759	0.1383	1.5934	0.918	0.2622	1.1802	11/14/2011	12/8/2011	F	Y	6	GW	2	638	654	5.3	8.5	12.1	14.7	16.5	16.4	16.8	17.5	18.5	19.6	20.2	20.4
818	0.6541	0.1073	0.06492	0.1722	0.5736	0.04765	0.04205	0.0897	0.4791	0.04044	0.03026	0.0707	0.257	0.006838	0.005471	0.01231	0.2417	0.0111	0.002011	0.01311	0.5102	0.08164	0.01992	0.1016	1.6897	0.9086	0.2798	1.1884	12/1/2011	12/29/2011	F	Y	6	GW	2	640	655	5.7	9.3	11.4	13.9	16.6	16.8	16.9	17.2	17.6	18.7	18	18.8
851	0.6251	0.106	0.06971	0.1757	0.6512	0.07585	0.04658	0.1224	0.4719	0.03645	0.02747	0.06392	0.2457	0.008505	0.005034	0.01354	0.2352	0.01259	0.002156	0.01474	0.4225	0.06588	0.01996	0.08584	1.3829	0.7489	0.2027	0.9516	12/6/2011	1/3/2012	M	Y	6	GW	2	653	663	4.2	8.5	10.4	12.5	16.5	17.2	18.6	19.6	20	20.8	20.8	21.7
874	0.7848	0.1441	0.1028	0.2469	0.6676	0.0796	0.04314	0.1227	0.5428	0.05118	0.03413	0.08531	0.2618	0.006542	0.006173	0.01271	0.2242	0.01456	0.001686	0.01624	0.4946	0.08425	0.02716	0.1114	1.3777	0.6439	0.2112	0.8552	12/8/2011	1/5/2011	M	Y	6	GW	2	638	654	4.9	7.6	10.2	12.3	16.9	18.4	18.9	19.2	20.3	20.7	21	21.7
893	0.6869	0.1156	0.07911	0.1947	0.5906	0.06201	0.04586	0.1079	0.524	0.05129	0.03626	0.08755	0.2494	0.007876	0.006091	0.01397	0.2559	0.01361	0.003357	0.01697	0.4866	0.08013	0.02405	0.1042	1.4656	0.7283	0.2153	0.9436	12/15/2011	1/11/2012	M	Y	6	GW	2	657	658	4.8	7.8		11	14.2	15	15.1	15.4	16.9	18.6	18.5	19.1
766	0.658	0.1169	0.08021	0.1971	0.5723	0.0549	0.04694	0.1018	0.4748	0.04096	0.03319	0.07415	0.2369	0.007357	0.004759	0.01212	0.2509	0.01617	0.001937	0.01811	0.4706	0.06979	0.02619	0.09598	1.6258	0.8332	0.2581	1.0913	11/7/2011	12/6/2011	F	Y	6	GW	2	643	645	4.4	7.8	9.8	11.8	15.1	15.7	16.6	17	17.5	18.2	18.2	18.6
804	0.6535	0.1183	0.07483	0.1932	0.6002	0.05757	0.04907	0.1066	0.5032	0.04597	0.0305	0.07647	0.2689	0.00893	0.006519	0.01545	0.2035	0.009585	0.001637	0.01122	0.5169	0.07834	0.02185	0.1002	1.5473	0.8346	0.2601	1.0947	11/14/2011	12/8/2011	F	Y	6	GW	2	638	654	4.8	8	11	13.7	16.9	17.7	17.6	17.1	18.5	21	19.6	20.3
811	0.6344	0.105	0.06399	0.169	0.544	0.05296	0.03825	0.09121	0.4676	0.04193	0.02624	0.06817	0.2344	0.006477	0.005763	0.01224	0.2618	0.01383	0.003328	0.01715	0.4334	0.06587	0.01798	0.08385	1.5196	0.8454	0.2427	1.0881	11/21/2011	12/15/2011	F	Y	6	GW	2	657	658	5.6	9.3	12.1	14	15	14.7	16.6	17.1	17.2	17.5	17.3	17.4
819	0.7432	0.1535	0.08586	0.2394	0.664	0.06695	0.05473	0.1217	0.5655	0.05542	0.03291	0.08833	0.2547	0.006482	0.005884	0.01237	0.2382	0.01514	0.001798	0.01694	0.4608	0.07654	0.02385	0.1004	1.6575	0.9158	0.2649	1.1807	12/1/2011	12/29/2011	M	Y	6	GW	2	640	655	4.9	8.2	10.4	13.7	17.8	17.7	17.8	18.2	18.9	19.7	20.7	20.5
852	0.663	0.1247	0.07545	0.2002	0.6239	0.07138	0.04803	0.1194	0.5349	0.05219	0.03948	0.09167	0.2167	0.006632	0.00505	0.01168	0.2071	0.01112	0.001394	0.01252	0.5014	0.08528	0.02852	0.1138	1.6838	0.9319	0.255	1.187	12/6/2011	1/3/2012	M	Y	6	GW	2	653	663	4.6	8.4	10.7	12.7	17.4	17.2	18.1	19.3	19.4	19.8	19.7	20
894	0.6862	0.1305	0.08189	0.2124	0.6358	0.07881	0.04955	0.1284	0.4845	0.04364	0.03557	0.07921	0.2438	0.008423	0.005799	0.01422	0.2664	0.0183	0.002654	0.02095	0.4358	0.06712	0.02263	0.08975	1.3175	0.7071	0.2052	0.9123	12/15/2011	1/11/2012	M	Y	6	GW	2	657	658	5.2	8.3		14.8	18.8	18.7	20	20.8	21.3	21.9	21.8	23
767	0.662	0.1256	0.07363	0.1992	0.66	0.07604	0.05541	0.1314	0.579	0.05668	0.04779	0.1045	0.2662	0.009005	0.00701	0.01602	0.2648	0.0145	0.002877	0.01737	0.5058	0.08664	0.02045	0.1071	1.6335	0.9211	0.254	1.1751	11/7/2011	12/6/2011	F	Y	6	GW	2	643	645	4.7	8.6	11.5	14.7	18	17.9	18.5	18.6	19.8	21.1	20.4	20.2
805	0.6545	0.1147	0.08136	0.196	0.5362	0.04907	0.03803	0.0871	0.4985	0.04675	0.03333	0.08008	0.2034	0.004866	0.004271	0.009137	0.1994	0.007898	0.001905	0.009803	0.4138	0.06526	0.01638	0.08164	1.5443	0.7635	0.2453	1.0089	11/14/2011	12/8/2011	F	Y	6	GW	2	638	654	4.8	8	10.3	11.3	15	16.7	15.8	15.6	16.4	18.2	18.3	18
812	0.6141	0.09931	0.06536	0.1647	0.5693	0.04324	0.03617	0.07941	0.4767	0.03825	0.02666	0.06491	0.2262	0.005448	0.004411	0.009859	0.1972	0.008432	0.001407	0.009839	0.4415	0.07017	0.01541	0.08558	1.6016	0.9598	0.2546	1.2144	11/21/2011	12/15/2011	F	Y	6	GW	2	657	658	5.5	9.1	10.5	12.8	14.2	15.2	16.8	17.7	17.2	17.7	18.2	18.6
820	0.7127	0.1308	0.07924	0.21	0.6113	0.0534	0.04292	0.09632	0.5541	0.05035	0.03281	0.08315	0.2974	0.009496	0.007244	0.01674	0.2817	0.01815	0.002555	0.02071	0.5135	0.07417	0.02314	0.09731	1.8669	1.0481	0.2897	1.3377	12/1/2011	12/29/2011	F	Y	6	GW	2	640	655	5.1	8.6	10.8	14.3	16.9	16.2	16.6	17.6	18.9	18.9	18.9	19.6
853	0.7422	0.1496	0.06454	0.2141	0.5877	0.05987	0.03597	0.09584	0.5654	0.06088	0.03722	0.0981	0.26	0.00834	0.006866	0.01521	0.254	0.01847	0.001911	0.02038	0.6851	0.1233	0.03049	0.1538	1.777	1.099	0.2697	1.3687	12/6/2011	1/3/2012	M	Y	6	GW	2	653	663	4	6.5	10	14.3	19.3	20.1	22.4	23.6	24.7	25.8	26.3	27.1
895	0.7082	0.1196	0.07447	0.194	0.5907	0.05214	0.04302	0.09516	0.5014	0.04745	0.02862	0.07607	0.245	0.007009	0.004958	0.01197	0.2593	0.01571	0.00229	0.018	0.4587	0.06835	0.02076	0.08911	1.6481	0.8431	0.2508	1.0939	12/15/2011	1/11/2012	F	Y	6	GW	2	657	658	4.9	7.8		11.8	14.9	15.4	15.9	17	16.2	16.4	16.9	17.8
768	0.7232	0.1442	0.1014	0.2455	0.6356	0.07515	0.05597	0.1311	0.5566	0.05905	0.04236	0.1014	0.2761	0.009229	0.008549	0.01778	0.2614	0.01624	0.003011	0.01925	0.5997	0.09514	0.02926	0.1244	1.4543	0.7407	0.2202	0.9609	11/7/2011	12/6/2011	M	Y	6	GW	2	643	645	4.4	7.9	10.8	14.9	17	17.2	17.6	18.3	18.5	19.9	20.2	19.8
806	0.7558	0.1674	0.109	0.2764	0.6847	0.08991	0.06054	0.1505	0.5367	0.05434	0.0417	0.09604	0.2686	0.007999	0.006812	0.01481	0.2683	0.01754	0.002553	0.02009	0.6038	0.1114	0.02327	0.1346	1.616	0.9228	0.257	1.1798	11/14/2011	12/8/2011	M	Y	6	GW	2	638	654	4.5	7.6	10.4	12.8	17.3	18	18.3	18.3	19.3	20	19.8	19.8
813	0.679	0.1118	0.0725	0.1843	0.6419	0.06247	0.05158	0.114	0.487	0.03921	0.02966	0.06888	0.241	0.006617	0.005341	0.01196	0.2398	0.01202	0.002726	0.01474	0.4422	0.06939	0.0185	0.08789	1.6224	0.7996	0.2419	1.0415	11/21/2011	12/15/2011	F	Y	6	GW	2	657	658	5.5	9	11.1	13.5	15.3	15.1	15.7	16.6	17.9	18.7	18	18.3
821	0.7226	0.1273	0.0831	0.2104	0.5963	0.05597	0.04516	0.1011	0.5487	0.0517	0.04421	0.09591	0.2757	0.007633	0.007336	0.01497	0.2776	0.01474	0.002945	0.01768	0.5314	0.08158	0.02367	0.1052	1.6767	0.9127	0.2678	1.1805	12/1/2011	12/29/2011	F	Y	6	GW	2	640	655	5.5	9	10.9	13.8	15.2	14.3	15.3	16.2	16.8	17.2	18.1	18.1
877	0.8106	0.1708	0.1169	0.2877	0.7373	0.105	0.07004	0.175	0.5846	0.06186	0.04121	0.1031	0.3093	0.01085	0.009061	0.01991	0.2865	0.01613	0.003454	0.01959	0.54	0.1116	0.02277	0.1343	1.4012	0.7734	0.216	0.9894	12/8/2011	1/5/2011	M	Y	6	GW	2	638	654	5.1	7.9	11.2	16.7	19.9	20.3	21.2	22.4	23.6	25.1	24.8	25.3
888	0.6797	0.1254	0.0765	0.2019	0.5505	0.04842	0.0412	0.08962	0.5093	0.0419	0.03517	0.07707	0.2552	0.006985	0.005825	0.01281	0.2389	0.01489	0.001905	0.01679	0.455	0.06608	0.01993	0.08601	1.5661	0.8237	0.2473	1.0711	12/15/2011	1/11/2012	F	Y	6	GW	2	657	658	4.5	7.6		12	14.4	15.4	15.8	16.4	16.9	16.5	17.06	18
896	0.6694	0.1152	0.06984	0.185	0.6375	0.06441	0.04967	0.1141	0.4732	0.04102	0.03166	0.07268	0.2598	0.008731	0.00601	0.01474	0.2381	0.01232	0.001971	0.01429	0.4973	0.08352	0.02305	0.1066	1.573	0.9417	0.2521	1.1938	12/15/2011	1/11/2012	M	Y	6	GW	2	657	658	4.4	7.3		13.6	17.3	16.5	17.3	18.5	19.2	19.5	20.1	21.4
769	0.8378	0.1758	0.118	0.2939	0.6887	0.07906	0.06135	0.1404	0.6301	0.06693	0.05328	0.1202	0.284	0.0089	0.007587	0.01649	0.2642	0.01093	0.003444	0.01437	0.6157	0.1132	0.03335	0.1466	1.7651	0.9407	0.2694	1.2101	11/7/2011	12/6/2011	F	Y	6	GW	2	643	645	4.4	7.8	10.2	12.9	14.6	15.2	16.4	18.8	20.5	21.7	21.8	21.7
814	0.6456	0.1099	0.06899	0.1789	0.571	0.05471	0.0399	0.09461	0.4996	0.04618	0.0305	0.07668	0.2705	0.00886	0.007471	0.01633	0.261	0.0134	0.0031	0.0165	0.5362	0.08525	0.02284	0.1081	1.6324	0.935	0.2639	1.199	11/21/2011	12/15/2011	F	Y	6	GW	2	657	658	5.5	9.6	11.1	12.8	14.9	15	16.7	18.2	18.1	18.1	16.9	17.8
822	0.6832	0.1198	0.08714	0.2069	0.5826	0.06124	0.04722	0.1085	0.5328	0.05458	0.0425	0.09707	0.2594	0.01007	0.007074	0.01714	0.2617	0.01435	0.003657	0.01801	0.5285	0.08713	0.0201	0.1072	1.7685	0.9959	0.2726	1.2685	12/1/2011	12/29/2011	F	Y	6	GW	2	640	655	5.1	8.7	10.3	12.6	14.6	14.3	14.3	14.8	16.1	16	16.6	16.6
878	0.864	0.2024	0.121	0.3234	0.7871	0.1127	0.0776	0.1903	0.5858	0.06754	0.04908	0.1166	0.2841	0.009262	0.007053	0.01631	0.2781	0.01809	0.002847	0.02094	0.6602	0.1238	0.03401	0.1578	1.5295	0.8301	0.2447	1.0749	12/8/2011	1/5/2011	M	Y	6	GW	2	638	654	5.4	8.3	11.3	16.2	19.2	20.2	21.6	22.4	24.1	24.9	24.8	25.3
889	0.7951	0.1567	0.1007	0.2574	0.7349	0.07677	0.06269	0.1395	0.5446	0.05795	0.0399	0.09785	0.2598	0.007771	0.005843	0.01361	0.2395	0.01646	0.002082	0.01855	0.5951	0.1022	0.02856	0.1307	1.3633	0.7528	0.2097	0.9625	12/15/2011	1/11/2012	M	Y	6	GW	2	657	658	4.8	7.7		13.2	16.2	16.7	17.7	18.9	19.7	20.6	20.9	22.1
897	0.8018	0.1475	0.09844	0.2459	0.7112	0.07737	0.05692	0.1343	0.5556	0.05127	0.03776	0.08904	0.251	0.006535	0.005873	0.01241	0.2472	0.01265	0.002625	0.01527	0.4679	0.07444	0.02773	0.1022	1.5579	0.795	0.2506	1.0456	12/15/2011	1/11/2012	M	Y	6	GW	2	657	658	4.7	7.6		15.3	19.5	19.8	20.5	21.5	22.1	23.3	23.6	25.4
770	0.5674	0.1	0.05575	0.1558	0.5076	0.04515	0.03363	0.07879	0.4817	0.04464	0.03471	0.07935	0.231	0.006831	0.006266	0.0131	0.2478	0.01532	0.002939	0.01826	0.4534	0.07706	0.02068	0.09775	1.8031	1.0303	0.2882	1.3185	11/7/2011	12/6/2011	F	Y	6	WG	2	626	624	5.5	10.3	13	14.9	15.8	15.5	15.9	14.5	14.4	16.1	15.1	15.9
807	0.6939	0.1263	0.08142	0.2077	0.5806	0.05343	0.04066	0.09409	0.5633	0.05667	0.0377	0.09437	0.2656	0.008368	0.005986	0.01435	0.2304	0.01237	0.001801	0.01417	0.5036	0.08631	0.01807	0.1044	1.7348	0.9797	0.2915	1.2712	11/14/2011	12/8/2011	F	Y	6	GW	2	638	654	4.6	7.8	10.1	12.7	15.4	15.7	15.2	14.4	15.7	16.8	17.3	17.6
815	0.7301	0.1418	0.09688	0.2387	0.6689	0.07356	0.05907	0.1326	0.5336	0.05303	0.03926	0.09229	0.2307	0.006125	0.00458	0.01071	0.2587	0.01633	0.002295	0.01863	0.4436	0.07493	0.01645	0.09138	1.4486	0.7819	0.233	1.0149	11/21/2011	12/15/2011	M	Y	6	GW	2	657	658	4.7	8.4	11.4	14.5	16.3	17.9	18.7	19.9	20.5	21.2	21.2	22
823	0.7757	0.1343	0.08841	0.2227	0.6512	0.06049	0.04879	0.1093	0.5081	0.04126	0.03248	0.07374	0.2674	0.007509	0.006667	0.01418	0.2722	0.01891	0.002512	0.02142	0.4899	0.08724	0.02726	0.1145	1.6623	0.8675	0.2492	1.1167	12/1/2011	12/29/2011	M	Y	6	GW	2	640	655	5	8.3	9.4	11.6	14.1	14.9	15.5	16.7	16.9	17.1	18	18.5
856	0.8306	0.1652	0.09205	0.2573	0.6107	0.05814	0.05498	0.1131	0.5615	0.0563	0.03737	0.09367	0.2764	0.008743	0.008133	0.01688	0.2684	0.01493	0.00331	0.01824	0.6262	0.1024	0.03641	0.1388	1.7883	1.0025	0.2586	1.2611	12/6/2011	1/3/2012	F	Y	6	GW	2	653	663	4.2	8.4	12.2	14.8	19	19.6	20.9	24.6	25.5	27.4	26.4	26.5
890	0.7626	0.133	0.09527	0.2283	0.6926	0.08072	0.06263	0.1434	0.506	0.04902	0.03211	0.08113	0.2512	0.007679	0.005765	0.01344	0.2776	0.01728	0.003131	0.02041	0.5392	0.08077	0.02989	0.1107	1.3945	0.7392	0.227	0.9662	12/15/2011	1/11/2012	M	Y	6	GW	2	657	658	4.1	7.1		11.5	15.9	16.5	17.7	18.8	19.5	19.7	19.4	20.7
898	0.8335	0.1688	0.1224	0.2912	0.707	0.08783	0.06165	0.1495	0.5642	0.06196	0.0434	0.1054	0.2364	0.007511	0.006681	0.01419	0.255	0.01742	0.002154	0.01957	0.5404	0.09384	0.03087	0.1247	1.783	0.9705	0.2975	1.268	12/25/2011	1/21/2012	M	Y	6	GW	2	659	662	4		10.7	13.3	16.9	19.1	20	21.1	21.9	23	23.4	25.3
771	0.6972	0.1257	0.08374	0.2094	0.6013	0.06702	0.046	0.113	0.5441	0.0566	0.04159	0.09819	0.2565	0.009343	0.007431	0.01677	0.2646	0.01853	0.002857	0.02139	0.534	0.09275	0.03044	0.1232	1.5854	0.8778	0.2548	1.1326	11/7/2011	12/6/2011	M	Y	6	WG	2	626	624	6.4	11.4	14	17.7	21.8	21.7	22.9	23	23.3	25.1	23.9	23.3
808	0.5078	0.06339	0.04832	0.1117	0.4528	0.0325	0.01879	0.05128	0.4018	0.02537	0.01953	0.0449	0.2004	0.005585	0.003573	0.009159	0.2004	0.01109	0.001531	0.01262	0.4639	0.0658	0.01759	0.08339	1.3431	0.613	0.2041	0.8171	11/14/2011	12/8/2011	M	Y	6	GW	2	638	654	5	8.4	11.1	12.9	15.1	14.8	14.8	14.9	16.1	16.3	15	15.3
816	0.6597	0.1153	0.07304	0.1883	0.5945	0.05628	0.05049	0.1068	0.4881	0.04599	0.03388	0.07986	0.2528	0.007466	0.006225	0.01369	0.2501	0.01272	0.002686	0.01541	0.5243	0.09215	0.01898	0.1111	1.6925	0.9133	0.273	1.1862	11/21/2011	12/15/2011	F	Y	6	GW	2	657	658	5.7	9.2	11.5	13.1	15.8	16.2	16.8	18.2	17.6	18.7	17.5	17.8
857	0.793	0.1668	0.1106	0.2775	0.6651	0.08536	0.05285	0.1382	0.5938	0.07003	0.04612	0.1161	0.2322	0.007069	0.005644	0.01271	0.2814	0.0207	0.003109	0.02381	0.6686	0.1108	0.03625	0.147	1.8012	0.9845	0.2711	1.2556	12/6/2011	1/3/2012	M	Y	6	GW	2	653	663	5	10.6	14	15.9	17.9	19.4	20.9	21.6	21.9	23.1	22.7	24.6
891	0.6432	0.1089	0.0659	0.1748	0.5776	0.06017	0.03886	0.09903	0.4969	0.04357	0.03688	0.08044	0.2445	0.006952	0.006637	0.01359	0.2836	0.0174	0.004287	0.02168	0.5078	0.08413	0.03142	0.1155	1.5432	0.7687	0.2415	1.0102	12/15/2011	1/11/2012	M	Y	6	GW	2	657	658	4.8	7.7		11.7	15.1	14.9	15.3	16.5	17.7	18.6	18.4	19.7
900	0.7236	0.1335	0.08421	0.2177	0.6425	0.06581	0.05292	0.1187	0.515	0.04505	0.0337	0.07875	0.2495	0.008516	0.00581	0.01433	0.2315	0.01149	0.002279	0.01377	0.4628	0.06461	0.02193	0.08654					12/25/2011	1/21/2012	F	Y	6	GW	2	659	662	4.2		12.5	15.3	17.2	16.8	17.4	18	19.1	19.5	19.9	20.5
772	0.7031	0.1449	0.08669	0.2315	0.6115	0.06954	0.04516	0.1147	0.5726	0.05575	0.04106	0.09681	0.2699	0.009771	0.007724	0.01749	0.279	0.01858	0.002707	0.02129	0.5357	0.1023	0.02316	0.1255	1.5577	0.8633	0.2465	1.1098	11/7/2011	12/6/2011	M	Y	6	WG	2	626	624	5.8	11.6	14.6	18.4	22.8	21.7	22.4	22.6	22.8	24.4	24.1	23.7
802	0.672	0.1241	0.07803	0.2021	0.5839	0.05673	0.04713	0.1039	0.5707	0.05273	0.04007	0.0928	0.2774	0.009659	0.006504	0.01616	0.2888	0.0188	0.003161	0.02196	0.5658	0.09715	0.02318	0.1203	1.5903	0.7986	0.2655	1.0641	11/14/2011	12/8/2011	F	Y	6	GW	2	638	654	4.9	8.2	11.1	12.4	16.2	17.4	16.9	16.5	19.2	20	19.2	19
809	0.6436	0.1167	0.07554	0.1922	0.6006	0.06923	0.04929	0.1185	0.4718	0.04861	0.03341	0.08202	0.2452	0.007951	0.005739	0.01369	0.2286	0.0136	0.002091	0.0157	0.5136	0.08353	0.02283	0.1064					11/14/2011	12/8/2011	M	Y	6	GW	2	638	654	4.9	7.6	10	12.8	16.4	16.7	16.5	16.6	17.5	18.6	18.4	18.7
817	0.6233	0.09927	0.06454	0.1638	0.5684	0.05196	0.03802	0.08998	0.4599	0.0347	0.02465	0.05935	0.233	0.005994	0.004561	0.01056	0.2183	0.008125	0.002166	0.01029	0.4241	0.06661	0.01951	0.08612	1.4785	0.7581	0.2221	0.9801	11/21/2011	12/15/2011	M	Y	6	GW	2	657	658	5.1	8.2	10.7	14	14.8	16.2	17	18.8	20.1	19.6	20	21.2
873	0.7903	0.1703	0.09785	0.2681	0.7261	0.1057	0.06277	0.1685	0.5902	0.05921	0.04092	0.1001	0.2791	0.009901	0.007104	0.01701	0.2781	0.02021	0.002818	0.02303	0.5977	0.09564	0.03304	0.1287	1.6138	0.9342	0.2635	1.1977	12/8/2011	1/5/2011	M	Y	6	GW	2	638	654	5.5	7.9	12.5	19.3	22.3	22.7	22.3	23.3	23.6	25.5	24.6	25.8
881	0.7869	0.1449	0.09778	0.2427	0.6825	0.08617	0.05416	0.1403	0.5156	0.04861	0.034	0.08261	0.2442	0.006618	0.005718	0.01234	0.2604	0.01595	0.002421	0.01837	0.4436	0.07077	0.02228	0.09305	1.4732	0.8328	0.2421	1.0748	12/8/2011	1/5/2011	M	Y	6	GW	2	638	654	4.4	6.5	9.1	11.3	15.1	15.2	15.7	16.6	17.5	18.5	18.8	20.2
892	0.6866	0.1132	0.06852	0.1817	0.6184	0.05067	0.04141	0.09208	0.4956	0.03841	0.02997	0.06839	0.2481	0.007159	0.004045	0.0112	0.2471	0.01605	0.001988	0.01804	0.4552	0.07114	0.01597	0.08711	1.4919	0.8108	0.2022	1.013	12/15/2011	1/11/2012	F	Y	6	GW	2	657	658	4.4	7.3		11.1	12.4	13.5	14.6	15.5	15.7	15.5	15.4	16.5
901	0.7256	0.1281	0.08419	0.2123	0.6118	0.05524	0.04708	0.1023	0.4731	0.0425	0.02818	0.07068	0.2491	0.006894	0.004923	0.01182	0.2465	0.01333	0.002375	0.01571	0.5121	0.07581	0.02121	0.09701	1.6803	0.9047	0.2643	1.169	12/25/2011	1/21/2012	F	Y	6	GW	2	659	662	4.3		11.5	14.1	16.8	17.4	18.3	19.1	20.5	21.3	21	21.6
909	0.7156	0.1316	0.07524	0.2068	0.629	0.0568	0.04831	0.1051	0.5428	0.0475	0.0387	0.0862	0.2451	0.006918	0.006175	0.01309	0.2461	0.01207	0.002759	0.01483	0.4519	0.0759	0.02854	0.1044	1.7259	0.9096	0.2874	1.197	12/28/2011	1/22/2012	M	Y	6	WG	2	626	624	5.9		12	14.1	15.2	16.3	17.8	17.9	19.3	19.9	20.7	20
917	0.7607	0.136	0.08996	0.226	0.6286	0.0675	0.04611	0.1136	0.5744	0.06015	0.04475	0.1049	0.2709	0.007341	0.006826	0.01417	0.2632	0.01548	0.002338	0.01782	0.5052	0.09338	0.02904	0.1224	1.4406	0.759	0.2184	0.9773	12/28/2011	1/25/2012	M	Y	6	GW	2	637	645	4.4	7.3	8.7	10.6	15	15.5	16.9	16.1	18.1	18.8	19.3	19.8
925	0.614	0.0874	0.06257	0.15	0.5327	0.04503	0.03856	0.08359	0.4799	0.03906	0.02897	0.06803	0.2313	0.006953	0.004622	0.01158	0.2583	0.01422	0.002472	0.0167	0.4052	0.0581	0.01814	0.07624	1.5186	0.7507	0.2244	0.9752	12/30/2011	1/26/2012	F	Y	6	GW	2	644	663	5.1	8.1	9.1	11	12.1	12.9	12.8	13.4	13.2	13.2	13.7	14.2
932	0.895	0.1993	0.1245	0.3239	0.7753	0.1003	0.06657	0.1669	0.658	0.0757	0.03885	0.1145	0.2969	0.009762	0.008257	0.01802	0.2531	0.01672	0.001838	0.01855	0.616	0.09948	0.0328	0.1323	1.7463	1.0601	0.2547	1.3148	12/31/2011	1/24/2012	M	Y	6	GW	2	642	661	6.8	11	12.3	16.7	20.1	21.8	24.4	26.2	26.7	28.6	28.3	29.6
940	0.7111	0.1436	0.09774	0.2413	0.6335	0.06583	0.05113	0.117	0.5218	0.0524	0.0388	0.09119	0.2703	0.008992	0.006921	0.01591	0.2717	0.01874	0.002379	0.02112	0.4629	0.08181	0.02176	0.1036	1.732	1.03	0.2734	1.3034	1/11/2012	2/8/2012	F	Y	6	GW	2	657	658	5.1		10.9	13.4	16.4	16.2	16.6	17.1	17.3	18.9	18.6	19
955	0.6699	0.1094	0.06677	0.1762	0.5562	0.0511	0.04155	0.09265	0.5195	0.04989	0.03413	0.08402	0.2732	0.00892	0.00667	0.01559	0.2645	0.01334	0.002597	0.01594	0.504	0.08162	0.02743	0.1091	1.6529	0.8232	0.2808	1.104	1/22/2012	2/19/2012	F	Y	6	WG	2	626	624	5.1	7.5	10.5	12.3	16	16.4	16.2	16.2	16.2	15.5	16.2	17.1
963	0.7056	0.1217	0.08005	0.2018	0.6063	0.0536	0.04549	0.09909	0.5263	0.04223	0.0331	0.07533	0.2669	0.007019	0.006205	0.01322	0.2486	0.01197	0.002415	0.01439	0.5674	0.09774	0.02242	0.1202	1.5847	0.8379	0.2245	1.0624	1/24/2012	2/21/2012	F	Y	6	GW	2	642	661	4.5	7.5	10.9	13	14.5	14.5	14.5	15.7	18	17.7	17.3	18.6
971	0.6575	0.1109	0.07167	0.1826	0.5492	0.04279	0.04039	0.08318	0.5069	0.04355	0.03002	0.07358	0.185	0.004	0.003	0.007	0.203	0.009	0.002	0.011	0.635	0.1214	0.03353	0.1549	1.683	0.905	0.2462	1.1512	1/26/2012	2/23/2012	F	Y	6	GW	2	644	663	4.5	7.3	9.7	11.6	12.6	13.2	13.1	12.7	14	14.9	14.4	14.7
982	0.9164	0.1978	0.1355	0.3333	0.8161	0.11815	0.07605	0.1912	0.5859	0.06068	0.04006	0.1007	0.2839	0.00954	0.007634	0.01717	0.276	0.01746	0.002389	0.01985	0.5565	0.1059	0.0244	0.1303	1.6345	0.8321	0.2613	1.0935	2/14/2012	3/13/2012	M	Y	6	GW	2	659	662	4.7	8.6	10.4	14.4	18.6	19.7	21.3	22.1	22.6	23.8	23.6	24.2
902	0.7246	0.1212	0.08331	0.2045	0.6883	0.06579	0.04843	0.1142	0.5155	0.04088	0.02825	0.06913	0.2516	0.006582	0.005844	0.01243	0.2217	0.01001	0.001802	0.01181	0.4862	0.06954	0.02498	0.09452	1.7346	0.8755	0.2893	1.1648	12/25/2011	1/21/2012	F	Y	6	GW	2	659	662	4		11.2	13.3	14.4	15	16	17.4	18.4	18.5	19	19.5
910	0.628	0.1182	0.07047	0.1886	0.5843	0.0627	0.04309	0.1058	0.4916	0.0471	0.03173	0.07883	0.2656	0.0104	0.007222	0.01763	0.3101	0.02126	0.004851	0.02611	0.542	0.08397	0.02798	0.1119	1.5205	0.8403	0.2691	1.1094	12/28/2011	1/22/2012	M	Y	6	WG	2	626	624	6		12.5	16.3	18.8	19.3	20.1	21	22.3	23.5	23.9	23.9
918	0.6983	0.124	0.07986	0.2038	0.6255	0.07272	0.041	0.1137	0.5267	0.04696	0.03343	0.0804	0.2667	0.007874	0.006652	0.01453	0.2465	0.01702	0.001925	0.01895	0.4303	0.07107	0.01797	0.08904	1.2508	0.6521	0.1845	0.8366	12/28/2011	1/25/2012	M	Y	6	GW	2	637	645	4.2	6.4	8.8	11.4	15.6	16	17.3	17.7	18.7	20.8	21.1	22
926	0.6068	0.09906	0.06123	0.1603	0.553	0.05907	0.04479	0.1039	0.4815	0.04627	0.03227	0.07854	0.2499	0.008165	0.006716	0.01488	0.2409	0.01281	0.002927	0.01574	0.4833	0.0705	0.02671	0.09721	1.4308	0.7402	0.2235	0.9637	12/30/2011	1/26/2012	F	Y	6	GW	2	644	663	5.3	8.6	10	11.4	12.2	13.2	13.5	13.6	15.2	16.7	16.4	15.8
933	0.6306	0.1043	0.06936	0.1737	0.6208	0.06683	0.04924	0.1161	0.5707	0.05425	0.03739	0.09163	0.2876	0.009292	0.007275	0.01657	0.2839	0.0179	0.003503	0.0214	0.5445	0.08243	0.02635	0.1088	1.5497	0.7768	0.228	1.0047	12/31/2011	1/24/2012	F	Y	6	GW	2	642	661	7.3	11.4	13	16.3	18.3	18	18.9	19.8	20.8	20.2	21	21.5
948	0.6709	0.1008	0.07362	0.1744	0.5936	0.05166	0.04612	0.09778	0.5085	0.04264	0.0312	0.07385	0.2381	0.00708	0.004809	0.01189	0.2314	0.0107	0.00265	0.01335	0.4446	0.05632	0.02287	0.07919	1.3884	0.6526	0.2021	0.8547	1/17/2012	2/14/2012	F	Y	6	GW	2	640	655	4.3		9	10.7	12	12.7	12.4	12.7	13.4	14.8	14.8	16
956	0.7403	0.1498	0.08249	0.2323	0.6158	0.06083	0.04711	0.1079	0.5745	0.05156	0.04178	0.09334	0.2554	0.009667	0.005537	0.0152	0.2316	0.01248	0.002305	0.01479	0.4854	0.0729	0.02619	0.0991	1.5967	0.8577	0.2403	1.098	1/22/2012	2/19/2012	F	Y	6	WG	2	626	624	4.8	7.1	9.4	11.7	15.8	16.8	16.4	16.5	18.2	18.4	18.6	20.6
964	0.7546	0.1613	0.09473	0.256	0.6627	0.08328	0.05787	0.1412	0.5533	0.06353	0.05105	0.1146	0.2625	0.009943	0.006216	0.01616	0.2764	0.02043	0.002811	0.02324	0.5071	0.08969	0.02173	0.1114	1.5031	0.8651	0.2409	1.1059	1/24/2012	2/21/2012	M	Y	6	GW	2	642	661	4.8	8	11.9	16.5	18.5	18.7	19.8	19.2	19.8	21.4	20.8	21.3
983	0.7237	0.1404	0.09207	0.2325	0.6048	0.07344	0.05057	0.124	0.5361	0.0456	0.03476	0.08036	0.2499	0.007651	0.005906	0.01356	0.2661	0.01608	0.002291	0.01837	0.4942	0.08192	0.02257	0.1045	1.3239	0.6844	0.2054	0.8898	2/14/2012	3/13/2012	M	Y	6	GW	2	659	662	4.2	7.6	9.3	13.3	15	15.8	17.3	17.7	18.7	19.6	19.9	21.1
903	0.8714	0.2068	0.1278	0.3346	0.7426	0.0867	0.06673	0.1534	0.5875	0.06857	0.04368	0.1122	0.2725	0.008103	0.006414	0.01452	0.304	0.01787	0.004681	0.02255	0.5484	0.09016	0.02119	0.1114	1.5892	0.8233	0.2618	1.0851	12/25/2011	1/21/2012	M	Y	6	GW	2	659	662	4		10.5	12	14.7	16.1	17.4	18.4	20	21.3	21	21.2
911	0.6626	0.1098	0.07174	0.1815	0.6072	0.06446	0.04642	0.1109	0.4942	0.04414	0.03331	0.07745	0.2602	0.007909	0.005846	0.01375	0.2666	0.01536	0.002722	0.01808	0.4838	0.08111	0.02197	0.1031	1.4625	0.7896	0.2296	1.0192	12/28/2011	1/25/2012	M	Y	6	GW	2	637	645	4.4	7.8	10.2	14.3	17.7	17.6	17.7	17.8	19.1	20.4	20.3	19.6
919	0.6952	0.1233	0.08152	0.2048	0.6657	0.06088	0.05058	0.1115	0.5094	0.04167	0.03411	0.07578	0.2507	0.007132	0.005382	0.01251	0.2396	0.01304	0.001972	0.01501	0.5219	0.07576	0.02566	0.1014	1.7733	1.1672	0.268	1.4352	12/28/2011	1/25/2012	F	Y	6	GW	2	637	645	4.7	7.7	9.9	12	14.9	15.4	16	16.5	17.8	18.4	17.9	17.9
934	0.7587	0.1403	0.08638	0.2267	0.6659	0.06942	0.0527	0.1221	0.5513	0.04834	0.03781	0.08615	0.2488	0.006934	0.005169	0.0121	0.2653	0.01554	0.002776	0.01831	0.4795	0.07935	0.02439	0.1037	1.5163	0.7216	0.2392	0.9608	1/11/2012	2/8/2012	M	Y	6	GW	2	657	658	4.7		10.3	14.1	19.5	19.3	19.7	21.1	21.5	22.8	23.5	23.4
941	0.6379	0.107	0.07448	0.1815	0.5373	0.05384	0.03783	0.09167	0.4801	0.0462	0.0306	0.07681	0.2398	0.007465	0.005814	0.01328	0.2813	0.01958	0.003006	0.02259	0.4372	0.07612	0.02202	0.09814					1/11/2012	2/8/2012	M	Y	6	GW	2	657	658	5.2		10.1	11.5	15.2	16	16.5	18.5	18.9	19.4	20.7	20.7
949	0.7401	0.1418	0.09199	0.2338	0.6162	0.05728	0.04975	0.107	0.5876	0.06968	0.04081	0.1105	0.2576	0.01012	0.005671	0.01579	0.2413	0.01251	0.002245	0.01475	0.4024	0.06793	0.02035	0.08828	1.6968	0.8736	0.2883	1.162	1/22/2012	2/19/2012	F	Y	6	WG	2	626	624	4.6	6.8	8.8	11.4	16.1	15.4	15.8	16.6	17.9	17.1	18	19.9
957	0.8104	0.1626	0.1016	0.2642	0.6899	0.08177	0.05857	0.1403	0.6369	0.06628	0.05334	0.1196	0.2737	0.009385	0.008674	0.01806	0.2647	0.01753	0.002833	0.02036	0.646	0.1086	0.02917	0.1378	1.8334	1.0481	0.3001	1.3482	1/22/2012	2/19/2012	F	Y	6	WG	2	626	624	4.8	7.2	9.9	12.8	16.5	16.3	16.2	17.5	18.8	19.2	19.6	21.7
904	0.7345	0.1227	0.07567	0.1983	0.676	0.06692	0.05397	0.1209	0.5557	0.04436	0.03288	0.07723	0.2419	0.006633	0.004676	0.01131	0.2268	0.01115	0.00189	0.01304	0.513	0.08723	0.02332	0.1106	1.5959	0.7432	0.2395	0.9828	12/28/2011	1/22/2012	M	Y	6	WG	2	626	624	5.8		11.2	14.3	16.3	16.4	17.2	17.3	19.5	19.3	20	20
912	0.6433	0.1001	0.07546	0.1755	0.5617	0.04394	0.03806	0.082	0.5049	0.03955	0.03169	0.07123	0.2188	0.005869	0.004219	0.01009	0.1937	0.006918	0.001622	0.00854	0.4306	0.05444	0.01769	0.07213	1.5881	0.7205	0.2132	0.9336	12/28/2011	1/25/2012	F	Y	6	GW	2	637	645	3.8	6.7	8.4	10.2	13.8	13.3	13.7	13	14.1	14.9	15.1	15.6
920	0.683	0.1278	0.07926	0.2071	0.5959	0.05986	0.04392	0.1038	0.5273	0.04941	0.03736	0.08677	0.2813	0.00818	0.00661	0.01479	0.2587	0.01773	0.002067	0.0198	0.4527	0.06984	0.02147	0.0913	1.4225	0.6462	0.238	0.8842	12/28/2011	1/25/2012	M	Y	6	GW	2	637	645	3.9	7.2	9.3	12.9	16.3	16.7	18.2	17.3	18.4	20.2	20.7	20.8
927	0.7185	0.1304	0.09035	0.2208	0.5873	0.05614	0.04485	0.101	0.4949	0.04402	0.03117	0.0752	0.2285	0.006008	0.005577	0.01158	0.2734	0.01485	0.003052	0.01791	0.6352	0.08662	0.02421	0.1108	1.5721	0.9136	0.2256	1.1392	12/30/2011	1/26/2012	M	Y	6	GW	2	644	663	5.1	8.4	9.3	12.2	17.5	17.6	17.8	18.4	19.5	20.6	21.1	21.7
935	0.6568	0.1151	0.07299	0.1881	0.6234	0.06541	0.05187	0.1173	0.4712	0.04104	0.02887	0.0699	0.2587	0.008952	0.006264	0.01522	0.2671	0.01608	0.002696	0.01878	0.4713	0.07748	0.02188	0.09936	1.6636	0.88	0.2719	1.152	1/11/2012	2/8/2012	F	Y	6	GW	2	657	658	5.1		11.1	13.8	16.2	15.5	16.1	16.5	17.7	17.4	17.5	17.7
942	0.7048	0.1301	0.07889	0.209	0.5794	0.05132	0.04452	0.09584	0.5663	0.05174	0.03526	0.087	0.2812	0.008572	0.006198	0.01477	0.2667	0.01173	0.002955	0.01468	0.6047	0.09317	0.02499	0.1182	1.7446	0.8476	0.2819	1.1295	1/17/2012	2/14/2012	F	Y	6	GW	2	640	655	4.1		10.4	12.9	15.9	15.9	16.4	15.8	15.8	16.9	16.9	17.7
950	0.6851	0.145	0.07498	0.22	0.5848	0.05568	0.04587	0.1016	0.5589	0.05711	0.0465	0.1036	0.2529	0.009512	0.00647	0.01598	0.2711	0.01481	0.003295	0.0181	0.5041	0.08528	0.0276	0.1129	1.6511	0.9904	0.2529	1.2434	1/22/2012	2/19/2012	F	Y	6	WG	2	626	624	5.2	8	10.8	13.6	16	16.4	17.1	18.2	19.3	19.6	20.6	20.7
958	0.6799	0.11	0.07219	0.1822	0.5401	0.04414	0.03658	0.08072	0.5288	0.04398	0.03351	0.0775	0.2495	0.007006	0.006067	0.01307	0.2259	0.01066	0.002102	0.01276	0.5309	0.07935	0.01994	0.0993	1.5593	0.7563	0.2472	1.0035	1/24/2012	2/21/2012	F	Y	6	GW	2	642	661	4.1	7	9.4	12.5	15	14.8	13.9	15.3	16.9	18	17.3	18.7
966	0.7486	0.1359	0.07928	0.2152	0.664	0.07522	0.04771	0.1229	0.5784	0.05622	0.04033	0.09655	0.2808	0.008836	0.00717	0.01601	0.2494	0.01395	0.002272	0.01622	0.5465	0.08137	0.02294	0.1043	1.5561	0.8252	0.2351	1.0603	1/24/2012	2/21/2012	M	Y	6	GW	2	642	661	4.3	7.1	10.6	14.7	17	16.9	17.7	18.4	18.9	20.2	19.5	21.4
993	0.6343	0.1094	0.06368	0.1731	0.5941	0.06046	0.04313	0.1036	0.5206	0.04983	0.03242	0.08225	0.2444	0.008325	0.007559	0.01588	0.242	0.01478	0.003174	0.01795	0.5467	0.08959	0.02455	0.1141	1.7255	0.9623	0.302	1.2643	2/22/2012	3/21/2012	F	Y	6	WG	2	668	739	5.1	9.2	11.6	13.7	16.2	15.8	15.9	16.4	17.3	18.2	18.1	17.3
913	0.7756	0.1387	0.1015	0.2402	0.6863	0.07487	0.05738	0.1323	0.5831	0.06128	0.04146	0.1027	0.2761	0.008235	0.007766	0.016	0.2814	0.01528	0.003721	0.019	0.5715	0.09947	0.02943	0.1289	1.5046	0.8519	0.2423	1.0942	12/28/2011	1/25/2012	M	Y	6	GW	2	637	645	4.4	7.7	10.6	15.7	19.9	20.9	21.2	21	21.6	22.9	22.9	23.7
921	0.6624	0.118	0.09019	0.2082	0.5717	0.04977	0.04436	0.09413	0.5292	0.05567	0.0368	0.09247	0.2477	0.008515	0.005475	0.01399	0.2488	0.01459	0.002318	0.01691	0.4537	0.07258	0.02048	0.09306	1.5944	0.8974	0.2518	1.1492	12/30/2011	1/26/2012	F	Y	6	GW	2	644	663	5.1	8.4	9.8	10.9	13.1	13.9	14	15.6	15.1	15.8	15.6	16.4
928	0.6122	0.09999	0.06033	0.1603	0.5596	0.05077	0.04305	0.09381	0.4521	0.03438	0.02673	0.06111	0.2375	0.006865	0.005458	0.01232	0.2279	0.01256	0.00202	0.01458	0.3766	0.05329	0.01849	0.07178	1.5683	0.8127	0.2347	1.0473	12/30/2011	1/26/2012	F	Y	6	GW	2	644	663	5.1	8.5	9.5	11.6	13.8	13.7	13.4	13.9	15.8	16	16.4	16.7
936	0.6894	0.1081	0.07442	0.1826	0.6042	0.05129	0.04213	0.09342	0.5162	0.0412	0.03556	0.07676	0.2273	0.006147	0.004504	0.01065	0.2107	0.01046	0.001503	0.01196	0.491	0.06078	0.02442	0.08521	1.8716	1.0617	0.2681	1.3298	1/11/2012	2/8/2012	F	Y	6	GW	2	657	658	4.2		10	11.7	13.9	14.5	16	16.8	17	16.4	16.7	17.5
943	0.7179	0.1452	0.07361	0.2188	0.5992	0.06451	0.04195	0.1065	0.5031	0.0459	0.03009	0.07599	0.261	0.008932	0.00662	0.01555	0.26	0.01334	0.002854	0.0162	0.4252	0.07396	0.01764	0.09161	1.5587	0.8109	0.2355	1.0465	1/17/2012	2/14/2012	M	Y	6	GW	2	640	655	4		10	13.8	16.2	17.2	17.6	17.8	17.7	18.4	18.5	18.5
951	0.8042	0.1582	0.08322	0.2414	0.6224	0.0536	0.04272	0.09632	0.571	0.05911	0.04129	0.1004	0.2538	0.006901	0.006293	0.01319	0.2233	0.008628	0.002095	0.01072	0.5118	0.08341	0.02392	0.1073	1.7653	0.9931	0.2564	1.2495	1/22/2012	2/19/2012	F	Y	6	WG	2	626	624	5	7	10	12.9	16.7	16.5	16.7	16.5	17.2	16	17.4	19
959	0.7324	0.138	0.1008	0.2388	0.6351	0.06827	0.04904	0.1173	0.5598	0.0582	0.03781	0.09601	0.2766	0.009006	0.00684	0.01585	0.2562	0.01398	0.002728	0.01671	0.5146	0.08561	0.02536	0.111	1.5424	0.7825	0.2573	1.0397	1/24/2012	2/21/2012	M	Y	6	GW	2	642	661	4.6	7.2	10.9	16	18	17.6	20	19.9	20.5	21.4	22	23.4
967	0.7444	0.1426	0.08521	0.2278	0.6581	0.07647	0.05149	0.128	0.5188	0.04397	0.03543	0.0794	0.2532	0.007324	0.006016	0.01334	0.2441	0.0139	0.002025	0.01592	0.4971	0.0769	0.03088	0.1078	1.4377	0.714	0.2111	0.9251	1/24/2012	2/21/2012	M	Y	6	GW	2	642	661	4.5	7.6	10.8	14	17.7	17.7	19.3	20.1	20.9	22.3	22.4	24.7
986	0.7552	0.1409	0.08855	0.2294	0.6424	0.06356	0.05401	0.1176	0.7111	0.08438	0.064635	0.14735	0.2875	0.01112	0.006375	0.0175	0.2793	0.01904	0.002544	0.02159	0.5811	0.08948	0.02027	0.1097	1.7032	0.9315	0.2712	1.2027	2/14/2012	3/13/2012	F	Y	6	GW	2	659	662	4.8	8.9	10.5	13.3	16.4	17.3	18.9	18.8	20.2	20.6	19.6	20.2
994	0.8068	0.1652	0.09417	0.2593	0.7033	0.07709	0.05835	0.1354	0.6149	0.06548	0.04628	0.1118	0.2763	0.008955	0.007069	0.01602	0.3054	0.01824	0.004073	0.02232	0.5581	0.08611	0.02732	0.1134	1.6615	0.9303	0.2808	1.2111	2/22/2012	3/21/2012	F	Y	6	WG	2	668	739	3.9	7.7	10	12.8	14.6	15.1	16.2	17.3	18.5	19.8	19.5	19.2
906	0.6583	0.1023	0.06034	0.1626	0.6086	0.06445	0.04956	0.114	0.5529	0.04591	0.03878	0.08469	0.2631	0.007444	0.005916	0.01336	0.2769	0.01463	0.003922	0.01856	0.5378	0.0988	0.03086	0.1297	1.5986	0.8175	0.2359	1.0534	12/28/2011	1/22/2012	M	Y	6	GW	2	626	624	6.3		12.9	15.5	16.8	16.6	17.7	17.6	19.6	20.8	20.7	20.2
914	0.7979	0.1686	0.118	0.2866	0.6728	0.08916	0.06438	0.1535	0.6186	0.07425	0.05335	0.1276	0.2754	0.009989	0.007946	0.01794	0.3083	0.02394	0.003301	0.02724	0.5608	0.1121	0.03218	0.1443	1.494	0.8355	0.2442	1.0797	12/28/2011	1/25/2012	M	Y	6	GW	2	637	645	4.8	8.2	10.5	14.7	18.8	19.2	20.4	20.6	22.1	23.7	23.6	23.6
922	0.634	0.1021	0.06871	0.1708	0.5307	0.04306	0.03376	0.07682	0.521	0.04523	0.03503	0.08026	0.2704	0.008654	0.00602	0.01467	0.2768	0.01548	0.002817	0.0183	0.5556	0.07376	0.02885	0.1026	1.6718	0.849	0.262	1.111	12/30/2011	1/26/2012	F	Y	6	GW	2	644	663	5	8.4	9.4	11.8	14.4	15.6	14.9	15.9	16.3	17.3	17.1	17.3
937	0.7506	0.1423	0.09367	0.236	0.6938	0.08177	0.05634	0.1381	0.5901	0.06509	0.04019	0.1053	0.2456	0.00711	0.005345	0.01245	0.2578	0.01599	0.002666	0.01865	0.5895	0.09806	0.02469	0.1228	1.3893	0.726	0.2114	0.9374	1/11/2012	2/8/2012	M	Y	6	GW	2	657	658	5.3		10.5	15.7	21.3	21	22.9	23.1	23.8	24.7	25.9	26.8
944	0.697	0.1373	0.08745	0.2248	0.6094	0.07124	0.04185	0.1131	0.5715	0.05856	0.04679	0.1053	0.2507	0.007805	0.006155	0.01396	0.2621	0.01438	0.003107	0.01749	0.5005	0.08882	0.02153	0.1103	1.6708	0.9995	0.2675	1.267	1/17/2012	2/14/2012	M	Y	6	GW	2	640	655	4.6		10.9	15.1	19.3	19.5	19.6	22	22.3	23.9	24	24
952	0.6816	0.1271	0.06976	0.1969	0.5755	0.05857	0.04355	0.1021	0.499	0.04395	0.03837	0.08232	0.2412	0.006951	0.006251	0.0132	0.2324	0.01267	0.002206	0.01488	0.5459	0.08604	0.02191	0.108	1.3789	0.7744	0.2186	0.993	1/22/2012	2/19/2012	M	Y	6	WG	2	626	624	4.9	6.9	10.4	13.2	17.8	18.1	17.9	18.2	19.5	20.6	20.7	21.2
960	0.7075	0.1197	0.08495	0.2047	0.6617	0.07678	0.05168	0.1285	0.5455	0.05345	0.03934	0.09279	0.2634	0.00774	0.006225	0.01397	0.2447	0.01514	0.002572	0.01771	0.4261	0.07226	0.01894	0.0912	1.5216	0.7423	0.2317	0.974	1/24/2012	2/21/2012	M	Y	6	GW	2	642	661	4.5	7.4	10.8	15.6	17.1	17	17.4	17.6	18.6	19.8	19.7	21
968	0.7775	0.1474	0.0926	0.24	0.6603	0.06659	0.04898	0.1156	0.6212	0.0637	0.0432	0.1069	0.2932	0.00913	0.007473	0.0166	0.2476	0.01373	0.002162	0.0159	0.5326	0.08532	0.02619	0.1115	1.7103	0.9003	0.2692	1.1695	1/26/2012	2/23/2012	F	Y	6	GW	2	644	663	5.3	8.5	10.7	13.3	16.4	17.4	18.4	17.8	18.8	19.3	19.4	20.4
976	0.7903	0.1499	0.106	0.2559	0.7054	0.07967	0.06109	0.1408	0.5822	0.05678	0.03506	0.09184	0.2822	0.009962	0.006049	0.01601	0.2368	0.01104	0.002253	0.0133	0.579	0.08513	0.02028	0.1054	1.7572	0.9754	0.2863	1.2617	1/26/2012	2/23/2012	F	Y	6	GW	2	644	663	5.4	8.4	11.1	13.6	16.5	17.1	16.7	18.3	19.4	20.5	20.8	21.9
995	0.7155	0.1459	0.08402	0.23	0.5752	0.05424	0.04277	0.09701	0.5428	0.05273	0.0411	0.09383	0.247	0.009098	0.004581	0.01368	0.2452	0.01385	0.002391	0.01624	0.4378	0.07421	0.02431	0.09852	1.6625	0.8396	0.2695	1.1091	2/22/2012	3/21/2012	F	Y	6	WG	2	668	739	5	9	11.1	12.3	15.3	16.1	17	17.1	17.6	18.4	18.2	18.3
907	0.7372	0.1351	0.08561	0.2207	0.6859	0.06679	0.05619	0.123	0.5422	0.04666	0.03823	0.08489	0.2665	0.007022	0.005881	0.0129	0.2679	0.01597	0.002406	0.01837	0.5043	0.09162	0.02849	0.1201	1.8299	1.0112	0.2816	1.2928	12/28/2011	1/22/2012	F	Y	6	WG	2	626	624	6.1		12.8	15.8	18	17.8	18.6	18.8	20.2	21.5	22.1	22.3
915	0.8535	0.1833	0.1159	0.2992	0.707	0.0937	0.06262	0.1563	0.5459	0.05654	0.03874	0.09529	0.2616	0.008352	0.006947	0.0153	0.2303	0.01328	0.001748	0.01503	0.4972	0.08655	0.01972	0.1063	1.4615	0.7459	0.226	0.9719	12/28/2011	1/25/2012	M	Y	6	GW	2	637	645	4.3	7.5	9.4	12.6	17.8	19	20.1	20	21	22.4	21.9	22
923	0.6433	0.09578	0.06188	0.1577	0.5954	0.05484	0.04263	0.09747	0.5115	0.04202	0.0304	0.07242	0.2572	0.007002	0.005459	0.01246	0.2052	0.009702	0.001469	0.01117	0.5136	0.0628	0.02085	0.08365	1.7741	0.9033	0.2648	1.1681	12/30/2011	1/26/2012	F	Y	6	GW	2	644	663	4.8	8.1	9	10.4	12	13.5	13.1	15	15.4	15.9	15.8	16.1
930	0.8482	0.1797	0.1314	0.3111	0.7295	0.08259	0.06401	0.1466	0.6113	0.06733	0.04784	0.1152	0.3123	0.01131	0.009254	0.02056	0.249	0.01181	0.002784	0.0146	0.5894	0.1043	0.02655	0.1309	1.7443	0.9989	0.2797	1.2786	12/31/2011	1/24/2012	F	Y	6	GW	2	642	661	7.3	11.2	13.9	17.2	19.4	20.1	21.4	22.3	23.9	23.7	24.8	26.1
938	0.7189	0.148	0.09411	0.2422	0.6285	0.07554	0.05341	0.129	0.5601	0.05973	0.04989	0.1096	0.2749	0.01125	0.006789	0.01804	0.3003	0.02012	0.004368	0.02449	0.6129	0.108	0.03929	0.1473	1.553	0.9553	0.255	1.2103	1/11/2012	2/8/2012	M	Y	6	GW	2	657	658	5.1		10.6	15.3	20.3	19.1	20.3	22	22.5	22.8	23.9	24.4
945	0.7793	0.1819	0.08874	0.2706	0.6935	0.08982	0.05071	0.1405	0.6189	0.05926	0.04518	0.1044	0.2883	0.009875	0.00705	0.01692	0.2861	0.0159	0.004499	0.0204	0.6118	0.1172	0.02546	0.1427	1.3215	0.8923	0.2112	1.1035	1/17/2012	2/14/2012	M	Y	6	GW	2	640	655	4.4		11.1	17.2	20	19.9	20.8	21.2	21.8	22.7	22.5	21.8
953	0.6758	0.1094	0.0626	0.172	0.5742	0.04836	0.03904	0.0874	0.5167	0.04452	0.03411	0.07863	0.2675	0.008498	0.0059	0.0144	0.2432	0.0108	0.002954	0.01376	0.471	0.07268	0.02447	0.09715	1.7942	0.847	0.2628	1.1097	1/22/2012	2/19/2012	F	Y	6	WG	2	626	624	5.2	7.5	10.2	12.7	14.6	14.3	15.3	16.1	16.6	15.7	16.5	18.7
961	0.6494	0.1031	0.06662	0.1697	0.5499	0.05262	0.03651	0.08913					0.2575	0.008307	0.005429	0.01374	0.2565	0.01503	0.002217	0.01725	0.517	0.08018	0.02192	0.1021	1.5994	0.8608	0.209	1.0698	1/24/2012	2/21/2012	M	Y	6	GW	2	642	661	4.6	7.6	10.3	12.8	15.7	15.9	16.5	17.2	18.1	18.8	18.5	19.5
980	0.8258	0.1586	0.08836	0.247	0.6939	0.06751	0.05134	0.1189	0.5698	0.05196	0.03768	0.08964	0.3044	0.01138	0.006865	0.01825	0.2913	0.01656	0.003243	0.01981	0.6195	0.0934	0.02386	0.1173	1.823	0.9659	0.3088	1.2747	2/14/2012	3/13/2012	F	Y	6	GW	2	659	662	4.8	8.8	11.4	15	19.2	19	20.2	21	23	23.4	22.5	23.3
996	0.7284	0.1318	0.07406	0.2059	0.59	0.04984	0.04453	0.09436	0.5064	0.04353	0.02842	0.07195	0.2483	0.006634	0.005854	0.01249	0.2412	0.01212	0.002631	0.01475	0.5139	0.08273	0.01825	0.101	1.4266	0.6885	0.225	0.9135	2/22/2012	3/21/2012	F	Y	6	WG	2	668	739	4.9	8.7	10.6	12.5	15.2	14.5	15.4	16	16.6	17.8	18.6	18.3
908	0.7059	0.1186	0.0668	0.1854	0.616	0.04514	0.04356	0.0887	0.5339	0.04247	0.03486	0.07733	0.2613	0.008136	0.00539	0.01353	0.2032	0.01096	0.001413	0.01237	0.5236	0.07954	0.01982	0.09936	1.5691	0.83	0.258	1.088	12/28/2011	1/22/2012	F	Y	6	WG	2	626	624	6.1		11.1	12.7	14.7	15.7	15.8	16.6	17.8	18.9	18.3	19.3
916	0.8055	0.1467	0.0972	0.2439	0.7061	0.08778	0.06168	0.1495	0.5468	0.0543	0.0369	0.0912	0.2846	0.008452	0.007507	0.01596	0.2793	0.01621	0.00284	0.01905	0.5951	0.09995	0.02746	0.1274	1.5337	0.7957	0.2549	1.0505	12/28/2011	1/25/2012	M	Y	6	GW	2	637	645	4.8	8.2	10.6	15.7	21	20.5	21.1	20.8	21.4	23	21.8	22.6
924	0.8926	0.201	0.1204	0.3215	0.7416	0.08914	0.06241	0.1515	0.5619	0.05738	0.03541	0.0928	0.2676	0.00925	0.006308	0.01556	0.2344	0.01238	0.002248	0.01463	0.4839	0.08885	0.02246	0.1113	1.5451	0.8281	0.2164	1.0445	12/30/2011	1/26/2012	M	Y	6	GW	2	644	663	5.1	8.6	9.7	12.4	17.5	19	19.4	20.6	21.8	22.8	22	22.4
931	0.7976	0.1434	0.09494	0.2383	0.6506	0.08329	0.04216	0.1254	0.5956	0.05819	0.04809	0.1063	0.2859	0.008952	0.007833	0.01678	0.3061	0.01898	0.005029	0.024	0.5815	0.1111	0.03071	0.1418	1.58	0.837	0.2543	1.0913	12/31/2011	1/24/2012	M	Y	6	GW	2	642	661	7.6	11.9	12.4	15.4	17.6	18.7	20.2	21.4	23	23.6	23.2	23.7
939	0.5936	0.09266	0.05859	0.1513	0.5772	0.05388	0.04261	0.09649	0.4524	0.03522	0.02555	0.06077	0.2241	0.005782	0.005292	0.01107	0.2003	0.009637	0.001671	0.01131	0.3914	0.05715	0.01587	0.07302	1.761	1.1219	0.2283	1.3503	1/11/2012	2/8/2012	F	Y	6	GW	2	657	658	4.8		10.7	11.7	14.5	14.8	15.3	16.3	16	16.2	16.4	16
946	0.6572	0.1075	0.07326	0.1807	0.5728	0.057	0.03637	0.09337	0.5197	0.04831	0.03589	0.0842	0.2355	0.007739	0.005315	0.01305	0.2697	0.01734	0.003346	0.02068	0.5396	0.1018	0.02591	0.1278	1.5646	0.8654	0.237	1.1024	1/17/2012	2/14/2012	M	Y	6	GW	2	640	655	4.8		10.6	15.3	18.7	18.7	19.3	20.3	21	21.6	21.8	22.8
954	0.6856	0.116	0.06492	0.1809	0.5833	0.0506	0.04342	0.09402	0.5605	0.05172	0.0383	0.09002	0.268	0.008459	0.00638	0.01484	0.2714	0.01568	0.002892	0.01857	0.4786	0.07816	0.02219	0.1003	1.5863	0.8683	0.2433	1.1117	1/22/2012	2/19/2012	F	Y	6	WG	2	626	624	5.2	7.3	10.7	12.3	15.9	15.8	15.5	15.9	17.7	17.7	18.7	20
962	0.6898	0.1339	0.07414	0.208	0.5914	0.0606	0.04347	0.1041	0.5033	0.04643	0.03302	0.07945	0.2614	0.00828	0.005785	0.01406	0.2315	0.01082	0.00236	0.01318	0.4892	0.07279	0.01985	0.09264	1.3998	0.7548	0.2232	0.978	1/24/2012	2/21/2012	F	Y	6	GW	2	642	661	4.6	7.8	10.7	13.1	14.5	14.3	14.4	14.8	17	16.9	15.4	16.9
981	0.7157	0.125	0.08083	0.2059	0.5854	0.05308	0.04178	0.09486	0.4699	0.03311	0.02716	0.06027	0.2456	0.006713	0.00543	0.01214	0.2265	0.01304	0.001831	0.01487	0.486	0.06961	0.01658	0.08619	1.7407	0.9705	0.2814	1.2518	2/14/2012	3/13/2012	F	Y	6	GW	2	659	662	4.2	7.9	9.6	12.2	16.8	16.9	18.8	17.4	18.5	19.2	19.8	20.7
997	0.8521	0.2126	0.1229	0.3355	0.7167	0.08672	0.05738	0.1441	0.5511	0.05241	0.04155	0.09397	0.2765	0.008265	0.007441	0.01571	0.2866	0.01951	0.002709	0.02222	0.5507	0.1073	0.02929	0.1366	1.6741	0.9178	0.2602	1.1781	2/22/2012	3/21/2012	M	Y	6	WG	2	668	739	4.9	9.2	11.1	14.9	19.3	19.9	21	21.2	21.7	23.5	22.7	23.3
1004	0.5669	0.08727	0.05391	0.1412	0.5169	0.0523	0.03283	0.08513	0.4494	0.03683	0.02882	0.06565	0.2392	0.007591	0.006374	0.01397	0.2325	0.01414	0.00189	0.01603	0.4324	0.06733	0.02053	0.08786	1.3541	0.765	0.2004	0.9655	2/27/2012	3/24/2012	M	Y	6	WG	2	737	738	5.2	8.4	10.9	13.9	15.6	16.1	16.5	17.4	17.4	18.4	18.6	18.1
1025	0.6302	0.1113	0.06482	0.1761	0.6	0.05667	0.04441	0.1011	0.4956	0.04071	0.0325	0.07321	0.2409	0.008237	0.006701	0.01494	0.2217	0.01022	0.002206	0.01242	0.4486	0.06634	0.01842	0.08476	1.5538	0.8476	0.2627	1.1103	3/13/2012	4/6/2012	F	Y	6	WG	2	736	624	5.6	9.6	12	13.6	15.4	16.5	15.9	15.7	15.6	16.5	16.5	17.8
1042	0.6732	0.1228	0.07572	0.1985	0.6102	0.06553	0.0434	0.1089	0.5298	0.04671	0.03671	0.08342	0.2501	0.006826	0.00579	0.01262	0.2604	0.01617	0.002307	0.01847	0.5043	0.07499	0.02322	0.09821	1.5276	0.7275	0.2308	0.9583	3/22/2012	4/19/2012	M	Y	6	WG	2	671	738	4.8	8.3	10.4	13.7	15.6	16.1	16.2	17	17	17	17.1	17.7
1050	0.6559	0.1186	0.06462	0.1832	0.5868	0.05985	0.04341	0.1033	0.4947	0.04502	0.0316	0.07662	0.2392	0.008007	0.005445	0.01345	0.2719	0.01516	0.004308	0.01947	0.4788	0.07079	0.03004	0.1008	1.5298	0.7679	0.2349	1.0028	3/22/2012	4/19/2012	M	Y	6	WG	2	671	738	5.2	8.7	10.2	12.5	15.5	14.6	15	16.4	16.9	16.4	16.8	17.2
1057	0.6643	0.1161	0.07657	0.1927	0.5577	0.05044	0.04081	0.09125	0.5527	0.05453	0.03737	0.0919	0.2643	0.008675	0.006336	0.01501	0.2808	0.01874	0.002909	0.02165	0.475	0.07128	0.02747	0.09875	1.5412	0.8122	0.2296	1.0417	3/24/2012	4/21/2012	M	Y	6	WG	2	737	738	6	8.8	9.2	11.4	14.1	15	15.9	16.4	17.4	17.9	18	17.7
1065	0.6386	0.1067	0.07064	0.1773	0.5668	0.05563	0.04178	0.09742	0.5511	0.05391	0.03756	0.09147	0.2614	0.008711	0.006128	0.01484	0.2864	0.01743	0.003956	0.02139	0.4073	0.06127	0.01709	0.07836	1.6445	0.7641	0.2553	1.0194	4/6/2012	5/4/2012	M	Y	6	WG	2	736	624	4.9	9	10.1	13.1	17.1	16.5	17	17.3	17.2	17.4	17.2	17.6
1073	0.6275	0.1054	0.0628	0.1682	0.5561	0.05074	0.03846	0.0892	0.5333	0.05027	0.03824	0.08851	0.257	0.009123	0.006061	0.01518	0.2659	0.01654	0.003018	0.01956	0.4857	0.06356	0.02096	0.08451	1.5806	0.8675	0.2681	1.1356	4/10/2012	5/7/2012	M	Y	6	WG	2	669	739	5.4	9	10.5	13.9	17.7	17.5	17.1	18.4	18.7	18.9	19.4
1026	0.7407	0.1533	0.09125	0.2445	0.6727	0.08569	0.05727	0.143	0.5847	0.05759	0.04326	0.1008	0.2545	0.00832	0.006525	0.01484	0.2855	0.01931	0.004249	0.02356	0.5349	0.1034	0.02454	0.1279	1.5594	0.8718	0.262	1.1338	3/13/2012	4/6/2012	M	Y	6	WG	2	736	624	6.9	10.9	13.5	18.4	20.5	21	20.9	22.5	22.7	23.6	23.9	24.1
1035	0.8294	0.1861	0.1009	0.2869	0.682	0.08943	0.05783	0.1473	0.5886	0.06787	0.04417	0.112	0.2763	0.0099	0.008386	0.01829	0.2832	0.01885	0.003393	0.02225	0.555	0.1081	0.0272	0.1353	1.7223	1.0686	0.3004	1.369	3/15/2012	4/12/2012	M	Y	6	WG	2	625	624	6.2		13	18.1	19.8	20.4	20.6	20.9	21.2	22.2	23.1	23.8
1043	0.7646	0.1602	0.09258	0.2528	0.646	0.07244	0.0511	0.1235	0.5473	0.05708	0.04187	0.09895	0.2721	0.01018	0.005728	0.01591	0.241	0.01207	0.002028	0.0141	0.4897	0.07124	0.02455	0.09579	1.5745	0.9706	0.2574	1.228	3/22/2012	4/19/2012	F	Y	6	WG	2	671	738	4.8	8.6	10.5	10	12.2	14.1	16.6	16.8	17.2	17.3	17.6	17.9
1058	0.6989	0.132	0.08128	0.2133	0.6304	0.06255	0.04758	0.1101	0.5777	0.05791	0.03927	0.09718	0.2197	0.006878	0.004354	0.01123	0.2225	0.009525	0.002503	0.01203	0.4691	0.07804	0.02444	0.1025	1.7512	0.9836	0.3117	1.2953	3/24/2012	4/21/2012	F	Y	6	WG	2	737	738	6.5	9.1	10.3	14	15.5	16.1	17.2	17.1	18	18.6	19	19.4
1066	0.762	0.1489	0.09397	0.2429	0.6691	0.0857	0.05417	0.1399	0.5684	0.06278	0.04284	0.1056	0.2739	0.0102	0.007391	0.01759	0.2838	0.01891	0.003615	0.02253	0.5857	0.1077	0.03954	0.1472	1.6958	0.9731	0.2858	1.2589	4/6/2012	5/4/2012	M	Y	6	WG	2	736	624	5.3	9.7	11.5	14.9	20.5	20.9	21.7	22.6	22.6	23.4	23.2	24
1074	0.8301	0.1827	0.1014	0.2841	0.6415	0.06493	0.04814	0.1131	0.5738	0.05654	0.03896	0.0955	0.2448	0.007863	0.005154	0.01302	0.1977	0.00926	0.001542	0.0108	0.5599	0.09164	0.03113	0.1228	1.5541	0.7531	0.2394	0.9925	4/10/2012	5/7/2012	F	Y	6	WG	2	669	739	5.1	9.2	11.4	14.7	18.6	19.2	20.1	21.3	21.6	23.4	23.3
999	0.7729	0.1557	0.0852	0.2409	0.6574	0.0647	0.05005	0.1148	0.5638	0.05469	0.04079	0.09548	0.2824	0.008393	0.007608	0.016	0.2503	0.01306	0.002436	0.0155	0.5587	0.08818	0.02814	0.1163	1.6418	0.8821	0.2518	1.1339	2/22/2012	3/21/2012	F	Y	6	WG	2	668	739	5.3	9.3	11.9	13.4	16.1	17.4	18	16.8	17.7	18.4	19.4	18.7
1006	0.6622	0.1164	0.07284	0.1892	0.6256	0.07579	0.05264	0.1284	0.5517	0.0511	0.04147	0.09257	0.2407	0.007819	0.005477	0.0133	0.2758	0.01673	0.003135	0.01987	0.4335	0.07401	0.01894	0.09295	1.5741	0.9679	0.2457	1.2136	2/27/2012	3/24/2012	M	Y	6	WG	2	737	738	4.9	7.9	10.1	12.5	16.5	16.5	17.3	18.3	19.2	21	20.7	21.7
1027					0.5836	0.06333	0.04868	0.112	0.4808	0.04553	0.03244	0.07797	0.2322	0.006532	0.005757	0.01229	0.2842	0.01556	0.004848	0.02041	0.5059	0.08765	0.02853	0.1162	1.3254	0.6625	0.2187	0.8811	3/13/2012	4/6/2012	M	Y	6	WG	2	736	624	6.5	10.4	12.9	16.4	19.5	20.4	20.5	21.5	21.6	21.5	21.9	22.2
1036	0.946	0.2436	0.1727	0.4162	0.7723	0.1093	0.07462	0.1839	0.6609	0.07684	0.05786	0.1347	0.2875	0.01198	0.008371	0.02035	0.2947	0.02453	0.003254	0.02779	0.6636	0.1286	0.02602	0.1546	1.6208	0.947	0.2641	1.2111	3/15/2012	4/12/2012	M	Y	6	WG	2	625	624	6.1		13.2	17.6	20.4	21.3	22.7	24	25.2	25.7	26.5	27.1
1044	0.8082	0.1814	0.09839	0.2797	0.716	0.08311	0.05957	0.1427	0.5898	0.05833	0.04539	0.1037	0.2808	0.009417	0.007281	0.0167	0.294	0.02057	0.003258	0.02383	0.5335	0.08531	0.02262	0.1079	1.5956	0.889	0.2499	1.1389	3/22/2012	4/19/2012	M	Y	6	WG	2	671	738	5.3	8.8	10.5	13.9	18.4	19.1	19.7	20.8	21.5	22.7	22.5	23.1
1052	0.7894	0.1468	0.08943	0.2362	0.6808	0.07643	0.04761	0.124	0.5457	0.04767	0.03589	0.08355	0.2545	0.006582	0.00528	0.01186	0.2389	0.01151	0.002142	0.01365	0.4568	0.07453	0.0171	0.09163	1.7537	1.0325	0.2678	1.3003	3/24/2012	4/21/2012	F	Y	6	WG	2	737	738	5.7	8	9.3	13	14.4	15.6	16.6	17.2	18.8	19.4	19.9	20.2
1067	0.8184	0.1575	0.09491	0.2525	0.6907	0.06825	0.05374	0.122	0.5857	0.06379	0.03504	0.09883	0.2717	0.008155	0.007082	0.01524	0.2763	0.01253	0.004231	0.01676	0.5126	0.08945	0.03106	0.1205	1.7414	0.8851	0.269	1.1541	4/6/2012	5/4/2012	F	Y	6	WG	2	736	624	5.7	9.9	11.1	13.1	16.1	15.8	16.4	16.6	16.4	17.7	16.7	17.7
1075	0.7382	0.1557	0.1017	0.2574	0.6307	0.06767	0.04976	0.1174	0.5563	0.0628	0.0446	0.1074	0.2413	0.007392	0.006373	0.01377	0.2452	0.01643	0.002467	0.01889	0.5138	0.1019	0.02383	0.1257	1.4949	0.8142	0.2239	1.038	4/10/2012	5/7/2012	M	Y	6	WG	2	669	739	4.2	7.8	10	13.2	15	15.8	16.8	17.8	18.4	18.8	19.5
1000	0.6508	0.1177	0.06333	0.1811	0.5673	0.0541	0.04052	0.09462	0.5252	0.05241	0.03234	0.08475	0.2512	0.00741	0.005888	0.0133	0.2547	0.01571	0.002618	0.01833	0.4416	0.06301	0.0227	0.08571	1.4956	0.7874	0.2414	1.0288	2/22/2012	3/21/2012	F	Y	6	WG	2	668	739	5.1	9.5	11.5	12.3	14.8	16.5	17.6	17.5	19.2	18.7	18.7	20.5
1007	0.7061	0.1253	0.0744	0.1997	0.6226	0.05318	0.04385	0.09703	0.525	0.04326	0.03715	0.08041	0.2689	0.007828	0.007144	0.01497	0.2588	0.01394	0.003065	0.017	0.5579	0.07394	0.02242	0.09636	1.6158	0.8799	0.2643	1.1442	2/27/2012	3/24/2012	F	Y	6	WG	2	737	738	4.9	8.1	10.2	11.1	13	14.9	15.5	15.5	15.3	16.5	17.6	17.4
1028	0.6521	0.1177	0.07483	0.1925	0.5888	0.05693	0.05035	0.1073	0.4862	0.04487	0.0299	0.07477	0.2448	0.007293	0.005901	0.01319	0.2644	0.01616	0.002937	0.01909	0.4278	0.06641	0.01712	0.08353	1.3811	0.6908	0.2181	0.9089	3/13/2012	4/6/2012	F	Y	6	WG	2	736	624	5.9	9.9	10.6	11.8	14.2	14.5	14.8	14.7	14.6	15.7	15.4	15.9
1045	0.6757	0.1074	0.06567	0.1731	0.5664	0.04799	0.03866	0.08665	0.5029	0.03865	0.0302	0.06885	0.218	0.004821	0.004553	0.009374	0.2239	0.011	0.002298	0.0133	0.4807	0.06886	0.02015	0.08901	1.4998	0.7894	0.2248	1.0142	3/22/2012	4/19/2012	M	Y	6	WG	2	671	738	4.4	8.1	9	11.4	14.3	15.2	15.8	15.8	15.9	17.1	17.3	17.4
1068	0.7535	0.1637	0.1009	0.2646	0.6373	0.0691	0.05667	0.1258	0.5471	0.05458	0.04335	0.09792	0.2559	0.008476	0.006568	0.01504	0.2525	0.01395	0.002597	0.01655	0.4979	0.08349	0.02238	0.1059	1.6059	0.8818	0.2716	1.1534	4/6/2012	5/4/2012	F	Y	6	WG	2	736	624	5	9.5	12.2	15.5	17.6	16.8	17.2	17.6	18	18.7	18.8	19.3
1076	0.7278	0.13	0.083	0.213	0.6701	0.07429	0.04996	0.1242	0.522	0.04688	0.03382	0.0807	0.2512	0.006815	0.006086	0.0129	0.2081	0.01046	0.001459	0.01192	0.4169	0.06823	0.02243	0.09066	1.515	0.7918	0.2508	1.0426	4/10/2012	5/7/2012	F	Y	6	WG	2	669	739	5.1	9.3	11.5	15.7	18.6	18.7	18.4	18.5	18.8	19.4	20.3
1093	0.6831	0.1283	0.07172	0.2	0.6367	0.06754	0.04757	0.1151	0.5319	0.04903	0.03467	0.0837	0.2603	0.008101	0.005969	0.01407	0.2801	0.01817	0.002829	0.021	0.4802	0.0797	0.0227	0.1024	1.5147	0.8317	0.2508	1.0825	4/18/2012	5/15/2012	M	Y	6	WG	2	668	624	5.6	8.5	12	17.6	20	20.7	22.4	23.6	24.6	26.1	26.6	28.5
1008	0.774	0.1681	0.109	0.2771	0.7119	0.08477	0.06691	0.1517					0.2442	0.00601	0.005136	0.01115	0.2796	0.01803	0.003463	0.02149	0.5132	0.08498	0.02404	0.109	1.5395	0.9015	0.2515	1.153	2/27/2012	3/24/2012	M	Y	6	WG	2	737	738	4.7	7.8	9.9	13	16.2	15.9	16	16.4	16.8	18.5	18.8	19
1030	0.8128	0.167	0.09999	0.267	0.6762	0.06166	0.05022	0.1119	0.5902	0.05574	0.04314	0.09887	0.2815	0.009919	0.007115	0.01703	0.265	0.01391	0.002478	0.01639	0.4966	0.08393	0.0235	0.1074	1.7913	0.9294	0.3141	1.2435	3/15/2012	4/12/2012	F	Y	6	WG	2	625	624	6		12.9	14.2	17.5	18.2	18.5	19.3	18.5	19.7	20.5	21.5
1046	0.684	0.1184	0.07234	0.1908	0.6006	0.05916	0.04728	0.1064	0.4728	0.03924	0.02779	0.06702	0.2356	0.006651	0.005286	0.01194	0.2555	0.01355	0.003103	0.01665	0.4581	0.06968	0.01838	0.08806	1.5853	0.7123	0.241	0.9532	3/22/2012	4/19/2012	F	Y	6	WG	2	671	738	5.2	8.8	9.8	11.2	12.9	13.7	15.5	15.2	15.7	15.9	16.1	16.2
1053	0.7362	0.1258	0.08675	0.2126	0.593	0.0515	0.04407	0.09557	0.5693	0.05307	0.0374	0.09047	0.2654	0.009839	0.006481	0.01632	0.2878	0.01567	0.003113	0.01878	0.51	0.07282	0.01908	0.09189	1.7412	1.0627	0.2917	1.3544	3/24/2012	4/21/2012	F	Y	6	WG	2	737	738	6	8.6	9.5	12.4	14.4	14.6	16.3	16.8	17.3	18.5	19.5	20.7
1069	0.8227	0.1771	0.1098	0.2869	0.7579	0.0956	0.06348	0.1591	0.6202	0.06879	0.04401	0.1128	0.2786	0.009834	0.006545	0.01638	0.2297	0.01372	0.002021	0.01574	0.5205	0.1009	0.02913	0.1301	1.7674	0.9852	0.3074	1.2926	4/6/2012	5/4/2012	M	Y	6	WG	2	736	624	5.6	9.8	11.6	15.9	20.2	19.9	21.3	21.8	22.2	23.2	23.2	23.8
1077	0.7737	0.1642	0.09462	0.2588	0.6641	0.07797	0.05341	0.1314	0.5972	0.05925	0.0422	0.1014	0.2989	0.009943	0.008791	0.01873	0.2958	0.01898	0.002911	0.02189	0.5027	0.08812	0.03091	0.119	1.6183	0.8472	0.2407	1.0879	4/10/2012	5/7/2012	M	Y	6	WG	2	669	739	4.6	8.8	10.7	15.9	18.7	18.9	20	20.9	21.4	21.5	21.8
1086	0.7207	0.1327	0.08292	0.2156	0.6589	0.07364	0.05773	0.1314	0.5007	0.04364	0.03133	0.07497	0.2331	0.007456	0.005347	0.0128	0.2488	0.01409	0.002195	0.01628	0.631	0.08983	0.0331	0.1229	1.4095	0.7584	0.2391	0.9975	4/18/2012	5/15/2012	M	Y	6	WG	2	668	624	6.1	9.2	12.6	18.6	21.5	21.7	22.5	23.1	24.2	24.9	25.2	26.2
1001	0.6531	0.109	0.07387	0.1829	0.5864	0.05288	0.04567	0.09854	0.5262	0.04661	0.03728	0.08389	0.2778	0.008238	0.00672	0.01496	0.2958	0.01604	0.004364	0.02041	0.4862	0.07515	0.02086	0.09601	1.4628	0.7083	0.2255	0.9338	2/27/2012	3/24/2012	F	Y	6	WG	2	737	738	5.2	8.3	9.6	10.9	12.6	13.4	13.8	14.1	14.4	15.5	15.3	15.3
1031	0.8162	0.1832	0.1076	0.2908	0.6241	0.06846	0.04973	0.1182	0.5601	0.05457	0.03466	0.08923	0.2783	0.009081	0.00674	0.01582	0.2683	0.01683	0.00259	0.01942	0.4515	0.08223	0.02476	0.107	1.7282	1.1082	0.2583	1.3665	3/15/2012	4/12/2012	M	Y	6	WG	2	625	624	5.9		12.8	18.2	21.5	22.3	22	23	24.2	25.5	24.7	25.5
1047	0.7263	0.1504	0.09329	0.2437	0.6135	0.06483	0.05024	0.1151	0.5393	0.05332	0.03696	0.09028	0.2649	0.008125	0.006423	0.01455	0.275	0.01983	0.00272	0.02255	0.4782	0.08304	0.02562	0.1087	1.4905	0.8698	0.2466	1.1164	3/22/2012	4/19/2012	M	Y	6	WG	2	671	738	5.2	8.7	10.2	11.8	16	17.3	17.7	19	19.4	19.8	19.8	20
1054	0.6993	0.1385	0.07927	0.2178	0.5796	0.06238	0.04207	0.1045	0.5172	0.04948	0.03214	0.08162	0.2354	0.007232	0.005654	0.01289	0.2695	0.02053	0.002676	0.02321	0.4728	0.07806	0.026	0.1041	1.5364	0.8563	0.2427	1.0991	3/24/2012	4/21/2012	M	Y	6	WG	2	737	738	6.3	8.8	10.1	15.2	17.7	18.2	19.4	20	21	22	22.6	22.2
1070	0.7709	0.16	0.1002	0.2602	0.6705	0.07488	0.05787	0.1328	0.5948	0.06341	0.05082	0.1142	0.2976	0.01089	0.008921	0.01981	0.2745	0.01738	0.003074	0.02045	0.5286	0.08462	0.02731	0.1119	1.5886	0.8652	0.2498	1.115	4/6/2012	5/4/2012	F	Y	6	WG	2	736	624	5.6	10.4	11.9	12.6	15.1	16.6	17.3	17.5	17.7	18.9	19.7	20.5
1079	0.7548	0.1508	0.1008	0.2516	0.7117	0.0888	0.05767	0.1465	0.523	0.04826	0.03711	0.08537	0.2695	0.008292	0.00623	0.01452	0.27	0.01674	0.002504	0.01924	0.5129	0.09617	0.02423	0.1204	1.6427	0.9719	0.2731	1.245	4/10/2012	5/7/2012	M	Y	6	WG	2	669	739	5.3	9.3	10.9	14.9	17.5	17.6	18.8	20.1	20	21.2	21.6
1002	0.6992	0.1315	0.07572	0.2072	0.6207	0.05464	0.04584	0.1005	0.5228	0.0472	0.03109	0.0783	0.2447	0.007443	0.005149	0.01259	0.2605	0.01622	0.002451	0.01867	0.4782	0.07234	0.01742	0.08976	1.5739	0.8857	0.2525	1.1382	2/27/2012	3/24/2012	F	Y	6	WG	2	737	738	5.5	8.5	11.2	13	14.7	15.3	15.2	15.4	15.4	17.4	17.2	17.8
1032	0.7854	0.174	0.1107	0.2847	0.7135	0.09741	0.07045	0.1679	0.6315	0.08816	0.0573	0.1455	0.2985	0.01456	0.008633	0.02319	0.3049	0.02399	0.004373	0.02836	0.7398	0.1202	0.02779	0.148	1.8031	1.0488	0.3091	1.3579	3/15/2012	4/12/2012	M	Y	6	WG	2	625	624	6.5		13.3	19.2	22.4	22.8	23.3	24.2	24.9	26.2	25.9	26.3
1040	0.7804	0.1633	0.09596	0.2592	0.6755	0.07244	0.04589	0.1183	0.5607	0.05879	0.04417	0.103									0.5931	0.09816	0.02274	0.1209	1.4659	0.8001	0.2251	1.0251	3/20/2012	4/10/2012	M	Y	6	WG	2	669	739	5.7	10.6	12.4	17.8	20.1	21.3	21.7	23.1	23.1	24	25.7	26.2
1048	0.6703	0.1132	0.07733	0.1905	0.562	0.06347	0.03668	0.1001	0.5088	0.04706	0.03483	0.0819	0.1773	0.004939	0.003761	0.0087	0.2287	0.01195	0.002329	0.01428	0.5359	0.06978	0.01858	0.08836	1.4411	0.7067	0.2328	0.9395	3/22/2012	4/19/2012	F	Y	6	WG	2	671	738	5.1	8.9	9.6	12.9	15.6	15.7	16.2	15.3	15.7	15.9	16.6	16.3
1055	0.8406	0.1692	0.1068	0.276	0.669	0.06977	0.04759	0.1174	0.6207	0.06637	0.04916	0.1155	0.2464	0.007811	0.005293	0.0131	0.2472	0.01509	0.00241	0.0175	0.5275	0.09179	0.01996	0.1118	1.8854	1.0968	0.3134	1.4103	3/24/2012	4/21/2012	M	Y	6	WG	2	737	738	6.8	9.3	10.7	15.8	16.7	17.8	19.2	19.9	20.3	21.5	22.6	22.9
1071	0.674	0.1236	0.07353	0.1971	0.5485	0.0488	0.04008	0.08888	0.5126	0.05122	0.03324	0.08446	0.2262	0.006054	0.005107	0.01116	0.22	0.01092	0.001963	0.01288	0.4179	0.06843	0.01824	0.08667	1.7109	0.9712	0.2755	1.2468	4/10/2012	5/7/2012	F	Y	6	WG	2	669	739	5.2	8.5	10.2	12.1	14.7	16.2	15.6	15.6	16.3	17.3	17.6
1003	0.6457	0.1169	0.07053	0.1875	0.5799	0.0632	0.04794	0.1111	0.4819	0.03967	0.03168	0.07135	0.2167	0.006912	0.004042	0.01095	0.228	0.01343	0.001999	0.01542	0.4898	0.07514	0.02037	0.09552	1.6131	0.9633	0.2514	1.2147	2/27/2012	3/24/2012	F	Y	6	WG	2	737	738	5.3	8.7	11.1	12.5	14.8	15.2	16.4	18	17.9	20	19.3	19.8
1024	0.6209	0.1027	0.06253	0.1652	0.5457	0.04908	0.03694	0.08601	0.4781	0.04384	0.02596	0.0698	0.2336	0.006369	0.005941	0.01231	0.2508	0.01239	0.003199	0.01559	0.4207	0.06338	0.02019	0.08357	1.577	0.9015	0.2583	1.1597	3/13/2012	4/6/2012	M	Y	6	WG	2	736	624	6.6	11.1	14.8	20.9	22.9	23.2	22.9	22.2	22.7	23.2	24.6	25.4
1033	0.8038	0.1816	0.1003	0.2819	0.6953	0.08307	0.05766	0.1407	0.6233	0.06963	0.04879	0.1184	0.2929	0.01104	0.006956	0.018	0.2899	0.02162	0.002811	0.02444	0.6219	0.1106	0.02493	0.1355	1.5609	0.8299	0.2554	1.0853	3/15/2012	4/12/2012	M	Y	6	WG	2	625	624	6.1		12.1	16.5	18.8	19.1	19.7	20.1	20.9	21.4	22	22.3
1041	0.8081	0.1854	0.1033	0.2887	0.6926	0.07996	0.05538	0.1353	0.561	0.0558	0.0453	0.1011	0.2925	0.0113	0.007967	0.01926	0.234	0.009639	0.002549	0.01219	0.5902	0.09754	0.02596	0.1235	1.8138	0.9058	0.2804	1.1862	3/20/2012	4/10/2012	F	Y	6	WG	2	669	739	5.3	9.8	11.6	14.6	16.7	18.7	19.6	20.3	21.1	22.4	22.3	23.2
1049	0.6225	0.1008	0.05565	0.1565	0.5874	0.05965	0.0428	0.1024	0.4862	0.04346	0.0272	0.07066	0.2352	0.007343	0.005215	0.01256	0.2322	0.01472	0.001969	0.01669	0.4576	0.06939	0.0201	0.08949	1.3691	0.7506	0.2192	0.9698	3/22/2012	4/19/2012	M	Y	6	WG	2	671	738	5	8.5	9.3	11	14.1	15.7	15.6	16.3	17.1	17.7	17.5	17.4
1056	0.7156	0.1367	0.09672	0.2335	0.6149	0.0686	0.04672	0.1153	0.5276	0.05622	0.03923	0.09545	0.2507	0.008466	0.006698	0.01516	0.3027	0.02046	0.004154	0.02461	0.487	0.08736	0.02514	0.1125	1.548	0.9266	0.2429	1.1695	3/24/2012	4/21/2012	M	Y	6	WG	2	737	738	6.4	8.9	10.1	13.6	16.4	17.9	18.5	18.4	18.5	19.8	20.3	20.3
1064	0.5922	0.1038	0.06414	0.168	0.5844	0.0654	0.05004	0.1154	0.4944	0.04472	0.03574	0.08046	0.2581	0.009138	0.007302	0.01644	0.257	0.01764	0.002826	0.02046	0.4686	0.07866	0.02314	0.1018	1.4032	0.6864	0.231	0.9174	4/6/2012	5/4/2012	M	Y	6	WG	2	736	624	5.6	10	12	16.3	20.7	20.2	20.8	20.9	21.2	22	22.1	22.7
1072	0.7056	0.1298	0.07907	0.2088	0.6771	0.07534	0.05427	0.1296	0.5276	0.05149	0.03509	0.08658	0.255	0.008705	0.005926	0.01463	0.2298	0.01302	0.001796	0.01482	0.4718	0.0704	0.02361	0.09402	1.7342	0.9691	0.268	1.2372	4/10/2012	5/7/2012	F	Y	6	WG	2	669	739	5.9	9.7	12.2	14.7	16.9	18.2	18.7	19.7	19.2	20.6	20.9
1105	0.6638	0.1089	0.06611	0.175	0.5488	0.04456	0.03704	0.08159	0.5526	0.04723	0.03262	0.07985	0.2685	0.009353	0.006805	0.01616	0.2365	0.01273	0.00228	0.01501	0.5472	0.07286	0.01716	0.09002	1.5107	0.7573	0.2245	0.9818	5/1/2012	5/29/2012	F	Y	6	WG	2	671	738	4.4	7.7	7.9	10.7	15	14.1	15	16	16.3	16.7	16.9	19.2
1113	0.8027	0.1764	0.1024	0.2788	0.7676	0.1039	0.0764	0.1803	0.6274	0.08205	0.04281	0.1249	0.2645	0.01006	0.006339	0.01639	0.2922	0.02081	0.003701	0.02451	0.5616	0.09714	0.03683	0.134	1.7481	1.0096	0.3144	1.324	5/3/2012	5/25/2012	M	Y	6	WG	2	625	739	6.1	10.2	13	18.3	20.1	19.7	21.3	21.5	21.8	23.2	23.1	24.5
1120	0.6858	0.1271	0.07336	0.2005	0.5805	0.05119	0.04192	0.09311	0.5452	0.05096	0.03524	0.08621	0.2464	0.008328	0.005843	0.01417	0.2441	0.01288	0.002775	0.01566	0.4549	0.07343	0.02564	0.09907	1.4655	0.7392	0.2411	0.9803	5/7/2012	6/4/2012	F	Y	6	WG	2	669	739	4.9	8.7	11	13.7	15.3	15.4	16.6	17.7	18	18.6	18.5	19.1
1136	0.7885	0.1686	0.1018	0.2704	0.7047	0.09017	0.06895	0.1591	0.5604	0.05818	0.04121	0.09939	0.2882	0.01049	0.00822	0.01871	0.3219	0.02491	0.004021	0.02893	0.5065	0.08368	0.02517	0.1088	1.4066	0.7593	0.2291	0.9884	5/15/2012	6/12/2012	M	Y	6	WG	2	668	624	7	11.1	13.4	17.3	20	21.2	21.9	22.5	23.1	24.2	24.9	25.1
1152	0.6425	0.1138	0.05566	0.1694	0.5785	0.0664	0.03566	0.1021	0.5593	0.06079	0.04258	0.1034	0.2731	0.009187	0.007731	0.01692	0.2671	0.01656	0.003053	0.01961	0.5926	0.09819	0.02762	0.1258	1.47	0.819	0.227	1.046	5/25/2012	6/19/2012	M	Y	6	WG	2	625	739	5.2	7.9	8.9	12	16.7	16.9	18	18.5	19.6	20.4	20.8	21.6
1168	0.6239	0.1092	0.07246	0.1817	0.564	0.06405	0.0393	0.1034	0.4972	0.04859	0.03217	0.08076	0.2394	0.00773	0.006918	0.01465	0.2502	0.01426	0.004055	0.01831	0.48	0.07848	0.02927	0.1077	1.5469	0.8204	0.2323	1.0527	5/25/2012	6/22/2012	M	Y	6	WG	2	736	738	5.2	9	10.5	12.4	16.3	16.8	18.6	18.3	18.7	18.9	19.9	19.6
1175	0.5869	0.09151	0.06185	0.1534	0.555	0.04894	0.0447	0.09364	0.4572	0.03656	0.02742	0.06397	0.2093	0.005338	0.004739	0.01008	0.2296	0.01076	0.002841	0.0136	0.4914	0.06907	0.02018	0.08925	1.3348	0.6965	0.185	0.8815	5/30/2012	6/27/2012	F	Y	2	WG	2	1018	1015	4	6.4	8.2	9.9	11.5	12.2	12.6	12.9	13.4	14	13.7	14
1202	0.6951	0.1126	0.07481	0.1875	0.5359	0.04593	0.03982	0.08575	0.5475	0.05363	0.03477	0.0884	0.2546	0.008037	0.005344	0.01338	0.2536	0.01046	0.002985	0.01344	0.4178	0.06976	0.02304	0.0928	1.5824	0.8607	0.2357	1.0964	6/4/2012	6/28/2012	F	Y	2	GW	2	1009	1012	5.3	9.6	11.6	12.3	14	15.6	16.9	16.7	18	19.1	19	19.2
1137	0.7634	0.1538	0.08499	0.2388	0.7236	0.09106	0.06011	0.1512	0.575	0.05454	0.03947	0.09401	0.3109	0.01216	0.009702	0.02187	0.2619	0.01941	0.002081	0.02149	0.6357	0.101	0.02875	0.1297	1.4611	0.7385	0.2286	0.9672	5/15/2012	6/12/2012	M	Y	6	WG	2	668	624	5.8	10.1	13.1	17.6	20.3	21.4	23	23.7	24.1	26.2	25	26.8
1153	0.6281	0.1032	0.0624	0.1656	0.525	0.0438	0.03258	0.07638	0.5015	0.04505	0.02909	0.07414	0.2305	0.006273	0.005321	0.01159	0.2179	0.01284	0.001806	0.01464	0.4931	0.06893	0.02517	0.09409	1.5024	0.7339	0.2292	0.963	5/25/2012	6/19/2012	F	Y	6	WG	2	625	739	4.9	8.2	10.5	12.2	14.5	15.4	17	16.2	17.1	17.7	18	17.7
1161	0.64	0.116	0.07181	0.1878	0.5662	0.05661	0.04199	0.0986	0.5072	0.04399	0.03248	0.07647	0.2475	0.00843	0.005624	0.01405	0.2565	0.013	0.003292	0.0163	0.4907	0.05852	0.02019	0.07871	1.6697	0.9458	0.2889	1.2347	5/25/2012	6/19/2012	F	Y	6	WG	2	625	739	5.2	8.3	10.6	13.4	15.2	15.9	16.7	16.2	17.1	17.6	17.8	18.7
1169	0.6661	0.1182	0.08012	0.1983	0.5774	0.05917	0.04015	0.09931	0.5193	0.05652	0.03289	0.08941	0.2507	0.008686	0.006775	0.01546	0.2682	0.02045	0.002941	0.02339	0.5065	0.08849	0.02113	0.1096	1.5424	0.8294	0.2556	1.085	5/25/2012	6/22/2012	F	Y	6	WG	2	736	738	5.1	8.6	10.3	12	15	15.8	16.6	16	16.8	17.5	16.9	17.4
1195	0.6675	0.106	0.06809	0.1741	0.5674	0.0424	0.03723	0.07962	0.5135	0.04033	0.026	0.06632	0.2767	0.008627	0.006578	0.01521	0.2876	0.01524	0.003746	0.01899	0.502	0.06607	0.01711	0.08318	1.5345	0.7127	0.2261	0.9388	6/2/2012	6/24/2012	F	Y	2	WG	2	1017	1015	5.5	8.8	11.1	13.3	15	15.7	15.1	16.2	15.7	15.5	17.3	16.9
1107	0.6984	0.1275	0.07869	0.2062	0.5555	0.04491	0.04102	0.08593	0.5304	0.05121	0.03821	0.08942	0.2555	0.008372	0.005994	0.01437	0.2447	0.01017	0.002678	0.01285	0.5137	0.0791	0.0245	0.1036	1.7073	1.0215	0.2696	1.2911	5/1/2012	5/29/2012	F	Y	6	WG	2	671	738	5.2	8.1	8.3	10.9	15.2	15.6	16.2	17.1	17.5	17.1	17	18.1
1114	0.658	0.1265	0.07097	0.1974	0.6014	0.05633	0.04828	0.1046	0.5202	0.0458	0.03495	0.08075	0.2838	0.00898	0.0076	0.01658	0.2625	0.01495	0.00275	0.0177	0.5054	0.08573	0.02134	0.1071	1.5698	0.8145	0.2557	1.0702	5/3/2012	5/25/2012	F	Y	6	WG	2	625	739	5.4	9.3	10.7	12.6	14.8	15.2	16.5	16.3	16.9	17.7	17.8	18.1
1122	0.6809	0.1449	0.07923	0.2242	0.6394	0.07489	0.05312	0.128	0.5445	0.05517	0.03875	0.09392	0.2461	0.006816	0.005402	0.01222	0.2434	0.01242	0.002979	0.0154	0.5074	0.09417	0.02468	0.1189	1.5571	0.9404	0.2314	1.1718	5/7/2012	6/4/2012	M	Y	6	WG	2	669	739	4.9	7.9	11.2	15.6	19.3	18.4	19.1	19.9	20.4	21.2	21.5	21.8
1154	0.5971	0.1011	0.06314	0.1643	0.4865	0.03808	0.02605	0.06413	0.4495	0.03613	0.03056	0.06669	0.229	0.00628	0.004508	0.01079	0.2129	0.01057	0.001648	0.01222	0.4554	0.05923	0.0204	0.07962	1.4209	0.672	0.2172	0.8893	5/25/2012	6/19/2012	F	Y	6	WG	2	625	739	3.9	7	8.6	11.2	13.4	13.4	14.5	13.9	15.1	15.8	16	16.5
1162	0.8066	0.1664	0.1106	0.277	0.6807	0.08513	0.05407	0.1392	0.5562	0.06139	0.03858	0.09998	0.2754	0.01004	0.008145	0.01819	0.2742	0.01688	0.002729	0.01961	0.5661	0.09918	0.02801	0.1272	1.6278	0.9233	0.2661	1.1894	5/25/2012	6/22/2012	M	Y	6	WG	2	736	738	4.9	9.1	11.5	14.6	19.5	20	21.4	22.4	23.8	24.5	25	25.8
1196	0.7325	0.143	0.08985	0.2329	0.6623	0.07302	0.05336	0.1264	0.5415	0.04953	0.03551	0.08504	0.2477	0.00715	0.004728	0.01188	0.2638	0.01281	0.003391	0.0162	0.5256	0.09634	0.02468	0.121	1.5548	0.7814	0.2316	1.0129	6/2/2012	6/24/2012	M	Y	2	WG	2	1017	1015	5.9	9.1	11.7	10.6	15	16.5	18.3	18.8	19	19.7	19.8	21.1
1204	0.842	0.2022	0.1106	0.3128	0.7752	0.1123	0.06972	0.182	0.6298	0.06934	0.05649	0.1258	0.3103	0.01308	0.011145	0.02437	0.309	0.02199	0.004322	0.02631	0.6672	0.1304	0.0465	0.1777	1.7424	1.0934	0.3265	1.4199	6/5/2012	7/3/2012	M	Y	6	WG	2	626	624	7.2	13.1	14.4	19	24	24	26	26.4	27	27.9	28.4	29.3
1100	0.6367	0.09963	0.05824	0.1579	0.5647	0.05089	0.0364	0.08729	0.4802	0.03508	0.02449	0.05957	0.2238	0.005429	0.004926	0.01036	0.1998	0.00877	0.001286	0.01006	0.3857	0.05494	0.01611	0.07105	1.5447	0.7934	0.2436	1.037	5/1/2012	5/29/2012	F	Y	6	WG	2	671	738	3.8	6.2	6.2	9.4	13	13.7	14.6	15.5	16.2	16.8	16.2	18.5
1108	0.6939	0.1425	0.08023	0.2228	0.5916	0.07246	0.04271	0.1152	0.5432	0.05226	0.04119	0.09345	0.2281	0.007076	0.004991	0.01207	0.2554	0.01437	0.003646	0.01801	0.4891	0.06975	0.02943	0.09918	1.4205	0.7409	0.2225	0.9633	5/1/2012	5/29/2012	M	Y	6	WG	2	671	738	4.9	8.1	8.2	11.6	18.3	17.6	18.2	19	20.4	20.5	20.5	21.3
1115	0.8333	0.1819	0.09184	0.2738	0.7561	0.08223	0.0762	0.1584	0.6487	0.07854	0.04987	0.1284	0.3094	0.01078	0.007909	0.01869	0.3028	0.01874	0.003919	0.02266	0.6044	0.1143	0.03313	0.1474	1.7031	0.9687	0.2813	1.25	5/3/2012	5/25/2012	F	Y	6	WG	2	625	739	6.8	10.2	12.2	14.5	16.9	18	19.9	20.4	22.2	22.7	22.4	24.1
1123	0.7728	0.1808	0.089	0.2698	0.7074	0.08925	0.05386	0.1431	0.5818	0.05973	0.0445	0.1042	0.2739	0.008896	0.006933	0.01583	0.2219	0.01173	0.00179	0.01352	0.5773	0.08956	0.02351	0.1131	1.497	0.7959	0.2303	1.0262	5/7/2012	6/4/2012	M	Y	6	WG	2	669	739	5.3	8.6	11.2	15.2	17.7	17.5	18.4	19.4	20.8	21.6	21.4	22.2
1139	0.849	0.2079	0.106	0.3139	0.6863	0.08222	0.05305	0.1353	0.5805	0.06626	0.03927	0.1055	0.2978	0.01121	0.008238	0.01945	0.2951	0.01913	0.003489	0.02262	0.4935	0.08697	0.02541	0.1124	1.4971	0.7862	0.2318	1.018	5/15/2012	6/12/2012	M	Y	6	WG	2	668	624	5.7	9.9	12.2	15.4	17.4	19.2	20.7	22.1	22.6	23.9	24	24.7
1155	0.5839	0.1022	0.05486	0.157	0.5097	0.0411	0.03418	0.07528	0.4594	0.04111	0.02863	0.06973	0.221	0.006613	0.005253	0.01187	0.2189	0.01087	0.002136	0.013	0.4915	0.07249	0.02172	0.09421	1.5227	0.8352	0.2437	1.0789	5/25/2012	6/19/2012	F	Y	6	WG	2	625	739	5.7	8.9	10.4	12.6	14.7	14.7	16.4	16.4	17.6	18.2	18.1	17.7
1170	0.6791	0.117	0.08738	0.2044	0.5954	0.06227	0.04201	0.1043	0.4719	0.04621	0.02803	0.07424	0.2432	0.00713	0.005158	0.01229	0.2429	0.01124	0.003016	0.01426	0.4381	0.06812	0.02065	0.08877	1.3835	0.7499	0.1961	0.946	5/30/2012	6/27/2012	M	Y	2	WG	2	1018	1015	4.5	7	9.3	12.6	16.2	16.8	18.2	18.8	19.4	19.8	19.8	20.3
1197	0.7346	0.1189	0.08651	0.2054	0.6511	0.06502	0.04961	0.1146	0.5554	0.04643	0.03511	0.08155	0.2616	0.008075	0.005587	0.01366	0.2581	0.01152	0.003225	0.01474	0.456	0.06102	0.01943	0.08045	1.6235	0.8911	0.2423	1.1334	6/2/2012	6/24/2012	F	Y	2	WG	2	1017	1015	5.4	8.8	10.4	12.4	14.2	15	15.5	16.9	16.9	17.8	19.3	18.3
1205	0.7428	0.1514	0.09279	0.2442	0.6075	0.07115	0.0443	0.1154	0.5604	0.05974	0.04434	0.1041	0.272	0.01036	0.006266	0.01662	0.2963	0.02179	0.003532	0.02532	0.5711	0.1161	0.02574	0.1418	1.7978	1.1415	0.3073	1.4488	6/5/2012	7/3/2012	M	Y	6	WG	2	626	624	6.8	11.5	12.6	16.5	19.6	19.9	21.1	21.3	22.2	23.4	24	24.1
1101	0.7645	0.1441	0.08501	0.2291	0.6899	0.06817	0.06115	0.1293	0.5537	0.04625	0.03307	0.07933	0.2497	0.006551	0.006042	0.01259	0.243	0.01446	0.002244	0.0167	0.4923	0.08442	0.02868	0.1131	1.5043	0.8228	0.2166	1.0394	5/1/2012	5/29/2012	M	Y	6	WG	2	671	738	4.6	6.5	6.6	12.4	16.9	16.3	17.7	18.2	19.2	19.7	20.5	22.4
1109	0.7557	0.149	0.09494	0.2439	0.6452	0.06316	0.05139	0.1145	0.5337	0.04967	0.03608	0.08575	0.2703	0.007954	0.00637	0.01432	0.2369	0.01219	0.00201	0.0142	0.4741	0.08054	0.01937	0.0999	1.7793	1.0528	0.2953	1.3481	5/1/2012	5/29/2012	F	Y	6	WG	2	671	738	4.6	7.8	8.4	8.7	13.7	13.5	14.8	15.7	16.6	17.4	17.4	19.5
1116	0.728	0.1455	0.08229	0.2278	0.6374	0.07362	0.04993	0.1235	0.5528	0.05691	0.03584	0.09275	0.2726	0.008593	0.006816	0.01541	0.2438	0.01191	0.002266	0.01418	0.5382	0.08621	0.02725	0.1135	1.6747	0.9072	0.309	1.2163	5/3/2012	5/25/2012	F	Y	6	WG	2	625	739	5.9	9.7	11.5	13.2	15.6	16.9	19.4	19.3	20.7	20.7	20	20.6
1124	0.6937	0.1274	0.07405	0.2014	0.6275	0.07084	0.04911	0.1199	0.5432	0.05541	0.03913	0.09453	0.2471	0.008867	0.006174	0.01504	0.2538	0.01661	0.002267	0.01888	0.5483	0.08196	0.02314	0.1051	1.5865	0.9482	0.2663	1.2145	5/7/2012	6/4/2012	M	Y	6	WG	2	669	739	5.5	9.1	12.3	17	17.9	17.3	18.1	19.8	20.9	22.2	23.2	23.5
1140	0.802	0.2019	0.1048	0.3067	0.7346	0.09964	0.06387	0.1635	0.5903	0.06571	0.05519	0.1209	0.2787	0.01021	0.008644	0.01885	0.3139	0.02405	0.003931	0.02798	0.5397	0.09068	0.03116	0.1218	1.4661	0.8271	0.2443	1.0715	5/15/2012	6/12/2012	M	Y	6	WG	2	668	624	5.7	10.1	12.7	17	19.7	19.9	21.3	21.8	22.4	23.1	23	24.9
1156	0.8394	0.1957	0.126	0.3217	0.7614	0.1127	0.06807	0.1808	0.6904	0.09672	0.06149	0.1582	0.3217	0.0134	0.009996	0.0234	0.3581	0.035255	0.005091	0.0403	0.6108	0.1193	0.03824	0.1575	1.531	0.9406	0.2535	1.1941	5/25/2012	6/19/2012	M	Y	6	WG	2	625	739	6	9.4	11.7	17.6	21.3	22.2	24.3	24.7	25.1	25.3	26.1	26.5
1164	0.7371	0.1294	0.08485	0.2142	0.5568	0.04103	0.0372	0.07823	0.5222	0.04526	0.03079	0.07606	0.2487	0.006463	0.005573	0.01204	0.2299	0.01096	0.001977	0.01294	0.4309	0.06302	0.01915	0.08217	1.6688	0.8983	0.2576	1.1559	5/25/2012	6/22/2012	F	Y	6	WG	2	736	738	3.7	7.3	9	11.6	13.8	14.9	16.3	15.9	16.7	17.9	17.2	17.6
1171	0.6988	0.1248	0.08298	0.2078	0.5877	0.05646	0.04304	0.0995	0.4884	0.04248	0.03603	0.07852	0.2369	0.007141	0.005467	0.01261	0.253	0.01471	0.002988	0.0177	0.4875	0.08427	0.02682	0.1111	1.4203	0.8511	0.2013	1.0524	5/30/2012	6/27/2012	M	Y	2	WG	2	1018	1015	4.4	7.2	9.6	12.7	16.3	16.8	17.1	18.5	19.1	19.6	19.6	19.7
1198	0.7382	0.1582	0.09802	0.2562	0.6607	0.08263	0.05959	0.1422	0.6515	0.07394	0.05131	0.1253	0.2891	0.01003	0.008316	0.01834	0.2985	0.01847	0.005029	0.0235	0.6476	0.1067	0.02913	0.1358	1.6419	1.0176	0.2763	1.2939	6/2/2012	6/24/2012	M	Y	2	WG	2	1017	1015	6.5	10.2	13.8	12.6	18.6	20.7	21.1	20.4	20.7	21.4	21.4	22.7
1206	0.669	0.1228	0.08203	0.2048	0.5719	0.05718	0.04128	0.09847	0.4589	0.04314	0.02901	0.07215	0.2477	0.007103	0.005166	0.01227	0.2671	0.01251	0.004464	0.01697	0.5191	0.06862	0.02419	0.09281	1.628	0.9642	0.2545	1.2187	6/6/2012	6/28/2012	F	Y	2	WG	2	1062	1059	5.3	8.9	10	10.6	12.3	13.6	15.3	16.1	16.4	16.2	16.6	16.9
1102	0.6764	0.1074	0.07069	0.1781	0.5345	0.04405	0.03052	0.07458	0.4591	0.0377	0.02308	0.06078	0.2372	0.007108	0.003799	0.01091	0.218	0.01155	0.001436	0.01299	0.4816	0.08263	0.02543	0.1081	1.5098	0.7253	0.2407	0.966	5/1/2012	5/29/2012	M	Y	6	WG	2	671	738	3	5.6	6	10.9	12.5	12.4	13.1	14.4	15.2	14.4	14.4	15.5
1110	0.6926	0.1131	0.07368	0.1868	0.6527	0.07073	0.0484	0.1191	0.4883	0.04054	0.02713	0.06768	0.2348	0.005972	0.005071	0.01104	0.2265	0.01081	0.001817	0.01263	0.5056	0.07516	0.02158	0.09673	1.3428	0.603	0.1894	0.7924	5/1/2012	5/29/2012	M	Y	6	WG	2	671	738	3.6	7.6	6.4	9	13	12.6	13.2	13.7	14.8	14.8	15.2	17.1
1117	0.8717	0.1795	0.109	0.2885	0.714	0.06679	0.05552	0.1223	0.6706	0.07123	0.05272	0.1239	0.3068	0.0103	0.007888	0.01818	0.2318	0.01158	0.001944	0.01352	0.5068	0.07819	0.02301	0.1012	1.8918	1.13	0.3058	1.4357	5/3/2012	5/25/2012	F	Y	6	WG	2	625	739	5.2	9.1	11.4	14.3	15.7	17.2	18.6	17.9	19.9	20.1	20	20.6
1141	0.9282	0.2322	0.1271	0.3593	0.7621	0.1012	0.06533	0.1666	0.5613	0.05614	0.03815	0.09429	0.3258	0.01392	0.009072	0.02299	0.3081	0.02095	0.003652	0.02461	0.5109	0.1017	0.0248	0.1265	1.3655	0.7392	0.2133	0.9525	5/15/2012	6/12/2012	M	Y	6	WG	2	668	624	6.3	10.6	12.3	15.6	20.1	20.8	22.3	23.5	24	25.3	24.7	25.6
1157	0.756	0.1651	0.09601	0.2612	0.626	0.06932	0.0487	0.118	0.5486	0.05851	0.04291	0.1014	0.2568	0.008056	0.006611	0.01467	0.2545	0.01802	0.002202	0.02022	0.5202	0.09283	0.02618	0.119	1.4609	0.8323	0.2228	1.0551	5/25/2012	6/19/2012	M	Y	6	WG	2	625	739	5.5	8.7	11.1	16.5	18.8	19.7	21	20.2	21.2	23	23.5	23.2
1165	0.6441	0.1136	0.06071	0.1743	0.5731	0.05033	0.04982	0.1001	0.4789	0.04435	0.03449	0.07885	0.2299	0.007262	0.004685	0.01195	0.2253	0.01093	0.001834	0.01277	0.4639	0.06554	0.02438	0.08992	1.6072	0.9105	0.2724	1.1829	5/25/2012	6/22/2012	F	Y	6	WG	2	736	738	4.3	7.8	10.3	11.7	15.5	15.6	16.1	15.2	16.5	17.2	18.1	18.5
1172	0.6989	0.1324	0.08886	0.2212	0.6034	0.06207	0.04893	0.111	0.5637	0.05907	0.04599	0.1051	0.2642	0.007829	0.006919	0.01475	0.3053	0.01706	0.005303	0.02236	0.6	0.09564	0.02799	0.1236	1.7379	1.0854	0.2889	1.3743	5/30/2012	6/27/2012	F	Y	2	WG	2	1018	1015	4.4	7.2	10	12.4	14.6	15.3	15.4	16	17.2	17.7	17.5	17.5
1199	0.7263	0.1215	0.07344	0.1949	0.6082	0.04912	0.03799	0.08711	0.4935	0.03549	0.02843	0.06392	0.2065	0.004564	0.00351	0.008073	0.197	0.006387	0.00199	0.008377	0.4251	0.06074	0.01657	0.07731	1.451	0.6766	0.2251	0.9017	6/2/2012	6/24/2012	F	Y	2	WG	2	1017	1015	5.3	8.9	10.9	13.3	14.9	15.7	16.6	17.6	18.4	18.5	19.5	19.5
1103	0.6569	0.09786	0.06648	0.1643	0.5263	0.03806	0.03295	0.07101	0.4992	0.04326	0.03004	0.0733	0.2563	0.008277	0.004874	0.01315	0.2447	0.01273	0.002597	0.01533	0.3993	0.05543	0.01861	0.07405	1.6454	0.7517	0.2547	1.0064	5/1/2012	5/29/2012	F	Y	6	WG	2	671	738	4.8	8	7.9	10.4	12.8	12.7	14.6	15	15.7	16	15.8	16.8
1111	0.7623	0.1605	0.08425	0.2448	0.7276	0.09149	0.06145	0.1529	0.5557	0.05499	0.03594	0.09093	0.272	0.008562	0.007517	0.01608	0.2629	0.01729	0.002753	0.02005	0.4784	0.08578	0.02906	0.1148	1.5868	0.8158	0.2777	1.0935	5/3/2012	5/25/2012	M	Y	6	WG	2	625	739	5.9	9.2	10.9	14.4	17.4	18.2	19.9	20.8	21	22.6	22.6	23
1118	0.7602	0.2012	0.1034	0.3046	0.7259	0.1033	0.07096	0.1743	0.6067	0.07389	0.0478	0.1217	0.303	0.01088	0.00984	0.02072	0.3206	0.02163	0.004081	0.02571	0.563	0.09465	0.02865	0.1233	1.8232	1.0428	0.2884	1.3312	5/3/2012	5/25/2012	M	Y	6	WG	2	625	739	5.3	9	11.7	17.5	22.2	23.3	25.3	26.5	27.2	29.1	29.3	30.6
1158	0.7199	0.1453	0.06497	0.2103	0.6218	0.07409	0.03963	0.1137	0.6136	0.067	0.04368	0.1107	0.2614	0.008121	0.007183	0.0153	0.2905	0.02252	0.002803	0.02532	0.5496	0.106	0.02959	0.1356	1.5495	0.8521	0.24	1.0922	5/25/2012	6/19/2012	M	Y	6	WG	2	625	739	5.6	9.1	11.3	14.7	17.1	17.5	19.4	19.9	21.2	21.7	22.7	23.8
1166	0.6931	0.1151	0.07186	0.187	0.6088	0.05718	0.04644	0.1036	0.5667	0.04888	0.03733	0.08621	0.2531	0.008681	0.005832	0.01451	0.2361	0.01428	0.001774	0.01606	0.5698	0.08374	0.02443	0.1082	1.6001	0.8226	0.2702	1.0928	5/25/2012	6/22/2012	M	Y	6	WG	2	736	738	4.9	8.4	10	12.8	17.4	17.3	18.5	19.4	20.3	21.4	22	22.5
1173	0.6593	0.1145	0.06341	0.1779	0.5903	0.0629	0.04096	0.1039	0.4835	0.04414	0.0345	0.07864	0.2335	0.006939	0.005669	0.01261	0.2594	0.01276	0.00394	0.0167	0.6535	0.08245	0.02791	0.1104	1.5604	0.8662	0.2243	1.0904	5/30/2012	6/27/2012	M	Y	2	WG	2	1018	1015	4.3	7	8.6	10.7	13.3	13.6	14.2	14.9	15.5	15.8	16.2	16.9
1200	0.727	0.1383	0.0928	0.2311	0.5772	0.0501	0.04014	0.09024	0.5345	0.05366	0.03911	0.09278	0.2512	0.008556	0.00566	0.01422	0.2779	0.01645	0.003337	0.01979	0.5362	0.0866	0.0245	0.1111	1.603	0.9508	0.2332	1.184	6/4/2012	6/28/2012	M	Y	2	GW	2	1009	1012	5.5	9.4	10.9	13.5	18	18.4	19	17.8	18.9	18.4	19.1	20.5
1208	0.7141	0.1332	0.08512	0.2184	0.5862	0.04772	0.04122	0.08893	0.5018	0.04666	0.03342	0.08007	0.243	0.006829	0.004813	0.01164	0.2117	0.008027	0.001794	0.009821	0.3859	0.07348	0.01824	0.09171					6/6/2012	6/28/2012	F	Y	2	WG	2	1062	1059	4.7	8.1	9.2	10.6	12.6	14.1	15.4	15.6	16.2	16.1	15.8	16.9
1104	0.6579	0.1344	0.07658	0.211	0.5875	0.06672	0.04528	0.112	0.5061	0.04342	0.03134	0.07476	0.2387	0.006659	0.004989	0.01165	0.2842	0.02022	0.002444	0.02267	0.4658	0.07426	0.02085	0.09511	1.4618	0.7591	0.2078	0.9669	5/1/2012	5/29/2012	M	Y	6	WG	2	671	738	4.5	7.4	7.6	12.4	17.3	18	18.8	19.8	20.1	20.1	20.7	21.6
1112	0.6968	0.1433	0.08537	0.2287	0.5917	0.05909	0.04579	0.1049	0.5775	0.06961	0.04675	0.1164	0.2719	0.01134	0.008347	0.01969	0.2744	0.01508	0.003553	0.01863	0.5212	0.08727	0.03359	0.1209	1.6829	0.9671	0.3103	1.2774	5/3/2012	5/25/2012	F	Y	6	WG	2	625	739	6.1	10.1	11.2	11.6	13.8	15.1	17.9	17.8	19	19.1	19.8	19.3
1119	0.6474	0.1193	0.06203	0.1814	0.5655	0.05295	0.04108	0.09402	0.503	0.053	0.03143	0.08443	0.2714	0.008342	0.007927	0.01627	0.2751	0.01826	0.002786	0.02104	0.4837	0.08237	0.02118	0.1036	1.6675	0.9822	0.2692	1.2513	5/7/2012	6/4/2012	M	Y	6	WG	2	669	739	5.3	8.6	10.8	13.3	14.3	13.7	15.3	17.1	18.6	19.2	19.4	19.2
1159	0.6426	0.1137	0.06814	0.1818	0.5492	0.05955	0.04092	0.1005	0.4771	0.04405	0.03368	0.07773	0.2331	0.007332	0.005191	0.01252	0.2182	0.01025	0.001971	0.01222	0.4189	0.06722	0.02013	0.08735	1.4157	0.7997	0.2197	1.0194	5/25/2012	6/19/2012	F	Y	6	WG	2	625	739	4.8	7.8	9.6	11.7	13.9	14.8	15.8	15.4	16.6	17.6	18.4	18.5
1167	0.7012	0.1191	0.07104	0.1902	0.614	0.05871	0.03769	0.0964	0.5526	0.05977	0.03696	0.09674	0.2794	0.009988	0.005826	0.01581	0.2765	0.01684	0.002795	0.01963	0.4794	0.07448	0.02194	0.09642					5/25/2012	6/22/2012	M	Y	6	WG	2	736	738	4.4	7.8	9.1	10.7	14.7	14.2	14.7	15.6	15.9	19.3	17.1	17.2
1174	0.7245	0.1416	0.0861	0.2277	0.6341	0.07039	0.04869	0.1191	0.5302	0.04806	0.04147	0.08953	0.2633	0.008992	0.005926	0.01492	0.2764	0.01497	0.004649	0.01962	0.5178	0.08623	0.0295	0.1157	1.6376	0.9902	0.2524	1.2427	5/30/2012	6/27/2012	M	Y	2	WG	2	1018	1015	4.5	7.2	9	11.9	16.6	17	17.6	19.1	19.5	19.7	20.5	21.5
1201	0.7014	0.1352	0.07434	0.2095	0.5847	0.0544	0.041	0.09541	0.5183	0.04368	0.03059	0.07427	0.2587	0.008197	0.005503	0.0137	0.2442	0.01076	0.002677	0.01344	0.4055	0.05995	0.01995	0.0799	1.4291	0.7147	0.2025	0.9171	6/4/2012	6/28/2012	F	Y	2	GW	2	1009	1012	5.6	9.9	12.2	14.2	15.3	17.6	18.4	18	19.6	21.2	19.6	20.2
1214	0.6643	0.1093	0.06967	0.179					0.5262	0.04254	0.03004	0.07258	0.268	0.007569	0.006135	0.0137	0.2566	0.01299	0.003071	0.01606	0.5263	0.07555	0.02427	0.09983	1.5441	0.8219	0.2556	1.0775	6/6/2012	7/4/2012	F	Y	6	WG	2	737	738	5.6	9.3	10.6	12.3	15.4	16.5	16.9	18.1	18	20	19.4	19.9
1217	0.6974	0.1307	0.08948	0.2202	0.6276	0.06741	0.04704	0.1145	0.5396	0.05578	0.03781	0.09359	0.2589	0.009125	0.006264	0.01539	0.2804	0.01709	0.003486	0.02058	0.5416	0.08648	0.0257	0.1122	1.6304	0.855	0.2766	1.1316	6/6/2012	7/4/2012	M	Y	6	WG	2	737	738	5.1	9.2	10.4	13.9	17.6	17.8	18.8	19.2	20.2	20.3	21	20.7
1226	0.6834	0.1336	0.07747	0.211	0.5852	0.04575	0.0431	0.08886	0.4856	0.04089	0.03131	0.0722	0.2304	0.006049	0.005861	0.01191	0.2219	0.01024	0.002171	0.01241	0.5131	0.07585	0.01656	0.09241	1.5601	0.7976	0.2488	1.0465	6/8/2012	7/6/2012	F	Y	2	WG	2	1016	1013	5.8	9.4	11.4	15.4	17.4	17.3	18.8	18.9	19.6	20.4	19.1	20.8
1234	0.8165	0.1845	0.106	0.2905	0.7103	0.08021	0.07212	0.1523	0.6421	0.0752	0.04509	0.1203	0.2684	0.009211	0.007247	0.01646	0.2987	0.0151	0.005219	0.02032	0.5488	0.09765	0.02651	0.1242	1.6864	1.0349	0.2763	1.3112	6/10/2012	6/29/2012	M	Y	2	WG	2	1014	1013	5.5	9	10.5	14.7	18.9	19.6	19	19.4	19.7	20.8	22.4	22.8
1241	0.7563	0.1687	0.09759	0.2663	0.6613	0.06262	0.05738	0.12					0.2795	0.008565	0.00783	0.0164	0.2795	0.01724	0.002911	0.02015	0.5371	0.07869	0.02849	0.1072	1.9042	1.2359	0.3358	1.5717	6/14/2012	7/12/2012	F	Y	6	WG	2	668	624	5.8	10.4	11.8	13.6	16.8	16.7	18.6	20.1	20.9	21.1	21.7	21.9
1249	0.675	0.1263	0.06991	0.1962	0.5974	0.06018	0.04383	0.104	0.5488	0.04886	0.03481	0.08367	0.281	0.008985	0.006732	0.01572	0.2756	0.01946	0.00257	0.02203	0.4997	0.08204	0.0245	0.1065	1.5421	0.7915	0.2497	1.0411	6/19/2012	7/17/2012	M	Y	6	WG	2	625	739	5.4	9	11.4	16.1	20.5	20	19.8	20.7	20.9	22.1	22.6	22.7
1257	0.8197	0.1849	0.1056	0.2905	0.7002	0.08551	0.05006	0.1356	0.6015	0.06131	0.04718	0.1085	0.2943	0.01091	0.006696	0.01761	0.3068	0.0213	0.003822	0.02512	0.5303	0.1011	0.0243	0.1254	1.6133	0.8541	0.2576	1.1117	6/21/2012	7/17/2012	M	Y	6	WG	2	671	738	5.8	9.2	12.1	15.9	18.9	20.3	21.5	22.9	23.5	25	24.1	25.2
1265	0.7341	0.1685	0.1002	0.2687	0.5898	0.07228	0.04272	0.115	0.5669	0.06687	0.04601	0.1129	0.2687	0.008666	0.00691	0.01558	0.2711	0.01676	0.003199	0.01996	0.5211	0.115	0.02445	0.1394	1.6129	0.9852	0.2903	1.2755	6/24/2012	7/19/2012	M	Y	6	WG	2	669	739	6.2	10.3	11.4	15.3	17.6	18.5	20.2	20.5	21.2	21.8	22.8	23.1
1273	0.6849	0.1236	0.0861	0.2097	0.5807	0.05006	0.04509	0.09514	0.564	0.05264	0.04003	0.09267	0.2529	0.008021	0.00597	0.01399	0.2488	0.01298	0.002961	0.01595	0.617	0.09355	0.02599	0.1195	1.8509	1.122	0.2818	1.4038	6/28/2012	7/26/2012	F	Y	2	GW	2	1009	1012	5.1	8.7	11.3	13.5	15.8	16	17.4	17.1	17.9	18.5	18.5	19.9
1282	0.6911	0.1313	0.07414	0.2054	0.5933	0.05792	0.03762	0.09554	0.4669	0.03915	0.02563	0.06478	0.2235	0.005732	0.004181	0.009913	0.2428	0.01106	0.002698	0.01376	0.4867	0.07705	0.01831	0.09536	1.5235	0.7369	0.2385	0.9754	6/28/2012	7/23/2012	M	Y	2	WG	2	1062	1059	3.7	7.4	9.7	12.9	14.3	14	15	16.1	16.4	16.4	16.8	18.6
1298	0.8263	0.1779	0.1087	0.2867	0.6412	0.06656	0.05866	0.1252	0.5647	0.0567	0.04188	0.09858	0.2679	0.008989	0.006582	0.01557	0.3202	0.02039	0.005105	0.02549	0.5973	0.09819	0.03673	0.1349	1.5284	0.912	0.23	1.142	6/29/2012	7/26/2012	M	Y	2	WG	2	1014	1013	4.7	7.5	9	12.2	17	19.3	19.2	20.8	21.2	23.5	23.8	24.8
1210	0.6886	0.1264	0.08126	0.2077	0.6073	0.04949	0.04553	0.09502	0.5133	0.04541	0.03408	0.07949	0.257	0.007605	0.005461	0.01307	0.2175	0.01026	0.0022	0.01246	0.4611	0.07107	0.02103	0.0921	1.5525	0.7937	0.249	1.0427	6/6/2012	7/2/2012	F	Y	2	WG	2	1061	1063	5.5	8.7	10.5	12.3	14.4	14.6	16.1	15.8	15.9	16.6	16.7	17.5
1218	0.7385	0.1417	0.09196	0.2337	0.6931	0.08311	0.06049	0.1436	0.5263	0.04787	0.03135	0.07922	0.2527	0.008425	0.006153	0.01458	0.2535	0.01441	0.002797	0.01721	0.5103	0.07777	0.02042	0.09819	1.4607	0.8535	0.2284	1.0819	6/6/2012	7/4/2012	M	Y	6	WG	2	737	738	4.5	8.5	10.1	13.3	17.2	17.6	18.5	19.6	21.1	21.7	21.6	22.6
1235	0.6499	0.1234	0.07105	0.1944	0.5365	0.04595	0.03909	0.08504	0.47	0.04154	0.02954	0.07108	0.2494	0.007558	0.006099	0.01366	0.2662	0.01485	0.003569	0.01841	0.441	0.06415	0.0177	0.08185	1.5562	0.8622	0.224	1.0861	6/10/2012	6/29/2012	F	Y	2	WG	2	1014	1013	5.5	9.2	10.1	16	13.6	15.1	15.4	16.4	17.3	16.7	16.7	18.7
1242	0.6919	0.1146	0.06589	0.1805	0.5306	0.04402	0.03098	0.075	0.5187	0.04534	0.03128	0.07661	0.2598	0.007524	0.006187	0.01371	0.2583	0.01475	0.002327	0.01707	0.4329	0.07445	0.02175	0.0962	1.5195	0.8269	0.2113	1.0382	6/19/2012	7/17/2012	M	Y	6	WG	2	625	739	4.5	8.4	10	13.3	18.8	18.9	20	21	21.8	23.7	21.6	21.7
1250	0.7669	0.1556	0.09652	0.2521	0.6913	0.07874	0.0658	0.1445	0.5665	0.05093	0.04142	0.09235	0.2608	0.008851	0.005954	0.0148	0.2771	0.01948	0.002828	0.02231	0.5716	0.1014	0.03104	0.1325	1.8172	1.0862	0.2942	1.3804	6/21/2012	7/17/2012	M	Y	6	WG	2	671	738	6.5	10.2	12.1	16.8	20.5	20.8	21.7	22.2	22.9	24.5	24.5	25.8
1258	0.6478	0.1137	0.07092	0.1846	0.5689	0.05364	0.04312	0.09677	0.4631	0.04284	0.02893	0.07177	0.2275	0.006442	0.005997	0.01244	0.2327	0.009788	0.003139	0.01293	0.4164	0.06089	0.02407	0.08496	1.5596	0.8655	0.2284	1.0939	6/23/2012	7/20/2012	F	Y	2	WG	2	1017	1015	4.9	7.3	10.3	12.3	14.4	14.6	14.9	14.8	14.5	15	14.7	15.4
1266	0.7896	0.166	0.08264	0.2486	0.7178	0.08084	0.05329	0.1341	0.6175	0.06447	0.04221	0.1067	0.2909	0.008513	0.007892	0.01641	0.246	0.01737	0.002112	0.01948	0.5147	0.1024	0.02937	0.1317	1.5892	0.7991	0.2682	1.0672	6/24/2012	7/19/2012	M	Y	6	WG	2	669	739	5.8	9.6	11.4	15	18.6	19.7	20.7	22.5	24	24.3	24.7	25.2
1274	0.6619	0.1115	0.07578	0.1873	0.5457	0.04542	0.04356	0.08898	0.5507	0.05488	0.042	0.09688	0.294	0.01061	0.008599	0.01921	0.2583	0.01488	0.002882	0.01776	0.5526	0.0746	0.0253	0.0999	1.8922	1.1631	0.2962	1.4593	6/28/2012	7/26/2012	F	Y	2	GW	2	1009	1012	5.3	8.7	10.4	12.3	15.8	15.9	16.5	16.9	17.4	17.7	18.3	19.5
1299	0.5862	0.08876	0.06802	0.1568	0.5577	0.05721	0.04737	0.1046	0.4723	0.0395	0.02778	0.06728	0.2276	0.007017	0.005667	0.01268	0.237	0.01174	0.00392	0.01566	0.4618	0.05976	0.02464	0.0844	1.4251	0.7037	0.2158	0.9195	7/2/2012	7/27/2012	F	Y	2	WG	2	1061	1063	4.6	7.7	12	12.8	14.4	16.3	16.6	16.6	16.3	16.5	16.2	17.3
1219	0.7305	0.1314	0.09674	0.2282	0.6359	0.06806	0.05166	0.1197	0.519	0.04574	0.03566	0.0814	0.2612	0.008394	0.006799	0.01519	0.2738	0.01442	0.003528	0.01795	0.5207	0.08345	0.01968	0.1031	1.5707	0.7637	0.2476	1.0113	6/6/2012	7/4/2012	F	Y	6	WG	2	737	738	4.4	7.7	8.9	11.2	15.2	14.5	15.2	16.6	17.1	17.4	17.6	19
1228	0.6287	0.1106	0.07239	0.183	0.5256	0.04512	0.04144	0.08655	0.5213	0.04954	0.03994	0.08948	0.2533	0.008353	0.006347	0.0147	0.2769	0.01725	0.003397	0.02064					1.3476	0.6539	0.2213	0.8752	6/8/2012	7/6/2012	M	Y	2	WG	2	1016	1013	4.9	8.8	10.3	14.7	17.3	16.7	16.6	17.8	18	17.9	18.6	19.1
1236	0.7271	0.1379	0.08727	0.2252	0.5971	0.05326	0.04646	0.09972	0.5255	0.05277	0.03366	0.08643	0.2615	0.008701	0.006873	0.01557	0.2457	0.01363	0.002529	0.01616	0.4637	0.07968	0.02686	0.1065	1.6738	0.9303	0.2786	1.2089	6/14/2012	7/12/2012	F	Y	6	WG	2	668	624	6.6	10.6	11.9	14.5	16.2	15.3	16.2	17.2	18.2	18.4	18.3	19.7
1243	0.7263	0.1521	0.1088	0.2609	0.6168	0.07855	0.04136	0.1199	0.5782	0.06425	0.04838	0.1126	0.358	0.0173	0.01251	0.02981	0.37745	0.039	0.005492	0.044245	0.5189	0.1082	0.02422	0.1325	1.5514	0.9461	0.2524	1.1985	6/19/2012	7/17/2012	F	Y	6	WG	2	625	739	5.8	9.8	13	15.2	19.4	19.9	20.1	21.2	21.4	22.8	22.5	22.8
1251	0.7613	0.1549	0.09659	0.2515	0.6813	0.0711	0.05615	0.1272	0.6181	0.06161	0.04115	0.1028	0.2646	0.008715	0.006635	0.01535	0.2677	0.01532	0.003379	0.0187	0.5237	0.0883	0.02597	0.1143	1.8179	0.9343	0.3031	1.2373	6/21/2012	7/17/2012	F	Y	6	WG	2	671	738	5.8	9.8	11.9	13.5	15	16.3	17.5	17.9	18.4	18.3	18.5	18.1
1259	0.7083	0.1304	0.07905	0.2094	0.5993	0.06129	0.0424	0.1037	0.5374	0.04535	0.03696	0.0823	0.2508	0.007671	0.006093	0.01376	0.2504	0.01355	0.002637	0.01619	0.4485	0.0728	0.01969	0.09249	1.4123	0.6682	0.2184	0.8866	6/23/2012	7/20/2012	M	Y	2	WG	2	1017	1015	4.8	7.3	9.9	12.5	16.7	16.6	17.8	17.8	19.1	19.5	20.1	20.6
1267	0.8956	0.2107	0.1143	0.325	0.7618	0.09056	0.07308	0.1636	0.6338	0.07128	0.05209	0.1234	0.2666	0.009211	0.006606	0.01582	0.2484	0.01512	0.002413	0.01754	0.7276	0.1305	0.02898	0.1594	1.9293	1.2181	0.2979	1.516	6/24/2012	7/19/2012	F	Y	6	WG	2	669	739	5.8	9.6	12.1	16	17.2	18.7	20.5	20.5	20.8	22	22.5	23.2
1285	0.6295	0.1072	0.06167	0.1689	0.5956	0.05505	0.04333	0.09838	0.4736	0.03935	0.02736	0.0667	0.2176	0.00591	0.004779	0.01069	0.2526	0.01253	0.002545	0.01507	0.4067	0.05763	0.01526	0.07289	1.5446	0.7975	0.2408	1.0383	6/29/2012	7/24/2012	F	Y	6	GW	2	640	655	5	8.5	10.5	12.9	14.6	15.7	14.7	14.7	15.9	16.7	16.6	16.9
1293	0.6498	0.1151	0.07225	0.1873	0.5519	0.04362	0.0407	0.08432	0.4916	0.04437	0.02782	0.07219	0.2433	0.006997	0.005062	0.01206	0.2378	0.01074	0.002652	0.01339	0.4655	0.06388	0.02197	0.08586	1.3738	0.6355	0.1984	0.834	6/29/2012	7/26/2012	M	Y	2	WG	2	1014	1013	3.3	6.4	8.5	12.3	16.9	17.9	18.6	19.4	20.2	21.3	20.9	21.7
1300	0.7954	0.1721	0.1148	0.2869	0.7733	0.1019	0.08046	0.1824	0.5994	0.06849	0.04206	0.1106	0.3031	0.01106	0.007275	0.01833	0.3202	0.01881	0.004992	0.0238	0.5317	0.08223	0.02483	0.1071	1.6715	1.1441	0.263	1.4071	7/2/2012	7/27/2012	M	Y	2	WG	2	1061	1063	5	8.1	14.8	16.4	19	19.1	20.1	20.3	20.8	22	22.3	23.3
1212	0.5919	0.08355	0.05101	0.1346	0.479	0.03284	0.02789	0.06072	0.4295	0.02777	0.01992	0.04769	0.2151	0.004585	0.004445	0.009031	0.2109	0.008697	0.001872	0.01057	0.377	0.05574	0.01347	0.06921	1.2708	0.6205	0.1618	0.7822	6/6/2012	7/2/2012	F	Y	2	WG	2	1061	1063	5.5	9.2	10.4	11.1	13.4	13.3	14.3	13.6	14	14.8	14.5	14.7
1229	0.619	0.1038	0.05635	0.1601	0.5126	0.03987	0.03083	0.07069	0.4636	0.03559	0.02974	0.06533	0.2314	0.006925	0.005872	0.0128	0.235	0.01185	0.003454	0.01531	0.5193	0.07888	0.01614	0.09502	1.4648	0.8227	0.2166	1.0393	6/8/2012	7/6/2012	F	Y	2	WG	2	1016	1013	5.6	9.2	9.8	12.4	14.1	14.3	16.2	16.6	16.1	16.6	16.4	17.7
1244	0.7457	0.1865	0.09638	0.2829	0.7471	0.1136	0.07248	0.186	0.6377	0.08245	0.05561	0.1381	0.3233	0.01353	0.009969	0.0235	0.3338	0.02638	0.003392	0.02977	0.6417	0.1277	0.03781	0.1656	1.5584	0.8485	0.2691	1.1176	6/19/2012	7/17/2012	M	Y	6	WG	2	625	739	5.3	9.8	13	16.4	19.9	21.7	22.8	23.9	24.4	26.2	25.9	26.5
1260	0.7335	0.1405	0.09538	0.2358	0.6101	0.06222	0.0468	0.109	0.5734	0.05624	0.04585	0.1021	0.2576	0.007992	0.007723	0.01571	0.2828	0.01728	0.003498	0.02078	0.5401	0.08494	0.02962	0.1146	1.6867	0.8839	0.2533	1.1371	6/23/2012	7/20/2012	M	Y	2	WG	2	1017	1015	4.8	7.3	9.8	14.2	18.1	18	19.3	19.9	21	21.4	21.4	22.5
1268	0.6467	0.1134	0.05655	0.17	0.5923	0.05834	0.04185	0.1002	0.5248	0.03955	0.03591	0.07546	0.2466	0.006957	0.004901	0.01186	0.2205	0.009481	0.001945	0.01143	0.5469	0.08121	0.01876	0.09998	1.6109	0.8234	0.2517	1.0751	6/24/2012	7/19/2012	F	Y	6	WG	2	669	739	5.5	9.1	10.9	13.2	14.8	15	16.3	16.7	17.8	18	19.4	20.3
1276	0.6479	0.1045	0.06896	0.1734	0.542	0.0428	0.03672	0.07952	0.4496	0.03597	0.0239	0.05987	0.2064	0.004837	0.003626	0.008463	0.2064	0.008241	0.001933	0.01017	0.4067	0.05735	0.01723	0.07457	1.5321	0.9707	0.2168	1.1875	6/28/2012	7/26/2012	F	Y	2	GW	2	1009	1012	4.1	7.4	9.6	13.1	17.8	18.3	18.4	18.8	18.9	18.5	20.1	20
1286	0.8478	0.1698	0.1182	0.288	0.7561	0.08602	0.07321	0.1592	0.657	0.06713	0.04426	0.1114	0.2546	0.008016	0.006708	0.01472	0.2418	0.01261	0.002745	0.01535	0.5826	0.08853	0.03206	0.1206	1.8849	1.0198	0.3024	1.3223	6/29/2012	7/24/2012	F	Y	6	GW	2	640	655	5.3	8.7	10.9	13.3	16.8	18.2	18	19.2	20.5	20.1	20.4	22.5
1294	0.7309	0.1318	0.08695	0.2187	0.5745	0.05202	0.0389	0.09092	0.557	0.04934	0.04051	0.08985	0.2622	0.008889	0.006914	0.0158	0.2672	0.01539	0.003441	0.01883	0.5047	0.07476	0.022	0.09676	1.6361	0.8494	0.2775	1.1269	6/29/2012	7/26/2012	F	Y	2	WG	2	1014	1013	4.4	7.6	9.6	11.7	14.9	15.2	16	16.5	17.9	19.2	18	18.4
1301	0.6393	0.1089	0.06292	0.1718	0.5828	0.05331	0.0416	0.09491	0.4808	0.03714	0.03053	0.06767	0.2296	0.005938	0.005304	0.01124	0.2255	0.01082	0.00221	0.01303	0.4405	0.07129	0.01907	0.09036	1.587	0.8718	0.2358	1.1076	7/2/2012	7/27/2012	M	Y	2	WG	2	1061	1063	4.8	8.5	13	13.8	15.5	15.3	15.4	15.6	16.7	17.6	17.2	18.4
1237	0.8556	0.1673	0.1098	0.2772	0.7164	0.07748	0.06474	0.1422	0.6696	0.07434	0.0508	0.1251	0.3094	0.01135	0.007873	0.01922	0.2727	0.01446	0.003313	0.01777	0.547	0.09893	0.0264	0.1253	1.8279	1.0289	0.3154	1.3443	6/14/2012	7/12/2012	F	Y	6	WG	2	668	624	6	10.3	11.4	13	14.6	14.6	15.9	16.9	18.4	19.8	19.3	20.4
1245	0.8004	0.1625	0.08412	0.2466	0.6458	0.06017	0.05308	0.1132	0.6719	0.07073	0.04459	0.1153	0.2875	0.01044	0.00705	0.01749	0.2727	0.01721	0.002655	0.01987	0.5331	0.1002	0.02505	0.1253	1.6661	0.8477	0.2797	1.1274	6/19/2012	7/17/2012	F	Y	6	WG	2	625	739	5.4	9.3	11.5	13.4	19.3	18.6	19.1	19.1	19	20.4	20.9	22.7
1253	0.7062	0.1323	0.08809	0.2204	0.6082	0.06126	0.04937	0.1106	0.5355	0.04721	0.03781	0.08502	0.2567	0.00638	0.005809	0.01219	0.2425	0.01181	0.002477	0.01429	0.5356	0.07764	0.02081	0.09845	1.6924	0.9618	0.251	1.2128	6/21/2012	7/17/2012	F	Y	6	WG	2	671	738	5.7	9.2	10.7	11.7	13.2	13.7	15.1	16.5	17.5	17.1	17.2	17.6
1261	0.8249	0.1947	0.1152	0.3099	0.6773	0.0809	0.05968	0.1406	0.5357	0.05462	0.03756	0.09217	0.2377	0.007376	0.005464	0.01284	0.3252	0.01773	0.005832	0.02356	0.6204	0.1157	0.03343	0.1491	1.4942	0.8173	0.2219	1.0392	6/23/2012	7/20/2012	M	Y	2	WG	2	1017	1015	4.5	7.4	10.4	13.8	17.5	20.2	21.9	22.6	21.2	22.5	22.9	24
1269	0.6262	0.1078	0.06688	0.1747	0.5855	0.05743	0.04114	0.09857	0.4732	0.03754	0.02641	0.06396	0.2419	0.006522	0.005738	0.01226	0.2145	0.009995	0.002123	0.01212	0.4918	0.06705	0.01745	0.0845	1.3769	0.643	0.2005	0.8435	6/24/2012	7/19/2012	F	Y	6	WG	2	669	739	5.6	9.5	11.8	15.2	16.4	16.5	16.8	17	17.2	18.2	18.4	20.5
1277	0.6199	0.0943	0.06817	0.1625	0.5497	0.04955	0.03683	0.08638	0.4803	0.04136	0.02696	0.06832	0.2337	0.006073	0.00544	0.01151	0.249	0.0111	0.003063	0.01416	0.4153	0.0575	0.01539	0.07288	1.5138	0.8062	0.2099	1.0161	6/28/2012	7/26/2012	F	Y	2	GW	2	1009	1012	4	7.3	9.2	12.2	15	15.1	15.5	16	16.5	17.5	17.6	19.6
1295	0.7122	0.1351	0.08044	0.2155	0.5893	0.05204	0.04388	0.09592					0.242	0.007993	0.006624	0.01462	0.2583	0.01335	0.003499	0.01685					1.6326	0.8196	0.2844	1.104	6/29/2012	7/26/2012	F	Y	2	WG	2	1014	1013	5.2	8.4	10.5	13.9	16.7	17.4	17.3	17.2	18.6	18.8	18.9	19.6
1231	0.6569	0.119	0.08371	0.2027	0.5692	0.06198	0.03685	0.09883	0.5564	0.05918	0.038	0.09719	0.2714	0.009998	0.006928	0.01693	0.2895	0.02095	0.00289	0.02384	0.4978	0.08265	0.02055	0.1032	1.6005	0.8079	0.2569	1.0649	6/9/2012	6/29/2012	M	Y	6	GW	2	640	655	5.9	10.2	11.4	14.4	17	18.6	19	19.6	19.7	19.3	20.3	20.9
1246	0.7744	0.1707	0.09657	0.2673	0.6145	0.07271	0.04454	0.1173	0.5238	0.04692	0.03906	0.08599	0.2632	0.008971	0.006431	0.0154	0.2858	0.02216	0.002843	0.025	0.509	0.08534	0.02818	0.1135	1.3694	0.7333	0.2148	0.9481	6/19/2012	7/17/2012	M	Y	6	WG	2	625	739	5.6	9.4	11.2	15.3	21.1	20.7	21.9	23.2	23.7	24.8	23.5	23.2
1254	0.7475	0.1503	0.08603	0.2363	0.607	0.05283	0.03785	0.09068	0.549	0.04892	0.03403	0.08295	0.2654	0.008077	0.005471	0.01355	0.242	0.01254	0.002361	0.0149	0.4782	0.07074	0.01882	0.08957	1.599	0.7806	0.2552	1.0358	6/21/2012	7/17/2012	F	Y	6	WG	2	671	738	5.4	9	11	13.2	15.1	16.3	17.4	18.3	19.1	18.6	19.6	21
1262	0.6606	0.1034	0.05686	0.1603	0.5355	0.0408	0.03696	0.07776	0.4848	0.03851	0.03016	0.06868	0.2385	0.00598	0.005037	0.01102	0.2525	0.01268	0.002522	0.0152	0.4253	0.06414	0.01792	0.08206	1.6486	0.956	0.2351	1.1912	6/23/2012	7/20/2012	F	Y	2	WG	2	1017	1015	4.8	7.3	9.2	10	12.2	12.8	13.5	14.1	13.4	13.8	13.7	14.6
1270	0.7821	0.1785	0.09911	0.2776	0.638	0.06651	0.0562	0.1227	0.564	0.05777	0.03834	0.09611	0.2681	0.007924	0.007147	0.01507	0.2666	0.01731	0.002265	0.01957	0.4364	0.06973	0.02066	0.09039	1.534	0.825	0.2514	1.0763	6/24/2012	7/19/2012	F	Y	6	WG	2	669	739	5.8	9.5	11.9	15.2	17	16.5	17.5	17.8	18.7	19	19.7	22
1288	0.7338	0.1532	0.08773	0.241	0.6743	0.06386	0.05157	0.1154	0.5892	0.05885	0.0423	0.1012	0.2873	0.01007	0.00719	0.01726	0.265	0.015	0.002707	0.01771	0.5475	0.08772	0.02797	0.1157	1.6486	0.883	0.2696	1.1526	6/29/2012	7/24/2012	F	Y	6	GW	2	640	655	5.3	8.7	10.4	14.3	17.7	18.1	17.8	18.2	19.7	21.4	20.2	20.8
1303	0.6248	0.1038	0.06219	0.166	0.5377	0.04449	0.03636	0.08085	0.449	0.03212	0.02146	0.05358	0.2474	0.007771	0.006035	0.01381	0.2474	0.01187	0.003243	0.01511	0.5396	0.07404	0.02652	0.1006	1.3495	0.6601	0.2035	0.8637	7/2/2012	7/27/2012	M	Y	2	WG	2	1061	1063	4.6	8.3	13.6	14.9	17.1	17.3	17.1	17.1	17.9	18.8	19.1	19.9
1232	0.8417	0.1901	0.1125	0.3026	0.7347	0.0847	0.08366	0.1684	0.6506	0.07401	0.05084	0.1248	0.3046	0.01316	0.007989	0.02115	0.2617	0.01572	0.002533	0.01825	0.5995	0.1129	0.03034	0.1432	1.8038	1.0203	0.3152	1.3355	6/9/2012	6/29/2012	F	Y	6	GW	2	640	655	7.1	11.8	14.2	16	18.4	18	19.7	20.3	21.1	22.2	22.9	24.6
1239	0.7891	0.1479	0.08514	0.2331	0.649	0.06585	0.04787	0.1137	0.5539	0.04826	0.03627	0.08453	0.2592	0.008857	0.00594	0.0148	0.2173	0.0102	0.0021	0.0123	0.536	0.08088	0.01903	0.09991	1.623	0.853	0.2435	1.0966	6/14/2012	7/12/2012	F	Y	6	WG	2	668	624	5.8	10.3	11.9	14.1	15.9	15.8	16.9	17.6	17.4	17.8	18.7	19.1
1247	0.639	0.1254	0.07109	0.1965	0.5647	0.06332	0.04261	0.1059	0.5941	0.06928	0.04724	0.1165	0.2597	0.0107	0.0078	0.0185	0.2823	0.02038	0.003486	0.02387	0.6167	0.104	0.02998	0.1339	1.6892	1.1278	0.2612	1.3889	6/19/2012	7/17/2012	M	Y	6	WG	2	625	739	6	10	12.2	14.7	20.4	20	20.5	21.9	22.2	23.3	23.7	24.4
1255	0.7907	0.1719	0.1113	0.2833	0.6603	0.08019	0.05422	0.1344	0.6286	0.07279	0.05429	0.1271	0.2761	0.008403	0.006714	0.01512	0.3218	0.02515	0.003452	0.0286	0.5833	0.09342	0.02682	0.1202	1.859	1.0658	0.3152	1.381	6/21/2012	7/17/2012	F	Y	6	WG	2	671	738	5.4	8.8	11	13	14.9	16.2	16.7	18.1	17.7	18.6	18.9	21.5
1271	0.7923	0.1584	0.09049	0.2489	0.6835	0.06485	0.05189	0.1167	0.5464	0.05098	0.03165	0.08262	0.2715	0.008953	0.006063	0.01502	0.2099	0.008939	0.001902	0.01084	0.4856	0.06881	0.02557	0.09438	1.6525	0.811	0.2748	1.0857	6/24/2012	7/19/2012	F	Y	6	WG	2	669	739	6	9.8	12.7	15.9	17.3	16.8	18.2	19.7	21.1	20.9	22.6	24.1
1289	0.7115	0.1608	0.0778	0.2386	0.6056	0.06078	0.04017	0.101	0.4972	0.04262	0.02864	0.07126	0.2221	0.005826	0.004651	0.01048	0.2283	0.01323	0.002136	0.01537	0.4515	0.06206	0.02225	0.08431	1.3176	0.7397	0.1971	0.9368	6/29/2012	7/24/2012	M	Y	6	GW	2	640	655	4.6	8	10.5	15.4	18.4	19.6	20.3	21.6	22.4	22.9	22.9	23.4
1296	0.6184	0.1044	0.06843	0.1728	0.5503	0.05122	0.04349	0.09472	0.5206	0.04931	0.0319	0.08121	0.2411	0.007743	0.00599	0.01373	0.242	0.01318	0.003289	0.01647	0.5645	0.07794	0.02211	0.1	1.6213	0.8756	0.2485	1.1241	6/29/2012	7/26/2012	M	Y	2	WG	2	1014	1013	4.6	7.5	9.8	12.9	15.6	16.6	17	17.7	17.8	19	19	19.8
1304	0.686	0.1202	0.07131	0.1915	0.5929	0.05661	0.03728	0.0939	0.4944	0.0371	0.02997	0.06707	0.2494	0.007788	0.006168	0.01396	0.2456	0.01298	0.002531	0.01551	0.4674	0.07747	0.01765	0.09512	1.4193	0.774	0.2116	0.9857	7/2/2012	7/27/2012	M	Y	2	WG	2	1061	1063	5.1	8.7	12.5		17.7	17.4	18	18.3	18.8	20	19.9	21
1216	0.6987	0.1216	0.07717	0.1988	0.5777	0.04865	0.04458	0.09323	0.5594	0.0526	0.03458	0.08718	0.2726	0.007965	0.006575	0.01454	0.2726	0.01321	0.003716	0.01693	0.4933	0.08031	0.02163	0.1019	1.5313	0.7456	0.2416	0.9873	6/6/2012	7/4/2012	F	Y	6	WG	2	737	738	4.7	8.2	9.3	11.4	14.3	13.9	14.2	15.3	14.7	15.6	15.9	16.1
1233	0.8144	0.1658	0.1013	0.2672	0.6074	0.05751	0.04804	0.1055	0.5798	0.05586	0.04141	0.09726	0.2796	0.009644	0.006427	0.01607	0.2965	0.01804	0.003817	0.02186	0.5801	0.1021	0.02876	0.1309	1.3381	0.719	0.1894	0.9084	6/10/2012	6/29/2012	M	Y	2	WG	2	1014	1013	4.6	8	8.9	12.6	15.4	17	17.4	17.7	19	21.2	23	23.1
1240	0.7288	0.1521	0.08506	0.2372	0.6143	0.05065	0.03885	0.0895	0.5345	0.05122	0.03897	0.09019	0.2857	0.009727	0.007029	0.01676	0.2852	0.01776	0.003233	0.02099	0.5399	0.08678	0.02548	0.1123	1.6718	0.9745	0.2799	1.2544	6/14/2012	7/12/2012	F	Y	6	WG	2	668	624	6.2	10.2	11.7	13.4	15.2	15.3	16.5	16.9	18.8	17.5	18.4	19.1
1248	0.7524	0.1427	0.1006	0.2433	0.6573	0.06939	0.06065	0.13	0.5702	0.05854	0.04011	0.09864	0.2648	0.00925	0.006503	0.01575	0.2628	0.01366	0.003265	0.01692	0.4662	0.07807	0.02132	0.09939	2.1776	1.398	0.3756	1.7333	6/19/2012	7/17/2012	F	Y	6	WG	2	625	739	5	9.1	11.1	13.5	19.4	18.5	18.5	19	18.9	19.9	20.9	21
1256	0.775	0.1624	0.0961	0.2585	0.657	0.06144	0.0563	0.1177	0.52	0.0443	0.03077	0.07507	0.2684	0.008273	0.006173	0.01445	0.2506	0.01396	0.002645	0.0166	0.4507	0.06987	0.02046	0.09033	1.526	0.8567	0.2438	1.1005	6/21/2012	7/17/2012	F	Y	6	WG	2	671	738	5.3	8.7	10.8	13.6	16.1	16.1	17.2	18	18.4	18.9	19.9	21.4
1264	0.663	0.1074	0.0792	0.1866	0.5642	0.04754	0.04352	0.09106	0.4941	0.04718	0.03251	0.07968	0.2475	0.008663	0.00615	0.01481	0.2543	0.01288	0.004725	0.0176	0.5081	0.06677	0.02575	0.09253	1.643	0.9777	0.247	1.2247	6/23/2012	7/20/2012	F	Y	2	WG	2	1017	1015	4.6	7.1	9.7	11.8	14.3	15.2	15.6	16.3	16.4	17.5	18.2	17.8
1272	0.8691	0.2153	0.1152	0.3305	0.6931	0.08661	0.05773	0.1443	0.6321	0.0764	0.05029	0.1267	0.3076	0.0109	0.008439	0.01934	0.2968	0.01791	0.003392	0.0213	0.5544	0.1071	0.02679	0.1338	1.6359	0.9796	0.266	1.2456	6/24/2012	7/19/2012	M	Y	6	WG	2	669	739	6.1	9.9	11.6	15.6	19	18.5	20	21.2	22.7	23.3	23.3	24.2
1281	0.6593	0.1398	0.08401	0.2238	0.5346	0.04736	0.03656	0.08393	0.4911	0.04946	0.03383	0.08329	0.2354	0.006259	0.005544	0.0118	0.301	0.01786	0.004727	0.02259	0.4465	0.06541	0.02246	0.08787	1.5043	0.7846	0.2529	1.0375	6/28/2012	7/23/2012	M	Y	2	WG	2	1062	1059	4.4	8.8	9.8	14.3	16	16.6	17.6	18.3	18.2	18.2	17.7	19.9
1290	0.7085	0.1225	0.0858	0.2083	0.6066	0.05347	0.04957	0.103	0.5338	0.0519	0.0351	0.08699	0.2686	0.008261	0.006708	0.01497	0.2422	0.01047	0.002438	0.01291	0.4514	0.0653	0.01814	0.08345	1.6696	0.8513	0.2709	1.1222	6/29/2012	7/24/2012	F	Y	6	GW	2	640	655	5.4	8.9	10.6	13.1	16.3	17.4	16.3	16.2	18.1	19.3	17.6	18.2
1309	0.8136	0.1844	0.1002	0.2846	0.6783	0.07696	0.04745	0.1244	0.587	0.05862	0.0419	0.1005	0.2817	0.009398	0.005892	0.01529	0.2728	0.01468	0.003058	0.01774	0.5543	0.1065	0.02381	0.1303	1.6337	0.9282	0.2367	1.1649	7/5/2012	7/28/2012	M	Y	2	GW	2	1082	1080	4.7	8.2	10.4	14.3	16.9	18.1	18.9	19.8	19.6	20.5	21.6	22.4
1317	0.7164	0.1425	0.09153	0.234	0.5878	0.05548	0.04809	0.1036	0.5622	0.05911	0.04307	0.1022	0.293	0.01082	0.007165	0.01798	0.2688	0.01462	0.003302	0.01792	0.5452	0.09305	0.03	0.123	1.8078	1.0511	0.3003	1.3514	7/5/2012	7/27/2012	F	Y	2	GW	2	1084	1081	6.5	11.1	13.8	17.4	19.8	20.9	20.1	20.5	20.5	20.5	22.9	22.3
1325	0.8347	0.1709	0.09242	0.2633	0.5806	0.05072	0.04126	0.09198	0.5448	0.04941	0.03671	0.08612	0.2625	0.006938	0.005454	0.01239	0.3036	0.01626	0.004122	0.02038	0.5733	0.08562	0.02314	0.1088	1.626	0.9103	0.2419	1.1522	7/12/2012	8/9/2012	M	Y	2	GW	2	1011	1012	4.6	8.4	9.9	14.8	16.8	18.4	19.4	21.1	22.3	24.3	23.7	24.3
1333	0.8378	0.1994	0.1112	0.3106	0.7184	0.07447	0.05929	0.1338	0.551	0.05657	0.03785	0.09443	0.2902	0.01002	0.007542	0.01757	0.2401	0.01216	0.002355	0.01452	0.4808	0.07946	0.02364	0.1031	1.7197	0.9299	0.2897	1.2196	7/17/2012	8/14/2012	F	Y	6	WG	2	671	738	5.5		10.8	15.7	17.5	17.2	19.7	20	20.5	21	21.2	22.1
1350	0.706	0.1618	0.09903	0.2609	0.6906	0.09345	0.06129	0.1547	0.5474	0.06327	0.0436	0.1069	0.2581	0.008558	0.006744	0.0153	0.2488	0.01574	0.002293	0.01804	0.5096	0.09844	0.02557	0.124	1.7588	1.1036	0.3012	1.4048	7/18/2012	8/15/2012	M	Y	6	WG	2	669	739	5.7	12	15.1	19.4	23.5	23.1	22.5	22.8	22.6	23.7	23.2	23.3
1358	0.6997	0.1372	0.08822	0.2255	0.6126	0.06503	0.04987	0.1149	0.5216	0.04995	0.03536	0.08532	0.2407	0.007003	0.006276	0.01328	0.2589	0.01512	0.003083	0.0182	0.5101	0.08023	0.02349	0.1037	1.453	0.8239	0.2296	1.0535	7/20/2012	8/17/2012	M	Y	2	WG	2	1017	1015	4.4	7.9	10.7	15.2	16.7	17.4	18	19.1	19.3	19.9	20.4	20.5
1366	0.6921	0.1149	0.07318	0.1881	0.5827	0.04404	0.03806	0.0821	0.5027	0.04962	0.02842	0.07804	0.2539	0.00725	0.005147	0.0124	0.2501	0.01307	0.002466	0.01553	0.4264	0.06712	0.01704	0.08417	1.5428	0.8308	0.2181	1.0489	7/23/2012	8/20/2012	F	Y	6	GW	2	640	655	4.7	7.1	10	13.8	15.9	15	15.3	14.9	15.6	15.7	15.8	15.7
1372	0.5356	0.08128	0.04328	0.1246	0.4902	0.03874	0.03086	0.0696	0.4825	0.04046	0.02712	0.06759	0.2459	0.007455	0.006071	0.01353	0.2345	0.01278	0.00243	0.01521	0.4734	0.06645	0.01752	0.08396					7/23/2012	8/14/2012	F	Y	2	WG	2	1062	1059	5	8.4	10.6	11.9	12.6	13	14.2	14.2	14.8	15.2	14.8	14.9
1388	0.9301	0.2336	0.1488	0.3824	0.727	0.09761	0.06823	0.1658	0.6284	0.07746	0.05119	0.1287	0.331	0.01479	0.01032	0.02512	0.3226	0.0263	0.004128	0.03042	0.6351	0.1294	0.03925	0.1687	1.7816	1.3683	0.3258	1.6942	7/26/2012	8/17/2012	M	Y	2	GW	2	1084	1081	6	10.3	12.7	18.7	22.2	22.3	23.8	25.2	28	26.5	26.6	26.4
1395	0.6848	0.1371	0.08728	0.2243	0.6031	0.06935	0.05044	0.1198	0.542	0.05663	0.04308	0.0997	0.245	0.008497	0.006467	0.01496	0.2836	0.01743	0.004964	0.0224	0.5283	0.09367	0.02716	0.1208	1.6285	1.0071	0.2642	1.2714	7/27/2012	8/21/2012	M	Y	2	WG	2	1061	1063	5.9	9.7	13.2	16.5	19.2	18.9	19.5	19.6	20	20.2	19.3	20.3
1310	0.7475	0.1354	0.08845	0.2238	0.6772	0.06825	0.05717	0.1254	0.5456	0.04545	0.03347	0.07892	0.2651	0.007815	0.005659	0.01347	0.275	0.01407	0.003342	0.01741	0.5257	0.09612	0.01857	0.1147	1.6035	0.7703	0.2295	0.9998	7/5/2012	7/28/2012	F	Y	2	GW	2	1082	1080	5.1	8.7	11	12.9	13.4	14.1	15.3	14.6	15.3	16	16.8	17
1318	0.718	0.1356	0.08214	0.2177	0.5819	0.04878	0.04463	0.09341	0.5289	0.04821	0.0389	0.08711	0.2704	0.007958	0.006443	0.0144	0.2398	0.01072	0.00239	0.01311	0.4665	0.06979	0.01769	0.08749	1.634	0.7981	0.2702	1.0683	7/10/2012	8/6/2012	F	Y	2	GW	2	1010	1012	4.7	7.9	10.3	12.9	13.2	14.3	15.5	15.7	16.1	16.2	16.4	17.3
1326	0.6755	0.118	0.07102	0.1891	0.5615	0.04573	0.03678	0.0825	0.5137	0.04498	0.03195	0.07692	0.2566	0.006902	0.005921	0.01282	0.2668	0.01261	0.003586	0.0162	0.4783	0.07111	0.01779	0.08889	1.5916	0.7567	0.2493	1.006	7/12/2012	8/9/2012	F	Y	2	GW	2	1011	1012	5.2	8.9	11.1	15.3	17.3	17.6	19.1	18.3	20.5	20.9	21.2	21.2
1334	0.6637	0.1236	0.077	0.2006	0.5969	0.05922	0.04497	0.1042	0.5035	0.05293	0.03733	0.09026	0.2468	0.009247	0.005652	0.0149	0.2481	0.01448	0.00245	0.01693	0.4487	0.07243	0.02476	0.09719	1.6461	0.9066	0.2805	1.1872	7/17/2012	8/14/2012	F	Y	6	WG	2	671	738	5.3		10.7	14.9	15.7	15.3	16.7	17.5	18.4	18.8	18.5	19
1342	0.5946	0.08797	0.06169	0.1497	0.5273	0.04393	0.03991	0.08384	0.4125	0.03201	0.02402	0.05603	0.2206	0.006391	0.005097	0.01149	0.2292	0.009722	0.00417	0.01389	0.4308	0.06686	0.02029	0.08715	1.3409	0.6801	0.1717	0.8518	7/17/2012	8/7/2012	F	Y	2	WG	2	1018	1015	5.1	8.7	11.2	12.2	13.4	14.8	14.2	14.7	14.9	14.9	15.2	15.2
1351	0.6704	0.109	0.07329	0.1823	0.5491	0.04278	0.03724	0.08002	0.5343	0.05061	0.03891	0.08952	0.2529	0.00764	0.006704	0.01434	0.2642	0.01415	0.003072	0.01722	0.4823	0.0676	0.0204	0.088	1.4748	0.808	0.2166	1.0247	7/20/2012	8/17/2012	F	Y	2	WG	2	1017	1015	4.8	8	10.1	11.8	13.1	14.1	14.2	14.4	15.1	15.6	15.4	15.4
1359	0.5986	0.08749	0.06533	0.1528	0.5225	0.04647	0.03643	0.0829	0.4448	0.03716	0.02739	0.06455	0.2091	0.005996	0.00413	0.01013	0.2052	0.009875	0.001827	0.0117	0.4175	0.05582	0.0169	0.07272	1.4173	0.772	0.2037	0.9757	7/23/2012	8/20/2012	F	Y	6	GW	2	640	655	4.6	6.8	9.1	11.1	13.5	13.1	13.9	13.7	14.5	15	15.1	16.2
1373	0.7082	0.158	0.08404	0.2421	0.6106	0.06849	0.04696	0.1154	0.542	0.05799	0.03983	0.09782	0.2474	0.007611	0.005974	0.01359	0.2601	0.01481	0.003105	0.01792	0.5233	0.09131	0.02695	0.1183	1.3605	0.6562	0.2277	0.8839	7/23/2012	8/14/2012	M	Y	2	WG	2	1062	1059	5	9	12.2	15.3	16.9	17.7	18.2	18.9	19.7	20.5	20.1	19.7
1381	0.6109	0.08639	0.06346	0.1498	0.5174	0.03738	0.03559	0.07297	0.4883	0.0391	0.02734	0.06644	0.2152	0.006229	0.003752	0.009981	0.2342	0.01188	0.001941	0.01382	0.463	0.06603	0.01692	0.08295	1.6264	0.8149	0.2548	1.0697	7/26/2012	8/23/2012	F	Y	6	WG	2	737	738	5.1	8.2	10.5	12.1	13.5	13.6	14.4	14.8	15.1	16.5	15.4	16.4
1389	0.9767	0.2531	0.1498	0.4029	0.7152	0.09067	0.06705	0.1577	0.6734	0.07839	0.04178	0.1202	0.3351	0.01509	0.00978	0.02487	0.3567	0.02892	0.004428	0.03335	0.6565	0.1054	0.0361	0.1415	1.744	0.9765	0.283	1.2595	7/26/2012	8/17/2012	M	Y	2	GW	2	1084	1081	5.3	9.8	11.1	16.2	19.7	18.7	20	20.1	20.1	20.4	21.3	22.1
1396	0.717	0.1528	0.09178	0.2445	0.5863	0.06447	0.04107	0.1055	0.5113	0.05166	0.03597	0.08762	0.2511	0.008167	0.007121	0.01529	0.2644	0.01464	0.00403	0.01867	0.5562	0.09953	0.02888	0.1284	1.5071	0.8161	0.2332	1.0493	7/27/2012	8/21/2012	M	Y	2	WG	2	1061	1063	5.9	9.3	12.1	15.2	17.5	18.1	18.2	18.1	18.9	18.9	18.4	19.7
1311	0.8027	0.1632	0.1069	0.2701	0.6196	0.06592	0.04408	0.11	0.5	0.04538	0.03445	0.07983	0.2303	0.006491	0.004926	0.01142	0.2825	0.01614	0.003079	0.01921	0.4931	0.08671	0.02181	0.1085	1.538	0.9332	0.2058	1.139	7/5/2012	7/28/2012	M	Y	2	GW	2	1082	1080	4.6	8.5	11.9	15.9	18	19.1	19.8	19.9	19.3	20.6	20.6	21.6
1319	0.6917	0.1181	0.07466	0.1928	0.6627	0.06912	0.05198	0.1211	0.5309	0.05057	0.0356	0.08617	0.2547	0.007247	0.005865	0.01311	0.2889	0.01876	0.003681	0.02244	0.5584	0.0816	0.02288	0.1045	1.4097	0.7115	0.1793	0.8908	7/10/2012	8/6/2012	M	Y	2	GW	2	1010	1012	4.1	7.4	10.1	13.8	16.8	17	17.9	18.9	19.1	20.6	20.1	20.7
1327	0.772	0.1456	0.08861	0.2342	0.6241	0.05593	0.04511	0.101	0.5946	0.05509	0.04088	0.09596	0.2769	0.008076	0.006071	0.01415	0.278	0.01473	0.003114	0.01785	0.5329	0.08205	0.02653	0.1086	1.7542	0.9691	0.2696	1.2387	7/12/2012	8/9/2012	M	Y	2	GW	2	1011	1012	4.3	8	9.9	15.1	17.6	17.2	19.1	20.2	21.8	24.3	24.5	25.2
1343	0.5431	0.09163	0.05622	0.1478	0.4642	0.0349	0.03058	0.06548	0.3974	0.03235	0.02369	0.05605	0.2096	0.005784	0.003961	0.009746	0.201	0.008146	0.002286	0.01043	0.3272	0.04369	0.01147	0.05516	1.4746	0.7925	0.2107	1.0032	7/17/2012	8/7/2012	F	Y	2	WG	2	1018	1015	5.1	8.8	11.1	12.1	13.2	15	14.6	14.8	15.2	15.6	16.1	16.3
1352	0.6204	0.1034	0.06735	0.1707	0.522	0.04541	0.04084	0.08625	0.5158	0.04705	0.03329	0.08034	0.256	0.007373	0.006564	0.01394	0.2585	0.0128	0.003291	0.01609	0.4773	0.06693	0.02471	0.09164	1.4841	0.8244	0.2237	1.048	7/20/2012	8/17/2012	F	Y	2	WG	2	1017	1015	4.5	7.9	9.6	11.8	14.4	15.1	15.8	16.5	16.6	17.1	16.9	17.6
1360	0.6505	0.1131	0.07282	0.1859	0.5192	0.04972	0.03521	0.08493	0.4317	0.03633	0.02726	0.06359	0.2096	0.005616	0.004967	0.01058	0.1965	0.008509	0.002101	0.01061	0.4089	0.0591	0.01873	0.07784	1.3415	0.7045	0.1898	0.8943	7/23/2012	8/20/2012	F	Y	6	GW	2	640	655	5.3	8.3	12.1	14.4	15.4	15.5	16	15.7	16.8	16.8	17.3	17.4
1374	0.6227	0.1051	0.07251	0.1777	0.5306	0.04045	0.03737	0.07782	0.4624	0.03465	0.02958	0.06423	0.2535	0.008791	0.006553	0.01534	0.2523	0.01151	0.003226	0.01474	0.4415	0.06492	0.0132	0.07813	1.4976	0.8171	0.2215	1.0386	7/23/2012	8/14/2012	F	Y	2	WG	2	1062	1059	5.1	8.2	10.8	12.8	13.3	14	13.9	13.8	14.7	15.3	15.1	15.4
1382	0.7763	0.1457	0.09401	0.2397	0.7332	0.0976	0.07303	0.1706	0.5719	0.06077	0.0367	0.09747	0.2738	0.009767	0.006446	0.01621	0.2504	0.01199	0.003038	0.01502	0.5669	0.08887	0.02356	0.1124	1.7447	0.9915	0.2836	1.2751	7/26/2012	8/23/2012	M	Y	6	WG	2	737	738	6.6	9.6	12	15.2	20.2	20.1	22.3	21.9	22.1	22.8	22.3	24.7
1397	0.7615	0.1603	0.106	0.2663	0.6856	0.08521	0.06435	0.1496	0.5824	0.06588	0.04532	0.1112	0.2382	0.007488	0.005922	0.01341	0.2875	0.01924	0.003644	0.02288	0.5274	0.09106	0.02603	0.1171	1.6017	0.8182	0.2525	1.0707	7/27/2012	8/21/2012	M	Y	2	WG	2	1061	1063	6.1	9.6	12.9	15.8	17.9	18.8	20.8	21.5	22.1	22.6	22.1	22.9
1312	0.7252	0.1241	0.08638	0.2105	0.5458	0.042	0.0395	0.0815	0.562	0.05644	0.03354	0.08998	0.2858	0.008103	0.007292	0.0154	0.2557	0.0116	0.002693	0.0143	0.4637	0.06764	0.0179	0.08554	1.8587	1.0091	0.3087	1.3178	7/5/2012	7/28/2012	F	Y	2	GW	2	1082	1080	4.8	7.9	10.4	13.1	14.5	14.8	15.1	15.9	16.5	16.8	17.8	18.2
1320	0.8667	0.1977	0.1153	0.313	0.7042	0.07582	0.06272	0.1385	0.6598	0.07731	0.0454	0.1227	0.2733	0.009151	0.006175	0.01533	0.2733	0.0157	0.003159	0.01886	0.652	0.09035	0.02685	0.1172	2.0035	1.2446	0.2938	1.5383	7/10/2012	8/6/2012	M	Y	2	GW	2	1010	1012	4.9	8.5	11.3	15.7	18.5	18.8	19.9	20.1	21	22.1	21.6	22.2
1344	0.6127	0.1098	0.06599	0.1758	0.5385	0.04482	0.03608	0.08091	0.4483	0.03778	0.0272	0.06497	0.2387	0.006917	0.005467	0.01238	0.2792	0.01664	0.004197	0.02084	0.4619	0.07273	0.02217	0.0949	1.4503	0.8713	0.2399	1.1111	7/17/2012	8/7/2012	M	Y	2	WG	2	1018	1015	5.5	9.2	12	14.2	17.4	17.4	17.6	19	18.6	18.9	18.7	19.7
1353	0.6935	0.1267	0.07615	0.2028	0.5604	0.04842	0.03961	0.08803	0.5283	0.04332	0.02863	0.07196	0.2372	0.007598	0.004286	0.01188	0.2595	0.01223	0.003698	0.01593	0.4871	0.07786	0.02139	0.09925	1.3984	0.7095	0.1912	0.9006	7/20/2012	8/17/2012	M	Y	2	WG	2	1017	1015	4.5	7.7	9.9	15.2	18.6	19.8	20.1	21.1	20.8	20.9	20.6	20.1
1361	0.5592	0.07504	0.0498	0.1248	0.4878	0.03514	0.03211	0.06725	0.4342	0.03227	0.02557	0.05784	0.2318	0.006704	0.005204	0.01191	0.2437	0.01278	0.002014	0.01479	0.4414	0.06636	0.0177	0.08406	1.4343	0.6519	0.2236	0.8755	7/23/2012	8/20/2012	M	Y	6	GW	2	640	655	3.7	6.4	9.1	12.1	14.6	14.9	15.3	15.4	16	16.7	16	15.8
1367	0.6733	0.1266	0.07457	0.2011	0.5918	0.05647	0.04447	0.1009	0.5146	0.04668	0.03601	0.08269	0.2583	0.007609	0.006541	0.01415	0.2611	0.0154	0.002344	0.01775	0.4645	0.07456	0.02505	0.09962	1.5653	0.8487	0.2557	1.1044	7/23/2012	8/20/2012	M	Y	6	GW	2	640	655	5.1	8	11.4	14.9	16.4	17.3	18.8	19.7	20.1	20.9	20.6	20.6
1375	0.736	0.1573	0.1005	0.2578	0.6137	0.06511	0.05259	0.1177	0.6016	0.06267	0.05389	0.1166	0.2644	0.008827	0.006759	0.01559	0.299	0.01823	0.004468	0.0227	0.5745	0.1036	0.03582	0.1394	1.4645	0.785	0.2275	1.0124	7/23/2012	8/14/2012	M	Y	2	WG	2	1062	1059	5.2	8.7	11.6	14.2	15.8	17.2	18.5	19.3	21	21.2	20.8	20.5
1383	0.6361	0.09628	0.06534	0.1616	0.5782	0.0463	0.03452	0.08082	0.5246	0.04735	0.0329	0.08024	0.2425	0.007605	0.004465	0.01207	0.2581	0.0139	0.002478	0.01638	0.4704	0.06315	0.01919	0.08234	1.7035	0.8651	0.2832	1.1483	7/26/2012	8/23/2012	F	Y	6	WG	2	737	738	5.7	9	11.3	12.7	14.5	15	15.5	16.5	16.4	16.8	16.4	17.4
1391	0.6982	0.1223	0.07376	0.1961	0.5549	0.04114	0.03948	0.08062	0.5021	0.04146	0.02993	0.07139	0.2372	0.006375	0.005959	0.01233	0.2289	0.01121	0.001939	0.01315	0.4548	0.07238	0.02815	0.1005	1.461	0.7999	0.2307	1.0306	7/26/2012	8/23/2012	F	Y	2	WG	2	1014	1013	5	8.7	10.6	12.5	14.8	15.3	16	16.9	16.4	18.5	17.7	18.3
1398	0.6162	0.1123	0.06312	0.1755	0.561	0.05146	0.04105	0.0925	0.4842	0.04295	0.03041	0.07336	0.2519	0.007012	0.006796	0.01381	0.2372	0.01405	0.002234	0.01629	0.4423	0.06945	0.02309	0.09253	1.4659	0.7232	0.2207	0.944	7/27/2012	8/21/2012	M	Y	2	WG	2	1061	1063	5.2	8.8	11.4	14.1	16.7	17.1	17.9	20.1	20.5	20.2	20.2	21.3
1313	0.7233	0.1203	0.07509	0.1954	0.6074	0.05143	0.0507	0.1021	0.4639	0.03088	0.02504	0.05592	0.2634	0.008378	0.005214	0.01359	0.2479	0.01158	0.002771	0.01435	0.5014	0.0736	0.02136	0.09497	1.4337	0.775	0.157	0.932	7/5/2012	7/28/2012	F	Y	2	GW	2	1082	1080	5.1	8.3	10.9		13.1	14.4	15.1	15.4	15.8	16.2	15.9	17.4
1321	0.6081	0.09036	0.05902	0.1494	0.4854	0.03758	0.02508	0.06266	0.4629	0.03419	0.02296	0.05715	0.2154	0.005005	0.003771	0.008775	0.2409	0.01221	0.002243	0.01445	0.4994	0.0628	0.02197	0.08477	1.4815	0.7872	0.2036	0.9908	7/10/2012	8/6/2012	F	Y	2	GW	2	1010	1012	4.5	7.9	10.3	12.3	14	15.2	16.1	16.8	18.6	19	17.9	19.8
1329	0.7469	0.1475	0.09749	0.2449	0.5765	0.04444	0.03942	0.08387	0.5564	0.05328	0.03642	0.0897	0.2635	0.007319	0.006143	0.01346	0.2561	0.01284	0.002574	0.01541	0.5158	0.07599	0.02623	0.1022	1.9189	1.088	0.2738	1.3618	7/12/2012	8/9/2012	F	Y	2	GW	2	1011	1012	4.8	9.1	11.6	15.5	17.3	17.2	17.6	19	20.3	20.6	20.3	20.3
1345	0.7517	0.1548	0.07944	0.2342	0.6284	0.06514	0.04397	0.1091	0.481	0.03998	0.02465	0.06463	0.2343	0.006357	0.004318	0.01067	0.2305	0.01143	0.002803	0.01424	0.4913	0.08133	0.02238	0.1037	1.5335	0.8383	0.233	1.0713	7/17/2012	8/7/2012	M	Y	2	WG	2	1018	1015	4.8	8.5	10.6	12.3	15.2	15.8	17.2	19	19.7	20.8	21.3	21.8
1354	0.7576	0.1619	0.09421	0.2561	0.7053	0.08935	0.06645	0.1558	0.5726	0.06164	0.03895	0.1006	0.2693	0.01039	0.006358	0.01675	0.2715	0.01556	0.003466	0.01903	0.4621	0.08059	0.0329	0.1135	1.5201	0.832	0.2267	1.0587	7/20/2012	8/17/2012	M	Y	2	WG	2	1017	1015	4.1	7.2	9	12.2	14	14.4	14.6	16	16.7	17.9	17.5	18.5
1362	0.6513	0.1115	0.07084	0.1824	0.5485	0.05281	0.0377	0.09051	0.4755	0.0396	0.0308	0.07041	0.2194	0.005842	0.004712	0.01055	0.2115	0.01006	0.001767	0.01183	0.4345	0.07149	0.01635	0.08784	1.513	0.8042	0.2332	1.0374	7/23/2012	8/20/2012	M	Y	6	GW	2	640	655	4.8	7.2	10.4	14.5	17	16.2	17.5	17.4	17.7	18.2	18	18.3
1368	0.5847	0.08639	0.05275	0.1391	0.5162	0.0443	0.03815	0.08245	0.4992	0.04356	0.02926	0.07282	0.2338	0.007074	0.004239	0.01131	0.2386	0.01199	0.002116	0.01411	0.4931	0.06469	0.02361	0.0883	1.5884	0.7799	0.2426	1.0225	7/23/2012	8/20/2012	F	Y	6	GW	2	640	655	3.8	6.6	9.2	11.6	14.2	14.2	15	13.7	14.2	15.1	15.2	14.9
1376	0.5954	0.09245	0.06288	0.1553	0.5107	0.04435	0.03286	0.07721	0.4687	0.03919	0.02442	0.06361	0.2398	0.007271	0.00446	0.01173	0.2578	0.01522	0.002939	0.01816	0.4535	0.05794	0.02398	0.08193	1.6672	0.8946	0.2725	1.1671	7/26/2012	8/23/2012	F	Y	6	WG	2	737	738	5.2	8	9.6	11.2	12	12.4	13.2	14.1	14.6	16.2	15.3	16.2
1384	0.82	0.1732	0.1304	0.3036	0.6188	0.06086	0.04658	0.1074	0.5944	0.06654	0.04594	0.1125	0.2756	0.01032	0.006388	0.01671	0.2609	0.01272	0.003258	0.01598	0.4935	0.07478	0.02221	0.09699	1.7341	1.0486	0.3	1.3486	7/26/2012	8/17/2012	F	Y	2	GW	2	1084	1081	4.6	8.5	10.2	12	13.2	14.4	15.1	15.5	16.4	17.2	17.3	17.7
1392	0.7348	0.162	0.09305	0.255	0.5274	0.04508	0.03303	0.0781	0.5179	0.05315	0.03647	0.08962	0.2185	0.005927	0.00569	0.01162	0.2447	0.01533	0.002969	0.0183	0.5311	0.08536	0.02251	0.1079	1.5375	0.8923	0.2208	1.1131	7/26/2012	8/23/2012	M	Y	2	WG	2	1014	1013	5.2	9	10.7	14.2	18.1	17.2	18.5	19.8	19.8	20.9	20.2	21.7
1399	0.5781	0.08689	0.05703	0.1439	0.5141	0.03799	0.03211	0.0701	0.472	0.04284	0.02858	0.07142	0.2104	0.005578	0.004543	0.01012	0.2373	0.01188	0.002716	0.0146	0.4551	0.06639	0.01924	0.08563	1.4236	0.6996	0.1993	0.8988	7/27/2012	8/21/2012	F	Y	2	WG	2	1061	1063	5	8.3	11.2	13.2	14.6	15.5	15.6	15	16.7	17	16.1	17.1
1322	0.7795	0.1619	0.09427	0.2562	0.61	0.051	0.04673	0.09773	0.5623	0.05684	0.04243	0.09927	0.2592	0.008324	0.006752	0.01508	0.2636	0.01434	0.003105	0.01745	0.5505	0.08872	0.02693	0.1156	1.6905	0.9857	0.275	1.2606	7/10/2012	8/6/2012	M	Y	2	GW	2	1010	1012	4.3	7.9	10.2	14.3	18.1	18.3	18.4	18.2	19.6	21	20.3	21.5
1330	0.6247	0.09253	0.06214	0.1547	0.5497	0.04375	0.03359	0.07735	0.4987	0.03822	0.0262	0.06441	0.244	0.005402	0.004742	0.01014	0.2678	0.01239	0.002812	0.01521	0.4457	0.06306	0.01875	0.08181	1.7713	0.9751	0.2344	1.2095	7/12/2012	8/9/2012	F	Y	2	GW	2	1011	1012	4.5	8.4	10.8	14.9	18.5	18	18.9	17.2	18.8	19.5	19.1	19.4
1338	0.8675	0.2048	0.0955	0.3003	0.7056	0.0741	0.04754	0.1216	0.5712	0.05736	0.04169	0.09905	0.2417	0.006662	0.005197	0.01186	0.2758	0.02054	0.002416	0.02295	0.5473	0.09051	0.02732	0.1178	1.5219	0.878	0.239	1.1171	7/17/2012	8/14/2012	M	Y	6	WG	2	671	738	4.4		9.2	13.3	18.4	21	23.1	24.2	24.8	25.2	24.9	24.4
1346	0.6482	0.1242	0.07498	0.1992	0.5258	0.05112	0.04104	0.09216	0.498	0.0484	0.03495	0.08335	0.2303	0.007189	0.005642	0.01283	0.2812	0.01785	0.003999	0.02185	0.4741	0.07568	0.01846	0.09414	1.4486	0.831	0.2195	1.0504	7/17/2012	8/7/2012	M	Y	2	WG	2	1018	1015	5.5	9	11.3	13.1	17.2		17.9	19.5	20.3	20.6	21.5	20.5
1355	0.6511	0.1147	0.06911	0.1838	0.5503	0.04243	0.03434	0.07677	0.5395	0.04948	0.04096	0.09044	0.2595	0.007863	0.006974	0.01484	0.2514	0.01094	0.003387	0.01433	0.5101	0.08282	0.02764	0.1105	1.7727	1.0574	0.2792	1.3365	7/20/2012	8/17/2012	F	Y	2	WG	2	1017	1015	4.8	8	10.6	13	14.7	15.1	15.7	17.5	16.4	17.4	17.8	17.4
1363	0.643	0.111	0.07203	0.183	0.569	0.0534	0.04736	0.1008	0.4826	0.04412	0.031	0.07512	0.2733	0.009268	0.006588	0.01586	0.2568	0.0143	0.002858	0.01716	0.4101	0.05919	0.02005	0.07924	1.6369	0.8747	0.2783	1.153	7/23/2012	8/20/2012	F	Y	6	GW	2	640	655	4.9	7.7	11.5	14	16.6	17	17.5	16.3	17.7	18.4	18.3	17.6
1377	0.5884	0.0857	0.05955	0.1452	0.5018	0.0401	0.03228	0.07238					0.2473	0.007183	0.005425	0.01261	0.2528	0.01387	0.002967	0.01684	0.4687	0.06376	0.01982	0.08358	1.5564	0.745	0.2423	0.9873	7/26/2012	8/23/2012	F	Y	6	WG	2	737	738	4.9	7.5	8.7	9.9	11.4	11.9	12.3	12.8	13.3	14.5	13.5	14.8
1385	0.7415	0.1512	0.09117	0.2423	0.5524	0.0464	0.03896	0.08536	0.6395	0.07013	0.05036	0.1205	0.3017	0.01221	0.007804	0.02001	0.2801	0.01628	0.003576	0.01986	0.4903	0.0787	0.02627	0.105	1.7741	1.0112	0.312	1.3232	7/26/2012	8/17/2012	F	Y	2	GW	2	1084	1081	6.2	10.5	12.5	13.3	14.3	16.4	17.2	18	17.9	18	18.8	18.6
1411	0.6567	0.1157	0.07434	0.1901	0.55	0.05975	0.04066	0.1004	0.4914	0.04457	0.0339	0.07847	0.2474	0.007754	0.005986	0.01374	0.2722	0.01601	0.004288	0.02029	0.4854	0.07968	0.02131	0.101	1.5116	0.8177	0.2269	1.0445	7/28/2012	8/16/2012	M	Y	2	WG	2	1016	1013	6.3	10.5	11.5	14.5	19	18.3	19	19.3	19.9	19.3	19.8	19.5
1323	0.6772	0.1184	0.07161	0.19	0.5742	0.04729	0.04124	0.08852	0.5405	0.05105	0.03216	0.08321	0.2582	0.00769	0.006238	0.01393	0.2327	0.009532	0.003003	0.01254	0.54	0.06789	0.02328	0.09117	1.5434	0.8462	0.2462	1.0924	7/10/2012	8/6/2012	F	Y	2	GW	2	1010	1012	4.5	8.1	10.5	12.9	14.1	13.9	15.5	16.6	17.1	18	17.2	17.6
1331	0.7462	0.1332	0.08629	0.2195	0.6352	0.05863	0.04793	0.1066	0.5488	0.0478	0.03403	0.08183	0.2585	0.00741	0.0055	0.01291	0.2627	0.01291	0.003138	0.01605	0.5054	0.06937	0.02586	0.09523	1.5249	0.7915	0.2263	1.0178	7/12/2012	8/9/2012	M	Y	2	GW	2	1011	1012	4.2	7.7	9.3	14.2	17.6	18.7	19	19.3	21.1	22.9	22.7	24.4
1347	0.7063	0.1611	0.09081	0.252	0.5838	0.06018	0.04496	0.1051	0.6087	0.07289	0.04998	0.1229									0.5537	0.09312	0.02986	0.123	1.6742	0.9847	0.2972	1.282	7/18/2012	8/15/2012	M	Y	6	WG	2	669	739	5.8	12.2	13.9	14.6	17.2	18	20	20.6	20.1	21.7	21.1	21.6
1356	0.6324	0.09709	0.06289	0.16	0.51	0.03631	0.03247	0.06878	0.5028	0.03978	0.03014	0.06992	0.2138	0.004651	0.004462	0.009113	0.2525	0.0119	0.003115	0.01501	0.4048	0.05809	0.01647	0.07457	1.426	0.6811	0.2112	0.8923	7/20/2012	8/17/2012	F	Y	2	WG	2	1017	1015	4.3	7.4	9.2	12	13.4	13.7	13.5	14	14	14.9	14.8	14.5
1364	0.7271	0.1335	0.08773	0.2212	0.6926	0.07749	0.06442	0.1419	0.5658	0.05149	0.03697	0.08847	0.2886	0.00881	0.007759	0.01657	0.2886	0.02018	0.002717	0.0229	0.4717	0.08046	0.03089	0.1114	1.6674	0.9328	0.2589	1.1917	7/23/2012	8/20/2012	M	Y	6	GW	2	640	655	5.4	8.4	11.2	15.8	19.7	18.9	20	20.3	21.5	21.7	21.6	21.6
1370	0.6726	0.1275	0.08257	0.2101	0.5689	0.05935	0.03791	0.09726	0.4878	0.04306	0.03105	0.07411	0.2258	0.007362	0.004413	0.01178	0.2599	0.01322	0.003905	0.01712	0.4211	0.06856	0.01977	0.08833					7/23/2012	8/14/2012	M	Y	2	WG	2	1062	1059	4.6	8.5	11.7	14.7	16.2	16	16.6	17.4	17.9	18.3	18.3	18.3
1378	0.7928	0.1816	0.108	0.2895	0.6602	0.0731	0.0551	0.1282	0.5741	0.06148	0.04078	0.1023	0.2557	0.007938	0.007092	0.01503	0.2803	0.0166	0.002763	0.01937	0.5347	0.09458	0.02158	0.1162	1.6442	0.9891	0.2785	1.2676	7/26/2012	8/23/2012	M	Y	6	WG	2	737	738	5.4	8.5	12.4	16.9	21.1	20.4	21.9	23	23.9	25.3	24.3	25.6
1386	0.8704	0.1935	0.1174	0.3109	0.642	0.06888	0.048	0.1169	0.6037	0.06571	0.05044	0.1161	0.3019	0.01159	0.007915	0.0195	0.3257	0.02107	0.004746	0.02581	0.6946	0.1282	0.02769	0.1559	1.7863	1.2276	0.3072	1.5348	7/26/2012	8/17/2012	M	Y	2	GW	2	1084	1081	5.6	10.1	11.7	16.3	18.1	17	18.6	19.1	19.2	20.2	20.1	20.4
1412	0.5979	0.09739	0.058	0.1554	0.4976	0.0394	0.0347	0.0741	0.53	0.0495	0.02505	0.07456	0.2297	0.006447	0.00525	0.0117	0.2322	0.01271	0.002151	0.01486	0.4236	0.0626	0.01837	0.08097	1.7114	0.8537	0.2571	1.1108	7/28/2012	8/16/2012	F	Y	2	WG	2	1016	1013	6.6	10.7	12.3	13.7	14.9	15.1	16	15.7	14.9	16.4	16.6	15.5
1316	0.7028	0.1437	0.09393	0.2376	0.5405	0.05953	0.03386	0.09339	0.5574	0.05957	0.04178	0.1013	0.2446	0.008065	0.00643	0.0145	0.2563	0.01668	0.002939	0.01962	0.4905	0.0855	0.02187	0.1074	1.5872	0.9187	0.2449	1.1636	7/5/2012	7/27/2012	M	Y	2	GW	2	1084	1081	6.5	11.2	13.8	18.5	18.8	18.6	19.2	19.1	19.2	20.2	21	20.6
1324	0.6804	0.1138	0.05809	0.1719	0.5316	0.03495	0.03225	0.0672	0.4961	0.03843	0.02585	0.06428	0.2723	0.007114	0.00613	0.01324	0.2314	0.01202	0.001784	0.0138	0.4555	0.06285	0.01487	0.07772	1.6229	0.8827	0.2491	1.1318	7/12/2012	8/9/2012	F	Y	2	GW	2	1011	1012	5	8.8	10.9	12	13.8	14.6		15.6	18.6	17.4	17.1	18
1332	0.6864	0.1305	0.08313	0.2136	0.5954	0.05646	0.04351	0.09996	0.47	0.04322	0.03201	0.07523	0.2352	0.006225	0.005665	0.01189	0.2675	0.01519	0.002625	0.01782	0.5234	0.0904	0.02802	0.1184	1.5092	0.7228	0.2408	0.9636	7/17/2012	8/14/2012	M	Y	6	WG	2	671	738	4.8		8.4	11.9	16.4	16.8	17.7	18.7	19.7	20.7	20.1	20.6
1349	0.711	0.1591	0.08395	0.243	0.6016	0.06944	0.0479	0.1173	0.5479	0.06066	0.0404	0.1011	0.2626	0.01036	0.008273	0.01863	0.2736	0.01887	0.003365	0.02223	0.5303	0.0837	0.02631	0.11	1.5231	0.7738	0.2617	1.0355	7/18/2012	8/15/2012	M	Y	6	WG	2	669	739	6	12.5	15.3	20	23.3	23.2	23.9	24.1	25.1	25.4	24.7	25.3
1357	0.7103	0.133	0.08932	0.2223	0.6114	0.06178	0.05597	0.1178	0.5926	0.05891	0.04347	0.1024	0.2653	0.008395	0.007051	0.01545	0.2817	0.01715	0.004135	0.02128	0.5648	0.07824	0.02827	0.1065	1.8024	1.11	0.2853	1.3953	7/20/2012	8/17/2012	F	Y	2	WG	2	1017	1015	4.3	7.6	10	13.1	14.6	15	15.9	17.2	16.2	17	17.8	17.6
1365	0.5705	0.09438	0.06335	0.1577	0.5223	0.0446	0.0376	0.08221	0.4668	0.03965	0.02878	0.06843	0.2256	0.006775	0.005277	0.01205	0.2155	0.009475	0.001974	0.01145	0.4089	0.06097	0.01738	0.07835	1.6039	0.8345	0.2495	1.084	7/23/2012	8/20/2012	F	Y	6	GW	2	640	655	4.9	8	10.8	13.1	15.5	15.9	16.2	15.8	16.5	17.1	17.2	16.8
1379	0.6179	0.1077	0.06506	0.1728	0.5099	0.05535	0.0292	0.08456	0.4684	0.04376	0.03168	0.07545	0.2361	0.007163	0.005882	0.01304	0.2662	0.01659	0.003878	0.02046	0.4775	0.08153	0.02169	0.1032	1.6614	0.9349	0.2491	1.184	7/26/2012	8/23/2012	M	Y	6	WG	2	737	738	5.5	8.8	11.4	14.3	17.2	16.4	18	17.5	18.2	18.8	17.9	18
[truncated: 4 more columns]
